# Supplementary material for: Runx1 Loss Minimally Impacts Long-Term Hematopoietic Stem Cells
Source: PLoS One. 2011 Dec 1;6(12):e28430. doi: 10.1371/journal.pone.0028430 (PMC3228772; doi:10.1371/journal.pone.0028430)
Supplement: Table S1 — Gene expression changes in LSK cells. Listed are changes >1.5 fold, with a significance threshold of 0.005. The data correspond to 1026 probesets and 902 unique genes. (XLS) [file pone.0028430.s001.xls]

## Sheet: LSK
Gene symbol	Gene Name	Fold-change	Probe set			Runx1-deficient LSK cells
Xaf1	XIAP associated factor 1	-42.129	1443621_at			Significance threshold was 0.005 Fold change >1.5
Gbp1	guanylate binding protein 1	-33.567	1420549_at
BC023105	cDNA sequence BC023105	-32.9636	1425394_at			1026 Probesets
Ndn	necdin	-19.7334	1455792_x_at			902 unique genes
Neo1	neogenin	-19.5738	1447693_s_at
LOC67527	murine leukemia retrovirus	-16.3963	1431213_a_at
Prkd1	protein kinase D1	-13.4366	1447623_s_at
Ndn	necdin	-12.0707	1435383_x_at
Adi1	acireductone dioxygenase 1	-10.4063	1438758_at
Ndn	necdin	-9.09434	1435382_at
Calml4	calmodulin-like 4	-8.85623	1424713_at
Ndn	necdin	-8.78115	1437853_x_at
Cdgap	Cdc42 GTPase-activating protein	-8.77027	1455164_at
Pclo	piccolo (presynaptic cytomatrix protein)	-7.45871	1419392_at
Nr4a2	nuclear receptor subfamily 4, group A, member 2	-6.36004	1455034_at
Lpin1	lipin 1	-6.18395	1426516_a_at
Rnf128	ring finger protein 128	-6.11971	1418318_at
Cd99l2	Cd99 antigen-like 2	-5.80314	1456746_a_at
Col1a2	collagen, type I, alpha 2	-5.71875	1450857_a_at
Apob	apolipoprotein B	-5.56464	1455593_at
Pfn2	profilin 2	-5.53641	1418209_a_at
Pgr	progesterone receptor	-5.50331	1439527_at
Tmem191c	transmembrane protein 191C	-5.45507	1420191_s_at
Lilrb4	leukocyte immunoglobulin-like receptor, subfamily B, member 4	-5.24215	1420394_s_at
Ncam1	neural cell adhesion molecule 1	-5.21265	1426864_a_at
Tmem191c	transmembrane protein 191C	-5.19858	1420192_at
Klhl4	kelch-like 4 (Drosophila)	-5.16936	1439078_at
Dsg2	desmoglein 2	-5.02067	1449740_s_at
Prdm16	PR domain containing 16	-4.89171	1440870_at
Tfpi	tissue factor pathway inhibitor	-4.77617	1452432_at
Fscn1	fascin homolog 1, actin bundling protein (Strongylocentrotus purpuratus)	-4.73128	1416514_a_at
1700021P22Rik	RIKEN cDNA 1700021P22 gene	-4.71951	1437710_x_at
Wdfy1	WD repeat and FYVE domain containing 1	-4.71627	1437358_at
Lpl	lipoprotein lipase	-4.70908	1415904_at
Ldhb	lactate dehydrogenase B	-4.63099	1434499_a_at
Egr3	early growth response 3	-4.6139	1436329_at
Trpc6	transient receptor potential cation channel, subfamily C, member 6	-4.60396	1449431_at
Dixdc1	DIX domain containing 1	-4.5624	1435207_at
OTTMUSG00000011070	predicted gene, OTTMUSG00000011070	-4.55963	1438237_at
Nrk	Nik related kinase	-4.48032	1450079_at
Spon1	spondin 1, (f-spondin) extracellular matrix protein	-4.4347	1451342_at
Stk17b	serine/threonine kinase 17b (apoptosis-inducing)	-4.42887	1430165_at
Tox	thymocyte selection-associated high mobility group box	-4.40571	1425484_at
Itsn1	intersectin 1 (SH3 domain protein 1A)	-4.40241	1452338_s_at
Fgd5	FYVE, RhoGEF and PH domain containing 5	-4.37201	1460578_at
Gpr64	G protein-coupled receptor 64	-4.36072	1439795_at
Serpinf1	serine (or cysteine) peptidase inhibitor, clade F, member 1	-4.35308	1416168_at
Tmem191c	transmembrane protein 191C	-4.31843	1449770_x_at
Cmpk2	cytidine monophosphate (UMP-CMP) kinase 2, mitochondrial	-4.31427	1450484_a_at
Nov	nephroblastoma overexpressed gene	-4.3059	1426852_x_at
ENSMUSG00000072769	predicted gene, ENSMUSG00000072769	-4.30534	1436265_at
LOC277692	similar to Rps19 protein	-4.30506	1460442_at
Ldhb	lactate dehydrogenase B	-4.30206	1455235_x_at
Nedd4	neural precursor cell expressed, developmentally down-regulated 4	-4.28979	1421955_a_at
Id2	inhibitor of DNA binding 2	-4.28308	1435176_a_at
Mcpt8	mast cell protease 8	-4.25618	1449965_at
Nope	neighbor of Punc E11	-4.23982	1416473_a_at
Bmpr1a	bone morphogenetic protein receptor, type 1A	-4.22207	1425492_at
Ndn	necdin	-4.20886	1415923_at
Fcrla	Fc receptor-like A	-4.19904	1419907_s_at
Cbr3	carbonyl reductase 3	-4.19162	1427912_at
9130008F23Rik	RIKEN cDNA 9130008F23 gene	-4.18425	1430221_at
Tm2d2	TM2 domain containing 2	-4.17497	1456663_x_at
Rsad2	radical S-adenosyl methionine domain containing 2	-4.14794	1436058_at
Aldh1a1	aldehyde dehydrogenase family 1, subfamily A1	-4.13571	1416468_at
Alcam	activated leukocyte cell adhesion molecule	-4.10509	1437466_at
Fhl1	four and a half LIM domains 1	-4.09863	1417872_at
Tox	thymocyte selection-associated high mobility group box	-4.06973	1442039_at
Ctse	cathepsin E	-4.05126	1418989_at
Arhgap5	Rho GTPase activating protein 5	-4.03015	1450897_at
1500009L16Rik	RIKEN cDNA 1500009L16 gene	-4.02937	1452840_at
Lima1	LIM domain and actin binding 1	-4.02888	1450629_at
Clec1a	C-type lectin domain family 1, member a	-3.99635	1460039_at
Irf6	interferon regulatory factor 6	-3.98768	1418301_at
Vwf	Von Willebrand factor homolog	-3.9734	1435386_at
Nbea	neurobeachin	-3.95429	1452251_at
Mum1l1	melanoma associated antigen (mutated) 1-like 1	-3.93763	1455238_at
Ptpn3	protein tyrosine phosphatase, non-receptor type 3	-3.93271	1455450_at
Alcam	activated leukocyte cell adhesion molecule	-3.9271	1426301_at
Spo11	sporulation protein, meiosis-specific, SPO11 homolog (S. cerevisiae)	-3.89938	1417021_a_at
Rbm45	RNA binding motif protein 45	-3.86719	1437904_at
Tmem87a	transmembrane protein 87A	-3.86364	1424454_at
Pls3	plastin 3 (T-isoform)	-3.84393	1423725_at
Rec8	REC8 homolog (yeast)	-3.82793	1419147_at
Cldn5	claudin 5	-3.79539	1417839_at
5830443L24Rik	RIKEN cDNA 5830443L24 gene	-3.78235	1418776_at
Rab37	RAB37, member of RAS oncogene family	-3.741	1433947_at
Jam2	junction adhesion molecule 2	-3.73713	1436568_at
Ywhaz	tyrosine 3-monooxygenase/tryptophan 5-monooxygenase activation protein, zeta polypeptide	-3.73624	1416103_at
Adi1	acireductone dioxygenase 1	-3.72118	1438759_x_at
Rassf10	Ras association (RalGDS/AF-6) domain family (N-terminal) member 10	-3.71739	1457140_s_at
Bex1	brain expressed gene 1	-3.71066	1448595_a_at
Gsta4	glutathione S-transferase, alpha 4	-3.69169	1416368_at
Atp7a	ATPase, Cu++ transporting, alpha polypeptide	-3.69132	1418774_a_at
Il17rb	interleukin 17 receptor B	-3.63516	1420678_a_at
Prkg1	protein kinase, cGMP-dependent, type I	-3.63427	1444232_at
Ldhb	lactate dehydrogenase B	-3.62022	1448237_x_at
Dsg2	desmoglein 2	-3.59845	1439476_at
Sh3bp5	SH3-domain binding protein 5 (BTK-associated)	-3.59011	1421923_at
Mmrn1	multimerin 1	-3.58248	1437260_at
OTTMUSG00000001305	predicted gene, OTTMUSG00000001305	-3.51493	1439055_at
Rpgrip1	retinitis pigmentosa GTPase regulator interacting protein 1	-3.51323	1454231_a_at
Maf	avian musculoaponeurotic fibrosarcoma (v-maf) AS42 oncogene homolog	-3.50378	1447849_s_at
Klf12	Kruppel-like factor 12	-3.49263	1439847_s_at
Nfkbiz	nuclear factor of kappa light polypeptide gene enhancer in B-cells inhibitor, zeta	-3.48529	1417483_at
Mpzl1	myelin protein zero-like 1	-3.47421	1428167_a_at
D330040H18Rik	RIKEN cDNA D330040H18 gene	-3.46817	1444432_at
Pyhin1	pyrin and HIN domain family, member 1	-3.44818	1435330_at
Arrdc4	arrestin domain containing 4	-3.43814	1426818_at
Rbpms2	RNA binding protein with multiple splicing 2	-3.43531	1424008_a_at
Nr4a2	nuclear receptor subfamily 4, group A, member 2	-3.42742	1447863_s_at
9030611O19Rik	RIKEN cDNA 9030611O19 gene	-3.39992	1418879_at
Clec1a	C-type lectin domain family 1, member a	-3.39424	1456318_at
Osmr	oncostatin M receptor	-3.36868	1418674_at
Stk11	serine/threonine kinase 11	-3.3632	1438370_x_at
Nr4a1	nuclear receptor subfamily 4, group A, member 1	-3.35119	1416505_at
Ptgs2	prostaglandin-endoperoxide synthase 2	-3.33823	1417262_at
D10Ertd610e	DNA segment, Chr 10, ERATO Doi 610, expressed	-3.33315	1419978_s_at
Myom1	myomesin 1	-3.32278	1420693_at
4931440B09Rik	RIKEN cDNA 4931440B09 gene	-3.29998	1446287_at
Alcam	activated leukocyte cell adhesion molecule	-3.29962	1437467_at
Zfp612	zinc finger protein 612	-3.29552	1427104_at
Ttc8	tetratricopeptide repeat domain 8	-3.29032	1424410_at
Slc16a12	solute carrier family 16 (monocarboxylic acid transporters), member 12	-3.28358	1434188_at
Maf	avian musculoaponeurotic fibrosarcoma (v-maf) AS42 oncogene homolog	-3.27132	1435828_at
Sla2	Src-like-adaptor 2	-3.27119	1437504_at
Acp1	acid phosphatase 1, soluble	-3.27102	1422716_a_at
Gm1337	gene model 1337, (NCBI)	-3.27087	1443287_at
Klhl13	kelch-like 13 (Drosophila)	-3.25252	1448269_a_at
Pkia	protein kinase inhibitor, alpha	-3.24835	1420859_at
Gdpd3	glycerophosphodiester phosphodiesterase domain containing 3	-3.24714	1449526_a_at
Egr2	early growth response 2	-3.2346	1427683_at
Itsn1	intersectin 1 (SH3 domain protein 1A)	-3.23278	1435885_s_at
C530008M17Rik	RIKEN cDNA C530008M17 gene	-3.23275	1434645_at
Ap1s3	adaptor-related protein complex AP-1, sigma 3	-3.19653	1455735_at
Aph1b	anterior pharynx defective 1b homolog (C. elegans)	-3.19466	1456500_at
Cadm1	cell adhesion molecule 1	-3.19114	1417377_at
Fstl1	follistatin-like 1	-3.16588	1448259_at
Gsn	gelsolin	-3.16271	1437171_x_at
Prkd1	protein kinase D1	-3.16161	1422673_at
Fstl1	follistatin-like 1	-3.14613	1416221_at
Cuedc1	CUE domain containing 1	-3.14095	1451447_at
Atp10d	ATPase, class V, type 10D	-3.14007	1436544_at
Gsn	gelsolin	-3.11322	1436991_x_at
Nap1l3	nucleosome assembly protein 1-like 3	-3.10563	1418500_at
Marcks	myristoylated alanine rich protein kinase C substrate	-3.10407	1456700_x_at
Rab40b	Rab40b, member RAS oncogene family	-3.09687	1436566_at
Ddr1	discoidin domain receptor family, member 1	-3.09526	1456226_x_at
Ppargc1a	peroxisome proliferative activated receptor, gamma, coactivator 1 alpha	-3.08473	1460336_at
Wwtr1	WW domain containing transcription regulator 1	-3.07436	1417818_at
Gulp1	GULP, engulfment adaptor PTB domain containing 1	-3.05173	1434423_at
B430201A12Rik	RIKEN cDNA B430201A12 gene	-3.05111	1455033_at
Sdc2	syndecan 2	-3.04283	1417011_at
Flywch2	FLYWCH family member 2	-3.00616	1438982_s_at
Ccr9	chemokine (C-C motif) receptor 9	-3.00292	1427419_x_at
2600010E01Rik	RIKEN cDNA 2600010E01 gene	-3.00011	1452834_at
Ahr	aryl-hydrocarbon receptor	-2.99955	1422631_at
9230110C19Rik	RIKEN cDNA 9230110C19 gene	-2.99768	1443934_at
Inadl	InaD-like (Drosophila)	-2.98517	1418983_at
Pkp2	plakophilin 2	-2.96583	1449799_s_at
Sfi1	Sfi1 homolog, spindle assembly associated (yeast)	-2.96349	1426787_at
Klf4	Kruppel-like factor 4 (gut)	-2.95069	1417394_at
Letm2	leucine zipper-EF-hand containing transmembrane protein 2	-2.95018	1435499_at
Gnai1	guanine nucleotide binding protein (G protein), alpha inhibiting 1	-2.92468	1454959_s_at
Jag2	jagged 2	-2.92214	1426431_at
Rsad2	radical S-adenosyl methionine domain containing 2	-2.91225	1421009_at
Prnp	prion protein	-2.90696	1448233_at
Lass4	LAG1 homolog, ceramide synthase 4	-2.89809	1417782_at
Abcb1a	ATP-binding cassette, sub-family B (MDR/TAP), member 1A	-2.88622	1419759_at
Sh3yl1	Sh3 domain YSC-like 1	-2.87873	1449579_at
Myd116	myeloid differentiation primary response gene 116	-2.85663	1448325_at
Rps6ka6	ribosomal protein S6 kinase polypeptide 6	-2.85629	1429759_at
Mfhas1	malignant fibrous histiocytoma amplified sequence 1	-2.85542	1429005_at
Icos	inducible T-cell co-stimulator	-2.85048	1436598_at
B3gnt5	UDP-GlcNAc:betaGal beta-1,3-N-acetylglucosaminyltransferase 5	-2.8454	1420994_at
Nisch	nischarin	-2.8431	1433757_a_at
2810021J22Rik	RIKEN cDNA 2810021J22 gene	-2.8336	1453747_at
Trove2	TROVE domain family, member 2	-2.81984	1436533_at
Zfp467	zinc finger protein 467	-2.81873	1441727_s_at
Rps24	ribosomal protein S24	-2.81418	1455195_at
Klf12	Kruppel-like factor 12	-2.81246	1439846_at
Mmp14	matrix metallopeptidase 14 (membrane-inserted)	-2.81118	1448383_at
Irak3	interleukin-1 receptor-associated kinase 3	-2.79833	1435040_at
Maff	v-maf musculoaponeurotic fibrosarcoma oncogene family, protein F (avian)	-2.79805	1418936_at
D1Ertd448e	DNA segment, Chr 1, ERATO Doi 448, expressed	-2.7893	1455723_at
Me1	malic enzyme 1, NADP(+)-dependent, cytosolic	-2.78857	1416632_at
4932415G12Rik	RIKEN cDNA 4932415G12 gene	-2.78592	1428375_at
Wdr40b	WD repeat domain 40B	-2.784	1454869_at
Rnase4	ribonuclease, RNase A family 4	-2.78352	1438936_s_at
Rhbdf1	rhomboid family 1 (Drosophila)	-2.78087	1424138_at
Itsn1	intersectin 1 (SH3 domain protein 1A)	-2.77412	1435884_at
OTTMUSG00000004461	predicted gene, OTTMUSG00000004461	-2.77089	1440215_at
Nisch	nischarin	-2.76569	1433758_at
Pdgfc	platelet-derived growth factor, C polypeptide	-2.7594	1419123_a_at
Mycn	v-myc myelocytomatosis viral related oncogene, neuroblastoma derived (avian)	-2.75659	1417155_at
Anxa4	annexin A4	-2.75465	1424176_a_at
Pcnp	PEST proteolytic signal containing nuclear protein	-2.74894	1452735_at
Arhgef16	Rho guanine nucleotide exchange factor (GEF) 16	-2.73571	1427386_at
Senp7	SUMO1/sentrin specific peptidase 7	-2.72846	1436860_at
Neo1	neogenin	-2.7194	1440789_at
Rab34	RAB34, member of RAS oncogene family	-2.71841	1416590_a_at
Serpinb6a	serine (or cysteine) peptidase inhibitor, clade B, member 6a	-2.71316	1450138_a_at
Ifi44	interferon-induced protein 44	-2.71222	1423555_a_at
Ltb	lymphotoxin B	-2.70866	1419135_at
D630039A03Rik	RIKEN cDNA D630039A03 gene	-2.70836	1437085_at
Cdkn1c	cyclin-dependent kinase inhibitor 1C (P57)	-2.69179	1417649_at
Alox5	arachidonate 5-lipoxygenase	-2.6802	1441962_at
Chic1	cysteine-rich hydrophobic domain 1	-2.67682	1439300_at
Igf2r	insulin-like growth factor 2 receptor	-2.67406	1424112_at
Cldn12	claudin 12	-2.66786	1433781_a_at
9030619P08Rik	RIKEN cDNA 9030619P08 gene	-2.66742	1443889_at
Ttc39b	tetratricopeptide repeat domain 39B	-2.65579	1452008_at
Plcxd2	phosphatidylinositol-specific phospholipase C, X domain containing 2	-2.64219	1435462_at
Vnn1	vanin 1	-2.62407	1447845_s_at
Cc2d2a	coiled-coil and C2 domain containing 2A	-2.62288	1436426_at
Bace1	beta-site APP cleaving enzyme 1	-2.62269	1455826_a_at
OTTMUSG00000010173	predicted gene, OTTMUSG00000010173	-2.62025	1439065_x_at
Ar	androgen receptor	-2.6201	1437064_at
Galc	galactosylceramidase	-2.61295	1452907_at
Cyp7b1	cytochrome P450, family 7, subfamily b, polypeptide 1	-2.60901	1421075_s_at
Clip4	CAP-GLY domain containing linker protein family, member 4	-2.60798	1427278_at
Chrnb1	cholinergic receptor, nicotinic, beta polypeptide 1 (muscle)	-2.60692	1420682_at
Dst	dystonin	-2.60056	1423626_at
Klf6	Kruppel-like factor 6	-2.60017	1418280_at
Mboat2	membrane bound O-acyltransferase domain containing 2	-2.59726	1425029_a_at
Mpdz	multiple PDZ domain protein	-2.59373	1418664_at
Ldhb	lactate dehydrogenase B	-2.58982	1416183_a_at
F730015K02Rik	RIKEN cDNA F730015K02 gene	-2.57856	1446558_at
Epb4.1l4b	erythrocyte protein band 4.1-like 4b	-2.57678	1418294_at
Gnat2	guanine nucleotide binding protein, alpha transducing 2	-2.57567	1422907_at
4930528F23Rik	RIKEN cDNA 4930528F23 gene	-2.57396	1431648_at
Frmd4b	FERM domain containing 4B	-2.56828	1452123_s_at
Homer1	homer homolog 1 (Drosophila)	-2.56741	1437363_at
Hivep3	human immunodeficiency virus type I enhancer binding protein 3	-2.56668	1458802_at
Prkch	protein kinase C, eta	-2.5666	1434248_at
Prkg1	protein kinase, cGMP-dependent, type I	-2.56613	1449876_at
Upp1	uridine phosphorylase 1	-2.5648	1448562_at
Gucy1a3	guanylate cyclase 1, soluble, alpha 3	-2.56244	1434141_at
Adam11	a disintegrin and metallopeptidase domain 11	-2.56019	1455270_at
Sgk1	serum/glucocorticoid regulated kinase 1	-2.55061	1416041_at
Nrip1	nuclear receptor interacting protein 1	-2.54296	1454295_at
Aldoc	aldolase C, fructose-bisphosphate	-2.54249	1451461_a_at
Asb13	ankyrin repeat and SOCS box-containing 13	-2.54118	1449459_s_at
Abca5	ATP-binding cassette, sub-family A (ABC1), member 5	-2.53981	1434474_at
Nxnl2	nucleoredoxin-like 2	-2.53766	1429133_at
Gda	guanine deaminase	-2.52851	1435748_at
Trib3	tribbles homolog 3 (Drosophila)	-2.5237	1456225_x_at
Gpr183	G protein-coupled receptor 183	-2.52285	1437356_at
1300003B13Rik	RIKEN cDNA 1300003B13 gene	-2.52283	1429690_at
Sulf2	sulfatase 2	-2.52253	1447602_x_at
Ehd3	EH-domain containing 3	-2.52238	1417235_at
Iigp1	interferon inducible GTPase 1	-2.52101	1419043_a_at
Bmpr1a	bone morphogenetic protein receptor, type 1A	-2.51861	1425494_s_at
Ghr	growth hormone receptor	-2.51754	1417962_s_at
B430201A12Rik	RIKEN cDNA B430201A12 gene	-2.51571	1434828_at
Egr1	early growth response 1	-2.50888	1417065_at
Il2ra	interleukin 2 receptor, alpha chain	-2.5082	1420692_at
Ror2	receptor tyrosine kinase-like orphan receptor 2	-2.50713	1423428_at
Sorbs1	sorbin and SH3 domain containing 1	-2.50531	1428471_at
Sult1a1	sulfotransferase family 1A, phenol-preferring, member 1	-2.49649	1427345_a_at
Hdac9	histone deacetylase 9	-2.49385	1434572_at
Ctsw	cathepsin W	-2.49258	1422632_at
Jmjd3	jumonji domain containing 3	-2.48935	1456610_at
Nr3c2	nuclear receptor subfamily 3, group C, member 2	-2.48861	1435991_at
Nipa1	non imprinted in Prader-Willi/Angelman syndrome 1 homolog (human)	-2.48648	1434864_at
Iigp2	interferon inducible GTPase 2	-2.48598	1417793_at
5730469M10Rik	RIKEN cDNA 5730469M10 gene	-2.48215	1452716_at
Dennd2a	DENN/MADD domain containing 2A	-2.48051	1433500_at
Myh10	myosin, heavy polypeptide 10, non-muscle	-2.48016	1452740_at
Scrn1	secernin 1	-2.47704	1439500_at
Npdc1	neural proliferation, differentiation and control gene 1	-2.46867	1415919_at
Arhgap29	Rho GTPase activating protein 29	-2.46518	1454745_at
Evc2	Ellis van Creveld syndrome 2 homolog (human)	-2.46508	1429447_at
Cd99l2	Cd99 antigen-like 2	-2.46109	1456747_x_at
Csad	cysteine sulfinic acid decarboxylase	-2.4482	1427981_a_at
Acp1	acid phosphatase 1, soluble	-2.44375	1422717_at
Inadl	InaD-like (Drosophila)	-2.443	1418984_at
Klf6	Kruppel-like factor 6	-2.43957	1433508_at
Ikzf4	IKAROS family zinc finger 4	-2.43859	1438274_at
Nr4a2	nuclear receptor subfamily 4, group A, member 2	-2.432	1450750_a_at
Phactr1	phosphatase and actin regulator 1	-2.43038	1456606_a_at
Ahnak	AHNAK nucleoprotein (desmoyokin)	-2.42216	1452217_at
3110050N22Rik	RIKEN cDNA 3110050N22 gene	-2.4205	1428418_s_at
Cdc14b	CDC14 cell division cycle 14 homolog B (S. cerevisiae)	-2.42029	1429418_at
Clip3	CAP-GLY domain containing linker protein 3	-2.41605	1435256_at
Abhd5	abhydrolase domain containing 5	-2.40807	1417565_at
Fn3k	fructosamine 3 kinase	-2.40746	1418311_at
EG633640	predicted gene, EG633640	-2.40612	1426607_at
Dusp5	dual specificity phosphatase 5	-2.38699	1437199_at
Dmxl2	Dmx-like 2	-2.38493	1428749_at
Fgfbp3	fibroblast growth factor binding protein 3	-2.38284	1453006_at
Gda	guanine deaminase	-2.3823	1435749_at
4930506M07Rik	RIKEN cDNA 4930506M07 gene	-2.37911	1429055_at
Atp8a1	ATPase, aminophospholipid transporter (APLT), class I, type 8A, member 1	-2.37748	1454728_s_at
Scpep1	serine carboxypeptidase 1	-2.37748	1455908_a_at
Marveld2	MARVEL (membrane-associating) domain containing 2	-2.37643	1426914_at
Sbsn	suprabasin	-2.37191	1439630_x_at
Flywch2	FLYWCH family member 2	-2.36662	1424494_s_at
Ehd3	EH-domain containing 3	-2.36632	1417236_at
1500011B03Rik	RIKEN cDNA 1500011B03 gene	-2.36405	1456857_at
Sash1	SAM and SH3 domain containing 1	-2.36288	1448005_at
5730469M10Rik	RIKEN cDNA 5730469M10 gene	-2.36222	1447774_x_at
Prdx6	peroxiredoxin 6	-2.35938	1442878_at
Aspa	aspartoacylase	-2.35832	1418472_at
Myo1d	myosin ID	-2.35703	1458550_at
Grasp	GRP1 (general receptor for phosphoinositides 1)-associated scaffold protein	-2.3537	1441894_s_at
Cbr1	carbonyl reductase 1	-2.35311	1460196_at
Trmt1	TRM1 tRNA methyltransferase 1 homolog (S. cerevisiae)	-2.34997	1436494_x_at
Gstm5	glutathione S-transferase, mu 5	-2.34993	1416842_at
Nrg4	neuregulin 4	-2.34937	1457123_at
Tsc22d1	TSC22 domain family, member 1	-2.34847	1454758_a_at
Fkbp9	FK506 binding protein 9	-2.3449	1437687_x_at
Dyrk3	dual-specificity tyrosine-(Y)-phosphorylation regulated kinase 3	-2.33882	1424229_at
Kazald1	Kazal-type serine peptidase inhibitor domain 1	-2.33747	1436528_at
Ppox	protoporphyrinogen oxidase	-2.3338	1416618_at
Cxcr4	chemokine (C-X-C motif) receptor 4	-2.32546	1448710_at
Zfp93	zinc finger protein 93	-2.32508	1418955_at
Gstt1	glutathione S-transferase, theta 1	-2.32418	1418186_at
Pld3	phospholipase D family, member 3	-2.32333	1416013_at
Tfdp2	transcription factor Dp 2	-2.31985	1443962_at
5930427L02Rik	RIKEN cDNA 5930427L02 gene	-2.31901	1445938_at
1700019E19Rik	RIKEN cDNA 1700019E19 gene	-2.31736	1432494_a_at
BC068157	cDNA sequence BC068157	-2.31726	1429269_at
Cyp2j9	cytochrome P450, family 2, subfamily j, polypeptide 9	-2.31248	1424677_at
Fer1l3	fer-1-like 3, myoferlin (C. elegans)	-2.31215	1427318_s_at
Ar	androgen receptor	-2.31063	1455647_at
ENSMUSG00000068790	predicted gene, ENSMUSG00000068790	-2.309	1452731_x_at
Clasp2	CLIP associating protein 2	-2.30834	1424836_a_at
Mapk12	mitogen-activated protein kinase 12	-2.30826	1449283_a_at
Tspyl4	TSPY-like 4	-2.30608	1424029_at
3222402P14Rik	RIKEN cDNA 3222402P14 gene	-2.30549	1437869_at
Arhgap5	Rho GTPase activating protein 5	-2.29945	1450896_at
Megf9	multiple EGF-like-domains 9	-2.29909	1433968_a_at
Cryz	crystallin, zeta	-2.29863	1438610_a_at
Mettl6	methyltransferase like 6	-2.29686	1432384_a_at
Vdr	vitamin D receptor	-2.29424	1418176_at
Abcg3	ATP-binding cassette, sub-family G (WHITE), member 3	-2.29159	1421168_at
Cd72	CD72 antigen	-2.28818	1426112_a_at
Syne1	synaptic nuclear envelope 1	-2.28333	1455493_at
Stk24	serine/threonine kinase 24 (STE20 homolog, yeast)	-2.27941	1426248_at
Zfp277	zinc finger protein 277	-2.27313	1443362_at
Zfp354c	zinc finger protein 354C	-2.26406	1439044_at
Pdgfc	platelet-derived growth factor, C polypeptide	-2.26145	1449351_s_at
Col4a1	collagen, type IV, alpha 1	-2.25057	1452035_at
Psmf1	proteasome (prosome, macropain) inhibitor subunit 1	-2.25054	1424370_s_at
Fbxo30	F-box protein 30	-2.24418	1453137_at
Vdr	vitamin D receptor	-2.24151	1418175_at
Pld2	phospholipase D2	-2.24117	1457252_x_at
Msi2	Musashi homolog 2 (Drosophila)	-2.23214	1443008_at
Frmd4b	FERM domain containing 4B	-2.2218	1438169_a_at
Agpat9	1-acylglycerol-3-phosphate O-acyltransferase 9	-2.2201	1454799_at
St6galnac5	ST6 (alpha-N-acetyl-neuraminyl-2,3-beta-galactosyl-1,3)-N-acetylgalactosaminide alpha-2,6-sialyltransferase 5	-2.21937	1419420_at
Evi5	ecotropic viral integration site 5	-2.21737	1417512_at
Dip2c	DIP2 disco-interacting protein 2 homolog C (Drosophila)	-2.20893	1429064_at
Klc4	kinesin light chain 4	-2.20856	1417108_at
Plscr4	phospholipid scramblase 4	-2.20713	1433626_at
Dhrs3	dehydrogenase/reductase (SDR family) member 3	-2.20529	1448390_a_at
Gprc5b	G protein-coupled receptor, family C, group 5, member B	-2.20452	1451411_at
Zfp286	zinc finger protein 286	-2.20356	1425080_at
2310010M24Rik	RIKEN cDNA 2310010M24 gene	-2.20228	1429274_at
Bdh2	3-hydroxybutyrate dehydrogenase, type 2	-2.20227	1453011_at
Dkkl1	dickkopf-like 1	-2.19918	1417787_at
Zfp87	zinc finger protein 87	-2.19787	1456827_at
Zfp532	zinc finger protein 532	-2.19372	1435669_at
Tm4sf1	transmembrane 4 superfamily member 1	-2.19352	1450958_at
Dgkg	diacylglycerol kinase, gamma	-2.19155	1431167_at
Gcnt1	glucosaminyl (N-acetyl) transferase 1, core 2	-2.19051	1460431_at
Smo	smoothened homolog (Drosophila)	-2.19003	1427049_s_at
Sfrp1	secreted frizzled-related protein 1	-2.18713	1428136_at
Ccnd2	cyclin D2	-2.18461	1430127_a_at
Zfp551	zinc fingr protein 551	-2.18391	1437705_at
Fbp1	fructose bisphosphatase 1	-2.18183	1448470_at
Obsl1	obscurin-like 1	-2.17905	1427535_s_at
Igf1r	insulin-like growth factor I receptor	-2.17688	1428967_at
Snf1lk	SNF1-like kinase	-2.17396	1459601_at
Vegfc	vascular endothelial growth factor C	-2.1677	1439766_x_at
Extl2	exostoses (multiple)-like 2	-2.16702	1422539_at
Prmt2	protein arginine N-methyltransferase 2	-2.16658	1437234_x_at
Gtpbp2	GTP binding protein 2	-2.16552	1442305_at
Rnf170	ring finger protein 170	-2.16537	1431195_at
Grb10	growth factor receptor bound protein 10	-2.16227	1425458_a_at
Acss2	acyl-CoA synthetase short-chain family member 2	-2.15752	1422478_a_at
Gpr183	G protein-coupled receptor 183	-2.15632	1457691_at
Sorl1	sortilin-related receptor, LDLR class A repeats-containing	-2.15286	1426258_at
Gja1	gap junction protein, alpha 1	-2.1498	1437992_x_at
Casc4	cancer susceptibility candidate 4	-2.14903	1433779_at
Tmem136	transmembrane protein 136	-2.14584	1457701_at
Pcmtd2	protein-L-isoaspartate (D-aspartate) O-methyltransferase domain containing 2	-2.14191	1427074_at
Ctf1	cardiotrophin 1	-2.13877	1449093_at
Med12l	mediator of RNA polymerase II transcription, subunit 12 homolog (yeast)-like	-2.13852	1452864_at
Cdkn1a	cyclin-dependent kinase inhibitor 1A (P21)	-2.13817	1424638_at
D18Ertd232e	DNA segment, Chr 18, ERATO Doi 232, expressed	-2.13657	1441115_at
Rplp1	ribosomal protein, large, P1	-2.13602	1416277_a_at
Evi1	ecotropic viral integration site 1	-2.13412	1438325_at
Krt18	keratin 18	-2.13358	1448169_at
AI835735	expressed sequence AI835735	-2.12535	1459716_at
Ccnd2	cyclin D2	-2.12533	1416123_at
ENSMUSG00000068790	predicted gene, ENSMUSG00000068790	-2.12511	1428301_at
Rrad	Ras-related associated with diabetes	-2.12214	1422562_at
Ptpn21	protein tyrosine phosphatase, non-receptor type 21	-2.11937	1419055_a_at
Sf1	splicing factor 1	-2.11759	1423751_at
Sla2	Src-like-adaptor 2	-2.1174	1451492_at
Zbtb20	zinc finger and BTB domain containing 20	-2.11628	1437598_at
Tmem41b	transmembrane protein 41B	-2.11164	1428586_at
Tcf7l2	transcription factor 7-like 2, T-cell specific, HMG-box	-2.11023	1426639_a_at
Phactr1	phosphatase and actin regulator 1	-2.10723	1439022_at
Tsr2	TSR2, 20S rRNA accumulation, homolog (S. cerevisiae)	-2.10694	1435170_at
Angpt1	angiopoietin 1	-2.10662	1439066_at
Pnpla8	patatin-like phospholipase domain containing 8	-2.10598	1417768_at
Nfkbiz	nuclear factor of kappa light polypeptide gene enhancer in B-cells inhibitor, zeta	-2.10582	1448728_a_at
Id3	inhibitor of DNA binding 3	-2.10346	1416630_at
Mpp7	membrane protein, palmitoylated 7 (MAGUK p55 subfamily member 7)	-2.09958	1455179_at
Pfkp	phosphofructokinase, platelet	-2.09899	1416069_at
Cabc1	chaperone, ABC1 activity of bc1 complex like (S. pombe)	-2.09591	1417066_at
D330050I23Rik	RIKEN cDNA D330050I23 gene	-2.09391	1434301_at
Anxa4	annexin A4	-2.09135	1457658_x_at
Eid2	EP300 interacting inhibitor of differentiation 2	-2.08539	1454931_at
Scfd1	Sec1 family domain containing 1	-2.08482	1444845_at
Glo1	glyoxalase 1	-2.08401	1424108_at
Serpinb8	serine (or cysteine) peptdiase inhibitor, clade B, member 8	-2.0829	1422776_at
Asah3l	N-acylsphingosine amidohydrolase 3-like	-2.08186	1451355_at
Cdgap	Cdc42 GTPase-activating protein	-2.08013	1432022_at
Mpl	myeloproliferative leukemia virus oncogene	-2.07558	1421461_at
Gsn	gelsolin	-2.07436	1456312_x_at
2810410P21Rik	RIKEN cDNA 2810410P21 gene	-2.06956	1454412_at
Insr	insulin receptor	-2.06944	1434446_at
Gulp1	GULP, engulfment adaptor PTB domain containing 1	-2.06922	1453771_at
Glo1	glyoxalase 1	-2.06391	1451240_a_at
Ube2v2	ubiquitin-conjugating enzyme E2 variant 2	-2.06356	1417984_at
Ypel2	yippee-like 2 (Drosophila)	-2.0612	1434277_a_at
Fgd2	FYVE, RhoGEF and PH domain containing 2	-2.0557	1419515_at
4931440B09Rik	RIKEN cDNA 4931440B09 gene	-2.05497	1432312_a_at
ENSMUSG00000069163	predicted gene, ENSMUSG00000069163	-2.05372	1458551_at
Sbf2	SET binding factor 2	-2.05227	1443762_s_at
Megf8	multiple EGF-like-domains 8	-2.04912	1460586_at
Nfkbid	nuclear factor of kappa light polypeptide gene enhancer in B-cells inhibitor, delta	-2.04807	1436074_at
Slc7a7	solute carrier family 7 (cationic amino acid transporter, y+ system), member 7	-2.04659	1417392_a_at
Ssr1	signal sequence receptor, alpha	-2.04306	1441327_a_at
Nicn1	nicolin 1	-2.04075	1449377_at
Abhd10	abhydrolase domain containing 10	-2.04074	1427958_at
Wdfy1	WD repeat and FYVE domain containing 1	-2.03618	1424749_at
Fads3	fatty acid desaturase 3	-2.0355	1435910_at
A630033E08Rik	RIKEN cDNA A630033E08 gene	-2.03386	1437127_at
Sorl1	sortilin-related receptor, LDLR class A repeats-containing	-2.03326	1453003_at
Tfpi	tissue factor pathway inhibitor	-2.03287	1451791_at
Cadm1	cell adhesion molecule 1	-2.03252	1417378_at
Wdr40b	WD repeat domain 40B	-2.03114	1434170_at
Krba1	KRAB-A domain containing 1	-2.03014	1449150_at
Cadps2	Ca2+-dependent activator protein for secretion 2	-2.02881	1451499_at
Map3k8	mitogen-activated protein kinase kinase kinase 8	-2.02688	1419208_at
Tsc22d1	TSC22 domain family, member 1	-2.02455	1425742_a_at
Myadm	myeloid-associated differentiation marker	-2.0225	1439389_s_at
6330439K17Rik	RIKEN cDNA 6330439K17 gene	-2.02231	1439971_at
Pam	peptidylglycine alpha-amidating monooxygenase	-2.02003	1418908_at
Gja1	gap junction protein, alpha 1	-2.01696	1438945_x_at
Rora	RAR-related orphan receptor alpha	-2.01444	1436325_at
Trim47	tripartite motif-containing 47	-2.01378	1426784_at
Tceal3	transcription elongation factor A (SII)-like 3	-2.00902	1450961_a_at
Tmem140	transmembrane protein 140	-2.00682	1424354_at
Bmp1	bone morphogenetic protein 1	-2.00633	1426238_at
Traf3ip3	TRAF3 interacting protein 3	-2.00549	1434573_at
Copa	coatomer protein complex subunit alpha	-2.00511	1437274_at
Inha	inhibin alpha	-2.00286	1422728_at
Epm2aip1	EPM2A (laforin) interacting protein 1	-1.99782	1454835_at
App	amyloid beta (A4) precursor protein	-1.99754	1420621_a_at
C77673	expressed sequence C77673	-1.99743	1444677_at
Ercc5	excision repair cross-complementing rodent repair deficiency, complementation group 5	-1.99633	1450935_at
Tmem18	transmembrane protein 18	-1.99477	1454836_at
Vamp4	vesicle-associated membrane protein 4	-1.99391	1434796_at
Arl6	ADP-ribosylation factor-like 6	-1.99343	1417331_a_at
Gstm1	glutathione S-transferase, mu 1	-1.98979	1416416_x_at
Sos1	Son of sevenless homolog 1 (Drosophila)	-1.98978	1421884_at
Pik3cg	phosphoinositide-3-kinase, catalytic, gamma polypeptide	-1.98903	1422708_at
Cttnbp2nl	CTTNBP2 N-terminal like	-1.98654	1435542_s_at
Dennd2d	DENN/MADD domain containing 2D	-1.98649	1438712_at
Nckap1	NCK-associated protein 1	-1.98599	1452196_a_at
Zfp239	zinc finger protein 239	-1.9859	1416586_at
Mak10	MAK10 homolog, amino-acid N-acetyltransferase subunit, (S. cerevisiae)	-1.9858	1433570_s_at
Prkag2	protein kinase, AMP-activated, gamma 2 non-catalytic subunit	-1.98579	1451140_s_at
Dusp4	dual specificity phosphatase 4	-1.9847	1428834_at
Procr	protein C receptor, endothelial	-1.98445	1420664_s_at
Cldnd1	claudin domain containing 1	-1.98297	1431293_a_at
2010107G23Rik	RIKEN cDNA 2010107G23 gene	-1.98078	1424072_at
Usp54	ubiquitin specific peptidase 54	-1.97974	1428731_at
Anxa5	annexin A5	-1.97703	1425567_a_at
Fosl1	fos-like antigen 1	-1.97583	1417487_at
Dfna5h	deafness, autosomal dominant 5 homolog (human)	-1.97581	1439263_at
Socs5	suppressor of cytokine signaling 5	-1.97484	1423349_at
Fmo5	flavin containing monooxygenase 5	-1.97326	1440899_at
Bex4	brain expressed gene 4	-1.97206	1428209_at
Gpt2	glutamic pyruvate transaminase (alanine aminotransferase) 2	-1.97185	1438385_s_at
Rgnef	Rho-guanine nucleotide exchange factor	-1.96931	1419457_at
Reck	reversion-inducing-cysteine-rich protein with kazal motifs	-1.96913	1450784_at
Tslp	thymic stromal lymphopoietin	-1.96867	1450004_at
D14Ertd436e	DNA segment, Chr 14, ERATO Doi 436, expressed	-1.96846	1426780_at
9330159M07Rik	RIKEN cDNA 9330159M07 gene	-1.96788	1441092_at
Arrdc3	arrestin domain containing 3	-1.96697	1459253_at
Otub2	OTU domain, ubiquitin aldehyde binding 2	-1.96592	1417575_at
Rcan2	regulator of calcineurin 2	-1.9659	1421425_a_at
C330002I19Rik	RIKEN cDNA C330002I19 gene	-1.96566	1455762_at
4933406E20Rik	RIKEN cDNA 4933406E20 gene	-1.96458	1459807_x_at
Cntn1	contactin 1	-1.96222	1449563_at
Slc12a5	solute carrier family 12, member 5	-1.96115	1451674_at
Snx13	sorting nexin 13	-1.96019	1454938_at
Slc40a1	solute carrier family 40 (iron-regulated transporter), member 1	-1.95758	1417061_at
Zfp672	zinc finger protein 672	-1.95702	1424261_at
Dennd1c	DENN/MADD domain containing 1C	-1.95669	1437121_at
Sgpp1	sphingosine-1-phosphate phosphatase 1	-1.95643	1420821_at
2210010N04Rik	RIKEN cDNA 2210010N04 gene	-1.95401	1423989_at
Acp2	acid phosphatase 2, lysosomal	-1.95397	1424654_at
A730056I06Rik	RIKEN cDNA A730056I06 gene	-1.95034	1439894_at
Fkbp9	FK506 binding protein 9	-1.95019	1423677_at
Tmem154	transmembrane protein 154	-1.94976	1437245_at
Tardbp	TAR DNA binding protein	-1.94218	1428467_at
Hoxa2	homeo box A2	-1.94205	1419602_at
Cd24a	CD24a antigen	-1.93959	1437502_x_at
Cdcp1	CUB domain containing protein 1	-1.93887	1427095_at
Ccdc112	coiled-coil domain containing 112	-1.93877	1429167_at
Rnase4	ribonuclease, RNase A family 4	-1.93816	1438937_x_at
Dcun1d3	DCN1, defective in cullin neddylation 1, domain containing 3 (S. cerevisiae)	-1.93762	1437763_at
Hbegf	heparin-binding EGF-like growth factor	-1.93357	1418350_at
Cyr61	cysteine rich protein 61	-1.93258	1442340_x_at
Psip1	PC4 and SFRS1 interacting protein 1	-1.93146	1442148_at
AK129341	cDNA sequence AK129341	-1.92799	1445173_at
Dsel	dermatan sulfate epimerase-like	-1.92721	1438407_at
Zfp69	zinc finger protein 69	-1.92298	1458274_at
Tnfaip2	tumor necrosis factor, alpha-induced protein 2	-1.92214	1438855_x_at
Bhlhb2	basic helix-loop-helix domain containing, class B2	-1.91976	1418025_at
1190002H23Rik	RIKEN cDNA 1190002H23 gene	-1.9191	1438511_a_at
Spata13	spermatogenesis associated 13	-1.91809	1454656_at
Kbtbd11	kelch repeat and BTB (POZ) domain containing 11	-1.91578	1435465_at
St3gal6	ST3 beta-galactoside alpha-2,3-sialyltransferase 6	-1.91578	1449078_at
Gmfb	glia maturation factor, beta	-1.91528	1417069_a_at
Casp12	caspase 12	-1.91362	1449297_at
Laptm4b	lysosomal-associated protein transmembrane 4B	-1.91334	1436915_x_at
Cabc1	chaperone, ABC1 activity of bc1 complex like (S. pombe)	-1.91143	1417067_s_at
Trappc5	trafficking protein particle complex 5	-1.90777	1448999_at
B3galtl	beta 1,3-galactosyltransferase-like	-1.90721	1457043_at
Nkx2-3	NK2 transcription factor related, locus 3 (Drosophila)	-1.90657	1425827_at
Ptpn21	protein tyrosine phosphatase, non-receptor type 21	-1.90355	1419054_a_at
Pnpla7	patatin-like phospholipase domain containing 7	-1.90189	1451361_a_at
Epha4	Eph receptor A4	-1.9003	1439757_s_at
Cobll1	Cobl-like 1	-1.89809	1454795_at
Itih5	inter-alpha (globulin) inhibitor H5	-1.8961	1429159_at
Atp8a1	ATPase, aminophospholipid transporter (APLT), class I, type 8A, member 1	-1.89603	1433827_at
9630058J23Rik	RIKEN cDNA 9630058J23 gene	-1.88933	1436795_at
Sec14l2	SEC14-like 2 (S. cerevisiae)	-1.88761	1424530_at
Acbd4	acyl-Coenzyme A binding domain containing 4	-1.88721	1449626_s_at
Metrnl	meteorin, glial cell differentiation regulator-like	-1.88639	1424356_a_at
Rps6ka6	ribosomal protein S6 kinase polypeptide 6	-1.88514	1429760_at
Rapgef4	Rap guanine nucleotide exchange factor (GEF) 4	-1.88256	1425518_at
LOC14210	hypothetical LOC14210	-1.8817	1421534_at
Nol3	nucleolar protein 3 (apoptosis repressor with CARD domain)	-1.88088	1451503_at
Hoxc6	homeo box C6	-1.87924	1427454_at
Lancl3	LanC lantibiotic synthetase component C-like 3 (bacterial)	-1.87762	1437268_at
Lincr	lung-inducible neuralized-related C3HC4 RING domain protein	-1.87755	1444003_at
Ccr9	chemokine (C-C motif) receptor 9	-1.8756	1421920_a_at
Cfc1	cripto, FRL-1, cryptic family 1	-1.87495	1421524_at
Fzd8	frizzled homolog 8 (Drosophila)	-1.86941	1423348_at
Osbpl3	oxysterol binding protein-like 3	-1.86837	1428484_at
Klf6	Kruppel-like factor 6	-1.86834	1447448_s_at
4921533L14Rik	RIKEN cDNA 4921533L14 gene	-1.86667	1453122_at
4933440N22Rik	RIKEN cDNA 4933440N22 gene	-1.86647	1453789_at
Zfp30	zinc finger protein 30	-1.86607	1449813_at
Ets1	E26 avian leukemia oncogene 1, 5@#$%& domain	-1.86101	1426725_s_at
6720475J19Rik	RIKEN cDNA 6720475J19 gene	-1.86001	1423071_x_at
1500031L02Rik	RIKEN cDNA 1500031L02 gene	-1.85877	1417840_at
St6galnac2	ST6 (alpha-N-acetyl-neuraminyl-2,3-beta-galactosyl-1,3)-N-acetylgalactosaminide alpha-2,6-sialyltransferase 2	-1.85593	1417616_at
Armc9	armadillo repeat containing 9	-1.85449	1442165_at
Wbscr27	Williams Beuren syndrome chromosome region 27 (human)	-1.85446	1418359_at
Fmnl2	formin-like 2	-1.85424	1428579_at
Ptger4	prostaglandin E receptor 4 (subtype EP4)	-1.85281	1424208_at
Alcam	activated leukocyte cell adhesion molecule	-1.85256	1426300_at
Rab11fip5	RAB11 family interacting protein 5 (class I)	-1.85192	1434314_s_at
4930414L22Rik	RIKEN cDNA 4930414L22 gene	-1.85074	1439541_at
Neo1	neogenin	-1.84981	1444295_at
Deaf1	deformed epidermal autoregulatory factor 1 (Drosophila)	-1.84878	1448446_at
Mga	MAX gene associated	-1.84821	1434746_at
Spry1	sprouty homolog 1 (Drosophila)	-1.84796	1415874_at
2010109K09Rik	RIKEN cDNA 2010109K09 gene	-1.84715	1442945_at
Nit1	nitrilase 1	-1.84626	1417469_at
Fars2	phenylalanine-tRNA synthetase 2 (mitochondrial)	-1.846	1439406_x_at
Chmp1b	chromatin modifying protein 1B	-1.84538	1418817_at
Mtx3	metaxin 3	-1.84303	1434807_s_at
Gas2l1	growth arrest-specific 2 like 1	-1.84187	1434928_at
Ccdc62	coiled-coil domain containing 62	-1.84098	1458644_at
Amz2	archaelysin family metallopeptidase 2	-1.84054	1417241_at
Gabarapl1	gamma-aminobutyric acid (GABA(A)) receptor-associated protein-like 1	-1.8394	1416419_s_at
Smo	smoothened homolog (Drosophila)	-1.83871	1427048_at
Hemk1	HemK methyltransferase family member 1	-1.83767	1430287_s_at
Map3k12	mitogen-activated protein kinase kinase kinase 12	-1.83761	1417115_at
Boc	biregional cell adhesion molecule-related/down-regulated by oncogenes (Cdon) binding protein	-1.8375	1426869_at
2810432L12Rik	RIKEN cDNA 2810432L12 gene	-1.83582	1423679_at
Zfp618	zinc fingerprotein 618	-1.83579	1436190_at
Pqlc1	PQ loop repeat containing 1	-1.83415	1430125_s_at
Dnajb1	DnaJ (Hsp40) homolog, subfamily B, member 1	-1.83272	1416756_at
Luzp1	leucine zipper protein 1	-1.83131	1448352_at
LOC100043081	hypothetical protein LOC100043081	-1.83075	1441006_at
Ttc19	tetratricopeptide repeat domain 19	-1.83035	1430043_at
Samd9l	sterile alpha motif domain containing 9-like	-1.82893	1436172_at
Strn3	striatin, calmodulin binding protein 3	-1.82873	1423535_at
Tmem66	transmembrane protein 66	-1.8263	1424039_at
Tfdp2	transcription factor Dp 2	-1.82591	1435344_at
Adam9	a disintegrin and metallopeptidase domain 9 (meltrin gamma)	-1.82544	1416094_at
Bach2	BTB and CNC homology 2	-1.82113	1436515_at
Rcor3	REST corepressor 3	-1.81714	1428343_at
Eng	endoglin	-1.81638	1432176_a_at
Serpinb9	serine (or cysteine) peptidase inhibitor, clade B, member 9	-1.81569	1422601_at
Pnrc1	proline-rich nuclear receptor coactivator 1	-1.8149	1433668_at
Rilpl1	Rab interacting lysosomal protein-like 1	-1.81419	1450449_a_at
Fah	fumarylacetoacetate hydrolase	-1.80912	1417220_at
Lmbr1	limb region 1	-1.8085	1426272_at
Tlcd2	TLC domain containing 2	-1.80767	1432282_a_at
Arhgef4	Rho guanine nucleotide exchange factor (GEF) 4	-1.80727	1435033_at
Pfn2	profilin 2	-1.80724	1436993_x_at
Prkcb	protein kinase C, beta	-1.80697	1460419_a_at
Nfatc2	nuclear factor of activated T-cells, cytoplasmic, calcineurin-dependent 2	-1.80554	1439205_at
A930038C07Rik	RIKEN cDNA A930038C07 gene	-1.80538	1460465_at
Ythdc1	YTH domain containing 1	-1.80371	1426827_at
Gabarapl1	gamma-aminobutyric acid (GABA(A)) receptor-associated protein-like 1	-1.80055	1416418_at
Casz1	castor homolog 1, zinc finger (Drosophila)	-1.79979	1459054_at
Zbtb10	zinc finger and BTB domain containing 10	-1.79797	1436067_at
Ulk1	Unc-51 like kinase 1 (C. elegans)	-1.7948	1448370_at
Mtap9	microtubule-associated protein 9	-1.79398	1441961_at
Neo1	neogenin	-1.79296	1423513_at
Hdac11	histone deacetylase 11	-1.79217	1454803_a_at
Hscb	HscB iron-sulfur cluster co-chaperone homolog (E. coli)	-1.79212	1427927_at
Svil	supervillin	-1.79008	1460694_s_at
Zfp623	zinc finger protein 623	-1.78927	1426625_at
Magi2	membrane associated guanylate kinase, WW and PDZ domain containing 2	-1.78845	1454855_at
1110020G09Rik	RIKEN cDNA 1110020G09 gene	-1.78764	1437286_x_at
Tnk1	tyrosine kinase, non-receptor, 1	-1.78481	1422721_at
Tmem53	transmembrane protein 53	-1.78417	1451479_a_at
Ndfip1	Nedd4 family interacting protein 1	-1.78287	1424821_at
Txnip	thioredoxin interacting protein	-1.78224	1415996_at
Frs3	fibroblast growth factor receptor substrate 3	-1.78101	1424449_at
Osbpl9	oxysterol binding protein-like 9	-1.77833	1439283_at
Hspa12b	heat shock protein 12B	-1.77744	1460371_at
Rnaseh1	ribonuclease H1	-1.77741	1453833_a_at
Arid4b	AT rich interactive domain 4B (RBP1-like)	-1.77707	1431024_a_at
4933407H18Rik	RIKEN cDNA 4933407H18 gene	-1.77593	1439495_at
Ppap2b	phosphatidic acid phosphatase type 2B	-1.7753	1429514_at
St7	Suppression of tumorigenicity 7	-1.77318	1418967_a_at
Axud1	AXIN1 up-regulated 1	-1.77169	1434350_at
Ppapdc3	phosphatidic acid phosphatase type 2 domain containing 3	-1.76748	1424362_at
Taf8	TAF8 RNA polymerase II, TATA box binding protein (TBP)-associated factorq	-1.7661	1416451_s_at
Bms1	BMS1 homolog, ribosome assembly protein (yeast)	-1.76571	1433636_at
Gpr137b-ps	G protein-coupled receptor 137B, pseudogene	-1.76427	1439256_x_at
2210010L05Rik	RIKEN cDNA 2210010L05 gene	-1.76203	1424464_s_at
Arsk	arylsulfatase K	-1.76167	1453108_at
Hgsnat	heparan-alpha-glucosaminide N-acetyltransferase	-1.75903	1450868_at
Rab3il1	RAB3A interacting protein (rabin3)-like 1	-1.75793	1428391_at
Sema4a	sema domain, immunoglobulin domain (Ig), transmembrane domain (TM) and short cytoplasmic domain, (semaphorin) 4A	-1.75397	1438934_x_at
Ick	intestinal cell kinase	-1.75357	1455687_at
Tatdn3	TatD DNase domain containing 3	-1.75208	1428769_at
3110001A13Rik	RIKEN cDNA 3110001A13 gene	-1.74969	1416892_s_at
Ccny	cyclin Y	-1.74785	1452984_at
Igh-6	immunoglobulin heavy chain 6 (heavy chain of IgM)	-1.74695	1427329_a_at
Bbs10	Bardet-Biedl syndrome 10 (human)	-1.74492	1440787_s_at
Glo1	glyoxalase 1	-1.74413	1436070_at
Ppp1r9a	protein phosphatase 1, regulatory (inhibitor) subunit 9A	-1.74405	1440285_at
Gprin2	G protein regulated inducer of neurite outgrowth 2	-1.74299	1443997_at
Dnahc1	dynein, axonemal, heavy chain 1	-1.74134	1434594_at
Mylk	myosin, light polypeptide kinase	-1.73614	1425506_at
Reps2	RALBP1 associated Eps domain containing protein 2	-1.7348	1435389_at
Cacna1d	calcium channel, voltage-dependent, L type, alpha 1D subunit	-1.73314	1427974_s_at
Tlr4	toll-like receptor 4	-1.73277	1418163_at
Large	like-glycosyltransferase	-1.73214	1417435_at
4930504E06Rik	RIKEN cDNA 4930504E06 gene	-1.73027	1438321_x_at
Bbs1	Bardet-Biedl syndrome 1 (human)	-1.72983	1437310_at
Samd9l	sterile alpha motif domain containing 9-like	-1.72883	1455581_x_at
EG434179	predicted gene, EG434179	-1.72848	1439295_x_at
E2f5	E2F transcription factor 5	-1.72697	1460207_s_at
Fsip1	fibrous sheath-interacting protein 1	1.50006	1428035_at
Zbtb7c	zinc finger and BTB domain containing 7C	1.50041	1425819_at
Wdr37	WD repeat domain 37	1.50617	1432614_at
Rnf26	ring finger protein 26	1.51517	1436824_x_at
Zfx	zinc finger protein X-linked	1.52214	1428046_a_at
Cyb5r2	cytochrome b5 reductase 2	1.526	1459448_at
Plac8	placenta-specific 8	1.53096	1451335_at
Pitpnb	phosphatidylinositol transfer protein, beta	1.53392	1434257_s_at
Mki67	antigen identified by monoclonal antibody Ki 67	1.53843	1426817_at
Hars	histidyl-tRNA synthetase	1.55156	1438510_a_at
Ubash3a	ubiquitin associated and SH3 domain containing, A	1.5547	1456065_at
Hsd17b14	hydroxysteroid (17-beta) dehydrogenase 14	1.55511	1447678_at
6820431F20Rik	RIKEN cDNA 6820431F20 gene	1.55923	1452997_at
Dcps	decapping enzyme, scavenger	1.55924	1456571_at
5730405O12Rik	RIKEN cDNA 5730405O12 gene	1.56025	1454379_at
H2-Q8	histocompatibility 2, Q region locus 8	1.5734	1430802_at
Nans	N-acetylneuraminic acid synthase (sialic acid synthase)	1.57413	1417773_at
Blm	Bloom syndrome homolog (human)	1.57765	1448953_at
Fcgr1	Fc receptor, IgG, high affinity I	1.57956	1436625_at
4921506M07Rik	RIKEN cDNA 4921506M07 gene	1.57997	1431730_at
Rad51ap1	RAD51 associated protein 1	1.5862	1417938_at
Ercc6l	excision repair cross-complementing rodent repair deficiency complementation group 6 - like	1.58677	1424766_at
2010109A12Rik	RIKEN cDNA 2010109A12 gene	1.59107	1430895_at
Dnmt1	DNA methyltransferase (cytosine-5) 1	1.59487	1435122_x_at
Ywhaz	tyrosine 3-monooxygenase/tryptophan 5-monooxygenase activation protein, zeta polypeptide	1.59695	1448218_s_at
A430108E01Rik	RIKEN cDNA A430108E01 gene	1.59713	1438049_at
5830444B04Rik	RIKEN cDNA 5830444B04 gene	1.60138	1439512_at
D11Ertd717e	DNA segment, Chr 11, ERATO Doi 717, expressed	1.60244	1457579_at
Eif2b1	eukaryotic translation initiation factor 2B, subunit 1 (alpha)	1.6032	1460730_at
Myo15b	myosin XVB	1.60324	1427203_at
AU022252	expressed sequence AU022252	1.60456	1438226_at
Derl2	Der1-like domain family, member 2	1.60613	1448438_at
Ncaph	non-SMC condensin I complex, subunit H	1.60688	1436707_x_at
Tuba8	tubulin, alpha 8	1.60841	1419518_at
Cks2	CDC28 protein kinase regulatory subunit 2	1.61742	1417457_at
Psmb5	proteasome (prosome, macropain) subunit, beta type 5	1.6191	1415676_a_at
Zfp64	zinc finger protein 64	1.61958	1456431_at
2310061C15Rik	RIKEN cDNA 2310061C15 gene	1.62139	1452597_at
Usp40	ubiquitin specific peptidase 40	1.62227	1435901_at
Chchd3	coiled-coil-helix-coiled-coil-helix domain containing 3	1.62648	1451504_at
Itga2b	integrin alpha 2b	1.62812	1417758_at
Mtch2	mitochondrial carrier homolog 2 (C. elegans)	1.62904	1430474_a_at
Atf6	activating transcription factor 6	1.63133	1435444_at
Syngr1	synaptogyrin 1	1.63293	1419289_a_at
Upb1	ureidopropionase, beta	1.63415	1460244_at
Polr3k	polymerase (RNA) III (DNA directed) polypeptide K	1.63441	1422753_a_at
Plk4	polo-like kinase 4 (Drosophila)	1.64525	1426580_at
Cotl1	coactosin-like 1 (Dictyostelium)	1.64704	1436236_x_at
Rrbp1	ribosome binding protein 1	1.64916	1436660_at
Tcra	T-cell receptor alpha chain	1.65038	1426168_a_at
Acvr1b	activin A receptor, type 1B	1.6509	1433725_at
1700051K22Rik	RIKEN cDNA 1700051K22 gene	1.65092	1447821_at
Zbtb46	zinc finger and BTB domain containing 46	1.65221	1440489_at
Zfp568	zinc finger protein 568	1.65253	1459929_at
Ing5	inhibitor of growth family, member 5	1.65599	1442094_at
Rftn2	raftlin family member 2	1.65931	1452946_a_at
Snap23	synaptosomal-associated protein 23	1.66057	1420897_at
Foxn4	forkhead box N4	1.6609	1425254_at
C530044C16Rik	RIKEN cDNA C530044C16 gene	1.66313	1445247_at
Cyp4a14	cytochrome P450, family 4, subfamily a, polypeptide 14	1.66404	1423257_at
Hip1r	huntingtin interacting protein 1 related	1.66549	1425551_at
OTTMUSG00000002879	predicted gene, OTTMUSG00000002879	1.66814	1442917_at
Lgals1	lectin, galactose binding, soluble 1	1.66849	1419573_a_at
Eme1	essential meiotic endonuclease 1 homolog 1 (S. pombe)	1.66928	1435054_at
Cotl1	coactosin-like 1 (Dictyostelium)	1.66937	1436838_x_at
Nfix	nuclear factor I/X	1.67146	1451443_at
2410014A08Rik	RIKEN cDNA 2410014A08 gene	1.67217	1436509_at
Pank2	pantothenate kinase 2 (Hallervorden-Spatz syndrome)	1.67388	1458358_at
Mgat5	mannoside acetylglucosaminyltransferase 5	1.67502	1428644_at
Ifi202b	interferon activated gene 202B	1.68049	1457666_s_at
Anln	anillin, actin binding protein	1.68112	1433543_at
Sptlc2	serine palmitoyltransferase, long chain base subunit 2	1.6858	1454257_at
Cenpn	centromere protein N	1.68804	1452305_s_at
Aurka	aurora kinase A	1.69416	1424511_at
Dusp12	dual specificity phosphatase 12	1.6948	1420636_a_at
Thyn1	thymocyte nuclear protein 1	1.69493	1438769_a_at
Rrm2	ribonucleotide reductase M2	1.69594	1434437_x_at
Skiv2l2	superkiller viralicidic activity 2-like 2 (S. cerevisiae)	1.69755	1447517_at
Calml3	calmodulin-like 3	1.6976	1418608_at
Ubap1	ubiquitin-associated protein 1	1.69852	1457074_at
Comt1	catechol-O-methyltransferase 1	1.6993	1449183_at
Elf5	E74-like factor 5	1.70166	1419555_at
Nudt4	nudix (nucleoside diphosphate linked moiety X)-type motif 4	1.70206	1449107_at
Taf9	TAF9 RNA polymerase II, TATA box binding protein (TBP)-associated factor	1.7039	1451509_at
Zfp593	zinc finger protein 593	1.71253	1447703_x_at
Trim37	tripartite motif-containing 37	1.71758	1436394_at
Txnl4a	thioredoxin-like 4A	1.71767	1419179_at
Tex9	testis expressed gene 9	1.71815	1444769_at
Dscaml1	Down syndrome cell adhesion molecule-like 1	1.7198	1427734_a_at
Kpna2	karyopherin (importin) alpha 2	1.72475	1415860_at
Snx27	sorting nexin family member 27	1.73009	1430037_at
Thsd4	thrombospondin, type I, domain containing 4	1.73047	1442552_at
AA409316	expressed sequence AA409316	1.73503	1452273_at
Polr2a	polymerase (RNA) II (DNA directed) polypeptide A	1.73571	1422311_a_at
Pex5l	peroxisomal biogenesis factor 5-like	1.73944	1446144_at
Serbp1	Serpine1 mRNA binding protein 1	1.74559	1440195_at
Atad2	ATPase family, AAA domain containing 2	1.74628	1436174_at
Klrg2	killer cell lectin-like receptor subfamily G, member 2	1.74668	1430606_at
Ssr1	signal sequence receptor, alpha	1.7494	1417764_at
Gbgt1	globoside alpha-1,3-N-acetylgalactosaminyltransferase 1	1.75144	1426148_at
Car9	carbonic anhydrase 9	1.75175	1427013_at
Cpa5	carboxypeptidase A5	1.75309	1427995_at
Xpo5	exportin 5	1.75322	1428560_at
1110013L07Rik	RIKEN cDNA 1110013L07 gene	1.75396	1454893_at
Rprd2	Regulation of nuclear pre-mRNA domain containing 2	1.75506	1453371_at
Arih1	ariadne ubiquitin-conjugating enzyme E2 binding protein homolog 1 (Drosophila)	1.75572	1436498_at
Rfc4	replication factor C (activator 1) 4	1.75711	1438161_s_at
Shisa2	shisa homolog 2 (Xenopus laevis)	1.75716	1423852_at
Cdca2	cell division cycle associated 2	1.76207	1437251_at
1700008O03Rik	RIKEN cDNA 1700008O03 gene	1.76281	1458662_at
Tifab	TRAF-interacting protein with forkhead-associated domain, family member B	1.76541	1436397_at
Slc12a7	solute carrier family 12, member 7	1.76979	1449011_at
Gosr2	golgi SNAP receptor complex member 2	1.76997	1419372_at
E330016A19Rik	RIKEN cDNA E330016A19 gene	1.77098	1440299_at
Sgol1	shugoshin-like 1 (S. pombe)	1.77138	1418919_at
Cdk6	cyclin-dependent kinase 6	1.77412	1435338_at
Atp13a3	ATPase type 13A3	1.77595	1434513_at
2810417H13Rik	RIKEN cDNA 2810417H13 gene	1.77768	1419153_at
Cdca8	cell division cycle associated 8	1.77928	1436847_s_at
Mtdh	Metadherin	1.78185	1434883_at
Ubl4	ubiquitin-like 4	1.78499	1424538_at
Ankrd29	ankyrin repeat domain 29	1.78782	1436294_at
Slco3a1	solute carrier organic anion transporter family, member 3a1	1.79102	1448918_at
Hspa8	heat shock protein 8	1.79225	1431182_at
Exod1	exonuclease domain containing 1	1.7927	1435390_at
Vav2	vav 2 oncogene	1.79665	1421272_at
Cit	citron	1.79682	1426028_a_at
Pnpla6	patatin-like phospholipase domain containing 6	1.7993	1427379_at
Seh1l	SEH1-like (S. cerevisiae	1.80217	1424199_at
Farsb	phenylalanyl-tRNA synthetase, beta subunit	1.80653	1423709_s_at
Raver1	ribonucleoprotein, PTB-binding 1	1.81342	1427111_s_at
Enc1	ectodermal-neural cortex 1	1.81812	1420965_a_at
Cenpn	centromere protein N	1.82289	1427105_at
Cenpk	centromere protein K	1.82678	1418264_at
Ccnb1-rs1	cyclin B1, related sequence 1	1.82846	1448205_at
Vhl	von Hippel-Lindau syndrome	1.829	1421071_at
S1pr1	sphingosine-1-phosphate receptor 1	1.83231	1423571_at
Cdca8	cell division cycle associated 8	1.83269	1428481_s_at
Tmem144	transmembrane protein 144	1.83348	1426362_at
Ola1	Obg-like ATPase 1	1.83686	1432151_at
Tacc3	transforming, acidic coiled-coil containing protein 3	1.83728	1436872_at
E2f8	E2F transcription factor 8	1.8386	1436186_at
Rab6b	RAB6B, member RAS oncogene family	1.83961	1460617_s_at
Tm6sf1	transmembrane 6 superfamily member 1	1.84189	1451353_at
Endod1	endonuclease domain containing 1	1.8484	1426540_at
Tle1	transducin-like enhancer of split 1, homolog of Drosophila E(spl)	1.85173	1422751_at
Nans	N-acetylneuraminic acid synthase (sialic acid synthase)	1.85203	1417774_at
Cdca3	cell division cycle associated 3	1.85289	1452040_a_at
Dctn4	dynactin 4	1.85318	1458541_at
Ifi203	interferon activated gene 203	1.85351	1451567_a_at
Pdss1	prenyl (solanesyl) diphosphate synthase, subunit 1	1.85391	1431893_a_at
Runx1	runt related transcription factor 1	1.85481	1440878_at
Itga9	integrin alpha 9	1.85541	1450029_s_at
Ubash3a	ubiquitin associated and SH3 domain containing, A	1.85659	1431698_at
Snhg3	small nucleolar RNA host gene (non-protein coding) 3	1.85777	1433789_at
Dbf4	DBF4 homolog (S. cerevisiae)	1.86508	1418334_at
Vps37b	vacuolar protein sorting 37B (yeast)	1.8667	1424380_at
2310043N10Rik	RIKEN cDNA 2310043N10 gene	1.8668	1428083_at
2510019K15Rik	RIKEN cDNA 2510019K15 gene	1.87072	1432650_at
Rcn2	reticulocalbin 2	1.87143	1444248_at
Mrpl19	mitochondrial ribosomal protein L19	1.87392	1421914_s_at
Ptgir	prostaglandin I receptor (IP)	1.87405	1427313_at
1110028C15Rik	RIKEN cDNA 1110028C15 gene	1.8742	1416706_at
Ms4a6c	membrane-spanning 4-domains, subfamily A, member 6C	1.87485	1450234_at
Rasgrf1	RAS protein-specific guanine nucleotide-releasing factor 1	1.87661	1459056_at
Cyp2j13	cytochrome P450, family 2, subfamily j, polypeptide 13	1.87761	1426102_at
Nme6	non-metastatic cells 6, protein expressed in (nucleoside-diphosphate kinase)	1.88263	1448574_at
Ap1s2	adaptor-related protein complex 1, sigma 2 subunit	1.88464	1447903_x_at
1500015A07Rik	RIKEN cDNA 1500015A07 gene	1.88833	1429162_at
C430004E15Rik	RIKEN cDNA C430004E15 gene	1.88941	1426809_at
4921511H13Rik	RIKEN cDNA 4921511H13 gene	1.89017	1453999_at
Spata3	spermatogenesis associated 3	1.89046	1432375_a_at
Slc25a44	solute carrier family 25, member 44	1.89048	1456465_at
Hmga2	high mobility group AT-hook 2	1.89218	1450780_s_at
Prim2	DNA primase, p58 subunit	1.89401	1418036_at
Runx1	runt related transcription factor 1	1.89694	1422864_at
Ect2	ect2 oncogene	1.89815	1419513_a_at
Aspm	asp (abnormal spindle)-like, microcephaly associated (Drosophila)	1.90041	1422814_at
Gng12	guanine nucleotide binding protein (G protein), gamma 12	1.90096	1421947_at
Kif2c	kinesin family member 2C	1.90136	1437611_x_at
2700078K21Rik	RIKEN cDNA 2700078K21 gene	1.9038	1432419_a_at
Atm	ataxia telangiectasia mutated homolog (human)	1.90998	1421205_at
Tmprss3	transmembrane protease, serine 3	1.91239	1421714_at
Dmtf1	cyclin D binding myb-like transcription factor 1	1.91972	1439376_x_at
H2afx	H2A histone family, member X	1.92318	1416746_at
Cnn3	calponin 3, acidic	1.92843	1456380_x_at
Parp3	poly (ADP-ribose) polymerase family, member 3	1.93161	1445888_x_at
H2afj	H2A histone family, member J	1.93237	1440252_at
Kif20a	kinesin family member 20A	1.93265	1449207_a_at
Cdc2a	cell division cycle 2 homolog A (S. pombe)	1.9385	1448314_at
Kif4	kinesin family member 4	1.93868	1450692_at
Erlin1	ER lipid raft associated 1	1.94	1441344_at
Mrps5	mitochondrial ribosomal protein S5	1.94774	1447628_x_at
Csf3r	colony stimulating factor 3 receptor (granulocyte)	1.94786	1418806_at
Clec4e	C-type lectin domain family 4, member e	1.95068	1420330_at
5830443J22Rik	RIKEN cDNA 5830443J22 gene	1.95207	1429902_at
Lpcat2	lysophosphatidylcholine acyltransferase 2	1.95327	1440684_at
2900010J23Rik	RIKEN cDNA 2900010J23 gene	1.95451	1433480_at
1110028C15Rik	RIKEN cDNA 1110028C15 gene	1.9553	1416705_at
6820431F20Rik	RIKEN cDNA 6820431F20 gene	1.95555	1429040_at
1110014N23Rik	RIKEN cDNA 1110014N23 gene	1.95654	1438205_at
Clec4d	C-type lectin domain family 4, member d	1.96686	1420804_s_at
Cenpf	centromere protein F	1.96947	1427161_at
Prkar2b	protein kinase, cAMP dependent regulatory, type II beta	1.96995	1430640_a_at
Ccnb1-rs1	cyclin B1, related sequence 1	1.97145	1416076_at
Suhw4	suppressor of hairy wing homolog 4 (Drosophila)	1.97262	1457455_at
Gins4	GINS complex subunit 4 (Sld5 homolog)	1.98623	1417913_at
Zc3h4	zinc finger CCCH-type containing 4	1.99476	1457458_at
Fancd2	Fanconi anemia, complementation group D2	1.99878	1439091_at
Ncaph	non-SMC condensin I complex, subunit H	1.99907	1423920_at
Stx3	syntaxin 3	2.00143	1425536_at
Ifi205	interferon activated gene 205	2.00898	1452348_s_at
Slc35d3	solute carrier family 35, member D3	2.01349	1428642_at
Slc22a3	solute carrier family 22 (organic cation transporter), member 3	2.0176	1420444_at
Pmf1	polyamine-modulated factor 1	2.02277	1438173_x_at
Gm885	gene model 885, (NCBI)	2.0266	1445687_at
Slc16a10	solute carrier family 16 (monocarboxylic acid transporters), member 10	2.03626	1436368_at
C330011K17Rik	RIKEN cDNA C330011K17 gene	2.04339	1434171_at
Csf1r	colony stimulating factor 1 receptor	2.04488	1419873_s_at
Hist1h2ae	histone cluster 1, H2ae	2.05313	1438009_at
Kctd3	potassium channel tetramerisation domain containing 3	2.05598	1459353_at
Exo1	exonuclease 1	2.05804	1418026_at
Arhgap19	Rho GTPase activating protein 19	2.06206	1434911_s_at
Nkg7	natural killer cell group 7 sequence	2.06679	1450753_at
Tuba8	tubulin, alpha 8	2.07122	1446771_at
Cnn3	calponin 3, acidic	2.07934	1426724_at
Krt80	keratin 80	2.08007	1419619_at
Tspan2	tetraspanin 2	2.09425	1432417_a_at
2210020M01Rik	RIKEN cDNA 2210020M01 gene	2.09734	1435378_at
1810037I17Rik	RIKEN cDNA 1810037I17 gene	2.10087	1424365_at
6720463M24Rik	RIKEN cDNA 6720463M24 gene	2.10131	1429478_at
Hist2h3c1	histone cluster 2, H3c1	2.10723	1453573_at
4922501C03Rik	RIKEN cDNA 4922501C03 gene	2.11214	1442733_at
Ckap2l	cytoskeleton associated protein 2-like	2.11592	1435938_at
Top2a	topoisomerase (DNA) II alpha	2.11631	1442454_at
Rnase4	ribonuclease, RNase A family 4	2.13503	1422603_at
4930515G01Rik	RIKEN cDNA 4930515G01 gene	2.13598	1438869_at
Hist1h2bp	histone cluster 1, H2bp	2.14028	1427762_x_at
EG240038	predicted gene, EG240038	2.14043	1444589_at
Gpr97	G protein-coupled receptor 97	2.14204	1417894_at
Fcgr2b	Fc receptor, IgG, low affinity IIb	2.14503	1435476_a_at
Tgfb1	transforming growth factor, beta 1	2.15178	1420653_at
Cxxc4	CXXC finger 4	2.15313	1438304_at
Ccnb1	cyclin B1	2.16911	1419943_s_at
Rgs10	regulator of G-protein signalling 10	2.17664	1416882_at
Psca	prostate stem cell antigen	2.18667	1451258_at
Rps25	ribosomal protein S25	2.18918	1430978_at
Csf2rb	colony stimulating factor 2 receptor, beta, low-affinity (granulocyte-macrophage)	2.19275	1455660_at
Mbnl3	muscleblind-like 3 (Drosophila)	2.19376	1442549_at
Herc5	hect domain and RLD 5	2.19865	1432026_a_at
Tia1	cytotoxic granule-associated RNA binding protein 1	2.20049	1431708_a_at
Ncapd2	non-SMC condensin I complex, subunit D2	2.20849	1430010_at
Plek	pleckstrin	2.20869	1417523_at
Tm6sf1	transmembrane 6 superfamily member 1	2.21146	1424443_at
Rpl31	ribosomal protein L31	2.21731	1420381_a_at
Cenpf	centromere protein F	2.22126	1458447_at
Cenpa	centromere protein A	2.22515	1450842_a_at
Fcgr2b	Fc receptor, IgG, low affinity IIb	2.23285	1455332_x_at
Mpo	myeloperoxidase	2.24533	1415960_at
Fancd2	Fanconi anemia, complementation group D2	2.24774	1438339_at
Fancc	Fanconi anemia, complementation group C	2.25663	1450861_at
130004C03	hypothetical LOC403343	2.26104	1442992_at
2610036L11Rik	RIKEN cDNA 2610036L11 gene	2.28562	1453053_at
Fcgr3	Fc receptor, IgG, low affinity III	2.29957	1448620_at
Hp	haptoglobin	2.3026	1448881_at
Cdc25c	cell division cycle 25 homolog C (S. pombe)	2.30298	1456077_x_at
Spata5l1	spermatogenesis associated 5-like 1	2.32806	1455863_at
Dntt	deoxynucleotidyltransferase, terminal	2.37203	1449757_x_at
Depdc6	DEP domain containing 6	2.37619	1443579_s_at
Rpl17	ribosomal protein L17	2.38006	1453752_at
6430706D22Rik	RIKEN cDNA 6430706D22 gene	2.40982	1451456_at
Ncf4	neutrophil cytosolic factor 4	2.42386	1418465_at
Mtmr9	myotubularin related protein 9	2.43624	1452254_at
5830405N20Rik	RIKEN cDNA 5830405N20 gene	2.45674	1439981_at
Gnb4	guanine nucleotide binding protein (G protein), beta 4	2.4575	1419469_at
Depdc6	DEP domain containing 6	2.46703	1453571_at
5830407E08Rik	RIKEN cDNA 5830407E08 gene	2.4749	1429673_at
Hist1h3a	histone cluster 1, H3a	2.5209	1422948_s_at
4633401B06Rik	RIKEN cDNA 4633401B06 gene	2.524	1429822_at
H60a	histocompatibility 60a	2.52731	1440145_at
Nlrc3	NLR family, CARD domain containing 3	2.5447	1458148_at
Treml1	triggering receptor expressed on myeloid cells-like 1	2.55499	1452630_at
Terf1	telomeric repeat binding factor 1	2.56918	1443527_at
Ppcdc	phosphopantothenoylcysteine decarboxylase	2.576	1424336_at
AI447881	expressed sequence AI447881	2.58026	1445647_at
Dntt	deoxynucleotidyltransferase, terminal	2.68218	1420166_at
Ube2c	ubiquitin-conjugating enzyme E2C	2.6849	1452954_at
5830405N20Rik	RIKEN cDNA 5830405N20 gene	2.70024	1428959_at
Hist1h1e	histone cluster 1, H1e	2.70912	1422398_at
Gfer	growth factor, erv1 (S. cerevisiae)-like (augmenter of liver regeneration)	2.72302	1452272_a_at
Eme2	essential meiotic endonuclease 1 homolog 2 (S. pombe)	2.73374	1460628_at
Vpreb1	pre-B lymphocyte gene 1	2.73523	1449869_at
BC035044	cDNA sequence BC035044	2.75971	1434929_at
Tsc22d1	TSC22 domain family, member 1	2.7643	1447360_at
Gnai2	guanine nucleotide binding protein (G protein), alpha inhibiting 2	2.80609	1419449_a_at
Cep192	centrosomal protein 192	2.80999	1440081_at
Rbm28	RNA binding motif protein 28	2.829	1452091_a_at
Greb1	gene regulated by estrogen in breast cancer protein	2.84533	1439568_at
Ermap	erythroblast membrane-associated protein	2.84908	1418909_at
Glrp1	glutamine repeat protein 1	2.85543	1421732_at
Mtmr9	myotubularin related protein 9	2.86279	1434676_at
Klf1	Kruppel-like factor 1 (erythroid)	2.87596	1418600_at
Rhobtb3	Rho-related BTB domain containing 3	2.87657	1447869_x_at
Cst7	cystatin F (leukocystatin)	2.88442	1419202_at
Rfx7	regulatory factor X, 7	2.96469	1460567_at
1190002F15Rik	RIKEN cDNA 1190002F15 gene	2.98259	1441757_at
Ibtk	inhibitor of Bruton agammaglobulinemia tyrosine kinase	3.0023	1454905_at
Hmga2	high mobility group AT-hook 2	3.00421	1422851_at
Mlh1	mutL homolog 1 (E. coli)	3.0543	1417360_at
Gna14	guanine nucleotide binding protein, alpha 14	3.08053	1420385_at
Sypl	synaptophysin-like protein	3.08095	1435082_at
Hist1h2bp	histone cluster 1, H2bp	3.15692	1452540_a_at
Mns1	meiosis-specific nuclear structural protein 1	3.16397	1419402_at
Rrm2	ribonucleotide reductase M2	3.18415	1448226_at
Sdhc	succinate dehydrogenase complex, subunit C, integral membrane protein	3.23934	1448630_a_at
Vmn2r84	vomeronasal 2, receptor 84	3.30439	1442282_at
Zfp429	zinc finger protein 429	3.30972	1439475_at
Siglec5	sialic acid binding Ig-like lectin 5	3.39035	1424975_at
Comt1	catechol-O-methyltransferase 1	3.4073	1418701_at
Hmga2-ps1	high mobility group AT-hook 2, pseudogene 1	3.4295	1440559_at
Ctsg	cathepsin G	3.44022	1419594_at
Gna14	guanine nucleotide binding protein, alpha 14	3.44596	1449848_at
40070	septin 14	3.50885	1447063_at
Dntt	deoxynucleotidyltransferase, terminal	3.53857	1450545_a_at
Cpa3	carboxypeptidase A3, mast cell	3.5539	1448730_at
Lman1	lectin, mannose-binding, 1	3.55413	1444037_at
Csf1r	colony stimulating factor 1 receptor	3.56585	1419872_at
Col5a1	collagen, type V, alpha 1	3.70492	1416740_at
Kif23	kinesin family member 23	3.81571	1455990_at
Cenpa	centromere protein A	3.9104	1444416_at
Gm1964	gene model 1964, (NCBI)	4.07005	1442000_at
Reln	reelin	4.18816	1449465_at
Arsk	arylsulfatase K	4.2199	1453109_at
Sell	selectin, lymphocyte	4.30397	1419480_at
LOC100047856	similar to calponin 3, acidic	4.33291	1436836_x_at
Hist2h3c1	histone cluster 2, H3c1	4.47792	1460314_s_at
Hmga2	high mobility group AT-hook 2	4.50238	1450781_at
LOC100047856	similar to calponin 3, acidic	4.53386	1436759_x_at
Sell	selectin, lymphocyte	4.75166	1419481_at
Mtmr9	myotubularin related protein 9	4.86926	1455058_at
Fgf3	fibroblast growth factor 3	5.39819	1441350_at
Gna14	guanine nucleotide binding protein, alpha 14	5.46633	1447791_s_at
Mapk8	mitogen-activated protein kinase 8	5.54545	1457936_at
BC023892	cDNA sequence BC023892	5.81644	1437868_at
Tcra	T-cell receptor alpha chain	5.8897	1426113_x_at
Fcgr2b	Fc receptor, IgG, low affinity IIb	6.0544	1435477_s_at
Cd48	CD48 antigen	7.09926	1427301_at
A630033E08Rik	RIKEN cDNA A630033E08 gene	7.50553	1437128_a_at
F13a1	coagulation factor XIII, A1 subunit	7.6743	1448929_at
Parp3	poly (ADP-ribose) polymerase family, member 3	9.37671	1451969_s_at
D730035F11Rik	RIKEN cDNA D730035F11 gene	10.5326	1457163_at
Fgf3	fibroblast growth factor 3	11.0179	1441914_x_at
Igh-6	immunoglobulin heavy chain 6 (heavy chain of IgM)	31.8683	1451632_a_at
