# Supplementary material for: Runx1 Loss Minimally Impacts Long-Term Hematopoietic Stem Cells
Source: PLoS One. 2011 Dec 1;6(12):e28430. doi: 10.1371/journal.pone.0028430 (PMC3228772; doi:10.1371/journal.pone.0028430)
Supplement: Table S2 — Gene expression changes in LSKF- cells. Listed are changes >1.5 fold, with a significance threshold of 0.005. The data correspond to 2526 probesets and 2147 unique genes. (XLS) [file pone.0028430.s002.xls]

## Sheet: LSKF-
Gene symbol	Gene Name	Fold-change	Probe set		Runx1-deficient LSK Flt3- cells
Slc15a2	solute carrier family 15 (H+/peptide transporter), member 2	-25.0608	1417600_at		Significance threshold was 0.005 Fold change >1.5
Ndn	necdin	-23.946	1455792_x_at		2526 Probesets
Bex1	brain expressed gene 1	-12.6962	1448595_a_at		2147 unique genes
Ndn	necdin	-12.2456	1435382_at
Ndn	necdin	-12.0248	1437853_x_at
Ndn	necdin	-11.7564	1435383_x_at
Neo1	neogenin	-10.972	1447693_s_at
Alcam	activated leukocyte cell adhesion molecule	-8.98311	1437466_at
Tia1	cytotoxic granule-associated RNA binding protein 1	-8.96804	1431708_a_at
Nov	nephroblastoma overexpressed gene	-8.83094	1426852_x_at
Il18r1	interleukin 18 receptor 1	-8.53159	1421628_at
Serpinf1	serine (or cysteine) peptidase inhibitor, clade F, member 1	-7.55703	1416168_at
Il17re	interleukin 17 receptor E	-7.30581	1426566_s_at
8430419K02Rik	RIKEN cDNA 8430419K02 gene	-6.82523	1460515_at
Fgd5	FYVE, RhoGEF and PH domain containing 5	-6.6598	1460578_at
Maf	avian musculoaponeurotic fibrosarcoma (v-maf) AS42 oncogene homolog	-6.51313	1447849_s_at
Fscn1	fascin homolog 1, actin bundling protein (Strongylocentrotus purpuratus)	-6.50775	1416514_a_at
Fhl1	four and a half LIM domains 1	-6.45097	1417872_at
Mpzl1	myelin protein zero-like 1	-6.26238	1428167_a_at
Zfp612	zinc finger protein 612	-6.25521	1427104_at
Ldhb	lactate dehydrogenase B	-6.04922	1434499_a_at
LOC100048050	similar to calcium-independent alpha-latrotoxin receptor homolog 2	-6.01049	1434112_at
Rpgrip1	retinitis pigmentosa GTPase regulator interacting protein 1	-5.97312	1454231_a_at
Cd72	CD72 antigen	-5.9136	1426112_a_at
Speg	SPEG complex locus	-5.7599	1448664_a_at
Eps8l1	EPS8-like 1	-5.72655	1431821_a_at
Igj	immunoglobulin joining chain	-5.7075	1424305_at
Leprel2	leprecan-like 2	-5.40196	1449531_at
Prdm16	PR domain containing 16	-5.23681	1440870_at
Tmem191c	transmembrane protein 191C	-5.14564	1420192_at
Fkbp9	FK506 binding protein 9	-5.05475	1437687_x_at
Igk-V1	immunoglobulin kappa chain variable 1 (V1)	-5.01927	1452463_x_at
Cd200	Cd200 antigen	-4.96622	1448788_at
Sox6	SRY-box containing gene 6	-4.78846	1447655_x_at
Ldhb	lactate dehydrogenase B	-4.63847	1448237_x_at
Dsg2	desmoglein 2	-4.6208	1449740_s_at
Cadps2	Ca2+-dependent activator protein for secretion 2	-4.61783	1451499_at
Ppargc1a	peroxisome proliferative activated receptor, gamma, coactivator 1 alpha	-4.60884	1460336_at
Mmrn1	multimerin 1	-4.44189	1437260_at
Zfp618	zinc fingerprotein 618	-4.42834	1455591_at
ENSMUSG00000068790	predicted gene, ENSMUSG00000068790	-4.42104	1428301_at
Alcam	activated leukocyte cell adhesion molecule	-4.32687	1426301_at
Irf6	interferon regulatory factor 6	-4.31819	1418301_at
Cdcp1	CUB domain containing protein 1	-4.31096	1427095_at
1500009L16Rik	RIKEN cDNA 1500009L16 gene	-4.2923	1452840_at
Inadl	InaD-like (Drosophila)	-4.27322	1418983_at
Mpp4	membrane protein, palmitoylated 4 (MAGUK p55 subfamily member 4)	-4.21418	1460368_at
Klhl4	kelch-like 4 (Drosophila)	-4.18902	1439078_at
Igh-6	immunoglobulin heavy chain 6 (heavy chain of IgM)	-4.15089	1427329_a_at
ENSMUSG00000068790	predicted gene, ENSMUSG00000068790	-4.12809	1452731_x_at
Pdzk1ip1	PDZK1 interacting protein 1	-4.1261	1455477_s_at
Pglyrp2	peptidoglycan recognition protein 2	-4.08094	1420515_a_at
Rpgrip1	retinitis pigmentosa GTPase regulator interacting protein 1	-3.99593	1421144_at
Tmem191c	transmembrane protein 191C	-3.94221	1420191_s_at
Hivep3	human immunodeficiency virus type I enhancer binding protein 3	-3.93895	1458802_at
Dsg2	desmoglein 2	-3.93293	1439476_at
St6gal1	beta galactoside alpha 2,6 sialyltransferase 1	-3.91609	1420928_at
Rnase4	ribonuclease, RNase A family 4	-3.87634	1438936_s_at
Nov	nephroblastoma overexpressed gene	-3.87476	1426851_a_at
Mpzl1	myelin protein zero-like 1	-3.84948	1428168_at
Sulf2	sulfatase 2	-3.83749	1447602_x_at
Nbea	neurobeachin	-3.82551	1452251_at
Flywch2	FLYWCH family member 2	-3.81357	1438982_s_at
2310026E23Rik	RIKEN cDNA 2310026E23 gene	-3.79349	1435351_at
Zfp69	zinc finger protein 69	-3.78412	1458274_at
Ldhb	lactate dehydrogenase B	-3.77394	1455235_x_at
Cd96	CD96 antigen	-3.76369	1419226_at
Vldlr	very low density lipoprotein receptor	-3.73834	1434465_x_at
Rhobtb3	Rho-related BTB domain containing 3	-3.7037	1433647_s_at
Igh-6	immunoglobulin heavy chain 6 (heavy chain of IgM)	-3.70156	1427351_s_at
9030425L15Rik	RIKEN cDNA 9030425L15 gene	-3.68625	1429977_at
Fap	fibroblast activation protein	-3.65904	1417552_at
Cyp7b1	cytochrome P450, family 7, subfamily b, polypeptide 1	-3.65458	1421075_s_at
Rilpl1	Rab interacting lysosomal protein-like 1	-3.64824	1447852_x_at
Spo11	sporulation protein, meiosis-specific, SPO11 homolog (S. cerevisiae)	-3.63275	1417021_a_at
EG331392	predicted gene, EG331392	-3.60085	1445504_at
100042603	predicted gene, 100042603	-3.59068	1459561_at
2900072G11Rik	RIKEN cDNA 2900072G11 gene	-3.5886	1429702_at
Chrnb1	cholinergic receptor, nicotinic, beta polypeptide 1 (muscle)	-3.58021	1420682_at
Nbeal2	neurobeachin-like 2	-3.57076	1455694_at
Sox6	SRY-box containing gene 6	-3.52244	1434918_at
Itih5	inter-alpha (globulin) inhibitor H5	-3.51897	1429159_at
9030619P08Rik	RIKEN cDNA 9030619P08 gene	-3.50444	1443889_at
2310050P20Rik	RIKEN cDNA 2310050P20 gene	-3.49775	1453841_at
2810416A17Rik	RIKEN cDNA 2810416A17 gene	-3.48085	1433266_at
Appl2	adaptor protein, phosphotyrosine interaction, PH domain and leucine zipper containing 2	-3.45831	1426743_at
Prkg1	protein kinase, cGMP-dependent, type I	-3.43981	1444232_at
Mpl	myeloproliferative leukemia virus oncogene	-3.4005	1421461_at					-3.44828
Alcam	activated leukocyte cell adhesion molecule	-3.3912	1437467_at
Ptprf	protein tyrosine phosphatase, receptor type, F	-3.38382	1420843_at
Wdr40b	WD repeat domain 40B	-3.3774	1434170_at
Six6os1	Six6 opposite strand transcript 1	-3.35043	1431393_at
Ghr	growth hormone receptor	-3.29501	1417962_s_at
Crispld1	cysteine-rich secretory protein LCCL domain containing 1	-3.27824	1423352_at
Tert	telomerase reverse transcriptase	-3.2738	1456941_at
5230400M03Rik	RIKEN cDNA 5230400M03 gene	-3.26618	1441843_s_at
Als2	amyotrophic lateral sclerosis 2 (juvenile) homolog (human)	-3.25975	1417783_at
Fkbp9	FK506 binding protein 9	-3.21191	1423677_at
Evi1	ecotropic viral integration site 1	-3.20914	1438325_at
B230317C12Rik	RIKEN cDNA B230317C12 gene	-3.1941	1417147_at
Pld2	phospholipase D2	-3.18379	1457252_x_at
Fgf3	fibroblast growth factor 3	-3.18332	1441914_x_at
Ldhb	lactate dehydrogenase B	-3.18168	1416183_a_at
2310010M24Rik	RIKEN cDNA 2310010M24 gene	-3.18072	1429274_at
EG434228	predicted gene, EG434228	-3.1789	1446893_at
Tmem191c	transmembrane protein 191C	-3.16753	1449770_x_at
Zfp532	zinc finger protein 532	-3.12513	1435669_at
Osbpl3	oxysterol binding protein-like 3	-3.11946	1438724_at
Cd244	CD244 natural killer cell receptor 2B4	-3.10999	1449991_at
Cc2d2a	coiled-coil and C2 domain containing 2A	-3.10039	1436426_at
Nfatc2	nuclear factor of activated T-cells, cytoplasmic, calcineurin-dependent 2	-3.09585	1439205_at
Tmem176a	transmembrane protein 176A	-3.09396	1425603_at
Vdr	vitamin D receptor	-3.08521	1418176_at
Vegfc	vascular endothelial growth factor C	-3.08312	1439766_x_at
LOC100048050	similar to calcium-independent alpha-latrotoxin receptor homolog 2	-3.05989	1434111_at
BC018465	cDNA sequence BC018465	-3.04718	1425046_at
Bgn	biglycan	-3.04067	1448323_a_at
6720401G13Rik	RIKEN cDNA 6720401G13 gene	-3.02704	1438916_x_at
Eml5	echinoderm microtubule associated protein like 5	-3.02346	1427484_at
Actb	actin, beta	-3.0121	1419734_at
Cabc1	chaperone, ABC1 activity of bc1 complex like (S. pombe)	-2.98459	1417067_s_at
Socs2	suppressor of cytokine signaling 2	-2.98244	1449109_at
Itm2a	integral membrane protein 2A	-2.97688	1423608_at
Aldoc	aldolase C, fructose-bisphosphate	-2.97058	1451461_a_at
D630039A03Rik	RIKEN cDNA D630039A03 gene	-2.9702	1437085_at
Socs2	suppressor of cytokine signaling 2	-2.96997	1418507_s_at
Inadl	InaD-like (Drosophila)	-2.96571	1418984_at
Gimap8	GTPase, IMAP family member 8	-2.96142	1456061_at
Ppic	peptidylprolyl isomerase C	-2.94919	1416498_at
Arhgef16	Rho guanine nucleotide exchange factor (GEF) 16	-2.94197	1427386_at
Vldlr	very low density lipoprotein receptor	-2.94187	1435893_at
Tle2	transducin-like enhancer of split 2, homolog of Drosophila E(spl)	-2.91991	1436244_a_at
LOC67527	murine leukemia retrovirus	-2.918	1431213_a_at
B3galt6	UDP-Gal:betaGal beta 1,3-galactosyltransferase, polypeptide 6	-2.90579	1435252_at
Prdm16	PR domain containing 16	-2.90045	1440745_at
Lck	lymphocyte protein tyrosine kinase	-2.88513	1425396_a_at
Procr	protein C receptor, endothelial	-2.8782	1420664_s_at
4930519L02Rik	RIKEN cDNA 4930519L02 gene	-2.86893	1454269_s_at
Asah3l	N-acylsphingosine amidohydrolase 3-like	-2.86414	1451355_at
D330040H18Rik	RIKEN cDNA D330040H18 gene	-2.85638	1444432_at
Flywch2	FLYWCH family member 2	-2.85334	1424494_s_at
Tpm2	tropomyosin 2, beta	-2.85134	1419738_a_at
Aire	autoimmune regulator (autoimmune polyendocrinopathy candidiasis ectodermal dystrophy)	-2.84953	1419241_a_at
Aph1b	anterior pharynx defective 1b homolog (C. elegans)	-2.84246	1456500_at
Ywhaz	tyrosine 3-monooxygenase/tryptophan 5-monooxygenase activation protein, zeta polypeptide	-2.8407	1436981_a_at
2700008G24Rik	RIKEN cDNA 2700008G24 gene	-2.83967	1453328_at
Pcbp2	poly(rC) binding protein 2	-2.83943	1438908_at
Ffar2	free fatty acid receptor 2	-2.83506	1425216_at
Synpo2	synaptopodin 2	-2.82729	1441206_at
Frmd4b	FERM domain containing 4B	-2.82356	1438169_a_at
Evc2	Ellis van Creveld syndrome 2 homolog (human)	-2.81887	1429447_at
Il18	interleukin 18	-2.81049	1417932_at
Dnase2a	deoxyribonuclease II alpha	-2.81031	1448986_x_at
Ints10	integrator complex subunit 10	-2.80659	1439712_at
Shmt1	serine hydroxymethyltransferase 1 (soluble)	-2.80379	1425177_at
Tpm2	tropomyosin 2, beta	-2.80324	1425028_a_at
Dst	dystonin	-2.7908	1423626_at
Snn	stannin	-2.78805	1452789_at
Bgn	biglycan	-2.78346	1416405_at
Grasp	GRP1 (general receptor for phosphoinositides 1)-associated scaffold protein	-2.78111	1441894_s_at
2900006B11Rik	RIKEN cDNA 2900006B11 gene	-2.7792	1430253_at
Gprc5b	G protein-coupled receptor, family C, group 5, member B	-2.77068	1451411_at
Ctsw	cathepsin W	-2.75377	1422632_at
Sox4	SRY-box containing gene 4	-2.7496	1419155_a_at
6720475J19Rik	RIKEN cDNA 6720475J19 gene	-2.74564	1423071_x_at
Trim47	tripartite motif-containing 47	-2.73953	1426784_at
Trim34	tripartite motif-containing 34	-2.73373	1426093_at
Map3k8	mitogen-activated protein kinase kinase kinase 8	-2.73245	1419208_at
Marcks	myristoylated alanine rich protein kinase C substrate	-2.72637	1456700_x_at
Il1r1	interleukin 1 receptor, type I	-2.71996	1448950_at
Acp2	acid phosphatase 2, lysosomal	-2.71496	1424654_at
Klhl13	kelch-like 13 (Drosophila)	-2.70431	1448269_a_at
Gprasp2	G protein-coupled receptor associated sorting protein 2	-2.70421	1434073_at
Pkia	protein kinase inhibitor, alpha	-2.69828	1420859_at
Il18rap	interleukin 18 receptor accessory protein	-2.69178	1456545_at
Acot11	acyl-CoA thioesterase 11	-2.68097	1429267_at
Vnn1	vanin 1	-2.67878	1447845_s_at
1110020C03Rik	RIKEN cDNA 1110020C03 gene	-2.67375	1429808_at
Slc2a1	solute carrier family 2 (facilitated glucose transporter), member 1	-2.66742	1434773_a_at
Icam1	intercellular adhesion molecule 1	-2.66457	1424067_at
Fgd2	FYVE, RhoGEF and PH domain containing 2	-2.6639	1419515_at
2310057J16Rik	RIKEN cDNA 2310057J16 gene	-2.65533	1432464_a_at
Robo4	roundabout homolog 4 (Drosophila)	-2.65527	1426206_at
Cyp2j9	cytochrome P450, family 2, subfamily j, polypeptide 9	-2.64956	1424677_at
H2-D1	histocompatibility 2, D region locus 1	-2.64678	1427726_at
ENSMUSG00000073019	predicted gene, ENSMUSG00000073019	-2.62374	1440522_at
Zfp30	zinc finger protein 30	-2.61315	1449813_at
5730507N06Rik	RIKEN cDNA 5730507N06 gene	-2.61212	1457642_at
Ttc39a	tetratricopeptide repeat domain 39A	-2.61177	1455162_at
Prkcdbp	protein kinase C, delta binding protein	-2.59963	1423771_at
Ppp1r9a	protein phosphatase 1, regulatory (inhibitor) subunit 9A	-2.5982	1456072_at
Hdac11	histone deacetylase 11	-2.59254	1454803_a_at
Med12l	mediator of RNA polymerase II transcription, subunit 12 homolog (yeast)-like	-2.58498	1441163_at
Ldhd	lactate dehydrogenase D	-2.57725	1428614_at
Arhgap29	Rho GTPase activating protein 29	-2.57683	1454745_at
Aspa	aspartoacylase	-2.57433	1418472_at
Spry2	sprouty homolog 2 (Drosophila)	-2.56901	1436584_at
Slc22a17	solute carrier family 22 (organic cation transporter), member 17	-2.56288	1448209_a_at
Dkkl1	dickkopf-like 1	-2.56285	1417787_at
Nupr1	nuclear protein 1	-2.55864	1419665_a_at
Lima1	LIM domain and actin binding 1	-2.55288	1450629_at
Grit	Rho GTPase-activating protein	-2.54483	1438451_at
Slc9a5	solute carrier family 9 (sodium/hydrogen exchanger), member 5	-2.54179	1455760_at
Cav2	caveolin 2	-2.53414	1417327_at
Vnn1	vanin 1	-2.53041	1418486_at
9030611O19Rik	RIKEN cDNA 9030611O19 gene	-2.52078	1418879_at
Ptpn21	protein tyrosine phosphatase, non-receptor type 21	-2.52072	1419054_a_at
Upp1	uridine phosphorylase 1	-2.52037	1448562_at
Ccl27	chemokine (C-C motif) ligand 27	-2.51829	1419188_s_at
Pex11c	peroxisomal biogenesis factor 11c	-2.51375	1430856_at
Rnf217	ring finger protein 217	-2.5133	1440179_x_at
Fmnl2	formin-like 2	-2.51045	1428579_at
Nrk	Nik related kinase	-2.50911	1450079_at
Zbtb20	zinc finger and BTB domain containing 20	-2.50807	1422064_a_at
Prkg1	protein kinase, cGMP-dependent, type I	-2.50129	1449876_at
Fbxo17	F-box protein 17	-2.50098	1421746_a_at
5930427L02Rik	RIKEN cDNA 5930427L02 gene	-2.49656	1445938_at
9130023H24Rik	RIKEN cDNA 9130023H24 gene	-2.48411	1456331_at
OTTMUSG00000010173	predicted gene, OTTMUSG00000010173	-2.48364	1439065_x_at
Jam2	junction adhesion molecule 2	-2.48256	1436568_at
Car3	carbonic anhydrase 3	-2.48228	1449434_at
Insl3	insulin-like 3	-2.47792	1423021_s_at
Cand2	cullin-associated and neddylation-dissociated 2 (putative)	-2.47408	1429622_at
Mctp2	multiple C2 domains, transmembrane 2	-2.47344	1457707_at
Gcet2	germinal center expressed transcript 2	-2.47034	1420544_at
Rreb1	ras responsive element binding protein 1	-2.4659	1438216_at
Gucy1a3	guanylate cyclase 1, soluble, alpha 3	-2.45947	1434141_at
Clec1a	C-type lectin domain family 1, member a	-2.45901	1456318_at
LOC100047360	similar to sex comb on midleg-like 2 (Drosophila)	-2.45636	1456984_at
Hoxa5	homeo box A5	-2.45091	1448926_at
Ltb	lymphotoxin B	-2.44979	1419135_at
Rassf6	Ras association (RalGDS/AF-6) domain family member 6	-2.44659	1429262_at
Samd9l	sterile alpha motif domain containing 9-like	-2.44254	1455581_x_at
Sla2	Src-like-adaptor 2	-2.43986	1437504_at
Nrxn1	neurexin I	-2.42759	1454691_at
Samd9l	sterile alpha motif domain containing 9-like	-2.42262	1436172_at
100042016	predicted gene, 100042016	-2.42235	1441231_at
Trim68	tripartite motif-containing 68	-2.42078	1455124_at
Casp12	caspase 12	-2.40735	1449297_at
Sfi1	Sfi1 homolog, spindle assembly associated (yeast)	-2.40691	1435353_a_at
Tox	thymocyte selection-associated high mobility group box	-2.40289	1442039_at
Angpt1	angiopoietin 1	-2.40028	1439066_at
Csgalnact1	chondroitin sulfate N-acetylgalactosaminyltransferase 1	-2.3978	1452366_at
C230098O21Rik	RIKEN cDNA C230098O21 gene	-2.39531	1433988_s_at
Ttpa	tocopherol (alpha) transfer protein	-2.39142	1427284_a_at
Stk11	serine/threonine kinase 11	-2.38594	1438370_x_at
Mcm5	minichromosome maintenance deficient 5, cell division cycle 46 (S. cerevisiae)	-2.3857	1459658_at
Srr	serine racemase	-2.38261	1458393_at
Sema4f	sema domain, immunoglobulin domain (Ig), TM domain, and short cytoplasmic domain	-2.3819	1439768_x_at
2010001J22Rik	RIKEN cDNA 2010001J22 gene	-2.37694	1443670_at
Inha	inhibin alpha	-2.37449	1422728_at
Rbpms2	RNA binding protein with multiple splicing 2	-2.37092	1424008_a_at
LOC100042332	hypothetical protein LOC100042332	-2.36615	1438972_x_at
Gpr171	G protein-coupled receptor 171	-2.35999	1438439_at
Slc35e4	solute carrier family 35, member E4	-2.35943	1436693_x_at
Cldn12	claudin 12	-2.35692	1433781_a_at
Hs6st2	heparan sulfate 6-O-sulfotransferase 2	-2.35631	1450047_at
B3gnt5	UDP-GlcNAc:betaGal beta-1,3-N-acetylglucosaminyltransferase 5	-2.35513	1420994_at
Sgce	sarcoglycan, epsilon	-2.35487	1420688_a_at
Prkag2	protein kinase, AMP-activated, gamma 2 non-catalytic subunit	-2.35415	1451140_s_at
Niban	niban protein	-2.35235	1454942_at
9430081I23Rik	RIKEN cDNA 9430081I23 gene	-2.35004	1446088_at
Coro2b	coronin, actin binding protein, 2B	-2.34877	1434326_x_at
Rps24	ribosomal protein S24	-2.34058	1455195_at
Gnat2	guanine nucleotide binding protein, alpha transducing 2	-2.33649	1422907_at
Ak3l1	adenylate kinase 3-like 1	-2.33417	1450387_s_at
Scyl1	SCY1-like 1 (S. cerevisiae)	-2.33343	1438312_s_at
Trib3	tribbles homolog 3 (Drosophila)	-2.33269	1456225_x_at
Mapk12	mitogen-activated protein kinase 12	-2.33107	1449283_a_at
Lpp	LIM domain containing preferred translocation partner in lipoma	-2.32823	1440167_s_at
Actn1	actinin, alpha 1	-2.32746	1428585_at
Fstl1	follistatin-like 1	-2.32462	1416221_at
Bmp1	bone morphogenetic protein 1	-2.3218	1426238_at
Khdrbs3	KH domain containing, RNA binding, signal transduction associated 3	-2.31799	1453317_a_at
100039909	predicted gene, 100039909	-2.3155	1447939_a_at
Fstl1	follistatin-like 1	-2.3124	1448259_at
Hlf	hepatic leukemia factor	-2.31207	1434736_at
Rcbtb2	regulator of chromosome condensation (RCC1) and BTB (POZ) domain containing protein 2	-2.30972	1416390_at
Msi2	Musashi homolog 2 (Drosophila)	-2.3039	1441185_at
Fgd1	FYVE, RhoGEF and PH domain containing 1	-2.29516	1437369_at
Sh3yl1	Sh3 domain YSC-like 1	-2.28899	1449579_at
Tcta	T-cell leukemia translocation altered gene	-2.28851	1420125_at
Als2	amyotrophic lateral sclerosis 2 (juvenile) homolog (human)	-2.28774	1417784_at
Clcf1	cardiotrophin-like cytokine factor 1	-2.28697	1437270_a_at
Abhd6	abhydrolase domain containing 6	-2.28428	1419103_a_at
Ndrg1	N-myc downstream regulated gene 1	-2.2842	1456174_x_at
Sox4	SRY-box containing gene 4	-2.27908	1455867_at
Mapk1ip1l	mitogen-activated protein kinase 1 interacting protein 1-like	-2.27338	1429784_at
Ccl27	chemokine (C-C motif) ligand 27	-2.27226	1430375_a_at
Gprasp1	G protein-coupled receptor associated sorting protein 1	-2.26305	1424455_at
Pear1	platelet endothelial aggregation receptor 1	-2.26203	1425268_a_at
Ptpn3	protein tyrosine phosphatase, non-receptor type 3	-2.26014	1455450_at
Slc30a4	solute carrier family 30 (zinc transporter), member 4	-2.25955	1418843_at
Gpr64	G protein-coupled receptor 64	-2.25858	1439795_at
Tro	trophinin	-2.25817	1426016_a_at
Sox6	SRY-box containing gene 6	-2.2557	1427677_a_at
Pkd2	polycystic kidney disease 2	-2.25418	1441870_s_at
Rcn2	reticulocalbin 2	-2.25397	1444248_at
Vldlr	very low density lipoprotein receptor	-2.25236	1438258_at
Pvrl3	poliovirus receptor-related 3	-2.24725	1448673_at
A730056I06Rik	RIKEN cDNA A730056I06 gene	-2.24663	1439894_at
Ift122	intraflagellar transport 122 homolog (Chlamydomonas)	-2.24482	1441259_s_at
Arrdc4	arrestin domain containing 4	-2.24477	1426818_at
Zfp608	zinc finger protein 608	-2.24284	1439485_at
2900005J15Rik	RIKEN cDNA 2900005J15 gene	-2.24274	1453655_at
Slc2a1	solute carrier family 2 (facilitated glucose transporter), member 1	-2.24186	1426599_a_at
Mpdz	multiple PDZ domain protein	-2.24057	1418664_at
Rab34	RAB34, member of RAS oncogene family	-2.23895	1416590_a_at
Il17re	interleukin 17 receptor E	-2.23892	1439357_at
Ppm1h	protein phosphatase 1H (PP2C domain containing)	-2.23867	1455737_at
Znrf3	zinc and ring finger 3	-2.23183	1435608_at
Stxbp4	syntaxin binding protein 4	-2.22951	1451063_at
Casp4	caspase 4, apoptosis-related cysteine peptidase	-2.22804	1449591_at
Bace1	beta-site APP cleaving enzyme 1	-2.2278	1455826_a_at
Bcnp1	BCNP1 homolog	-2.22478	1457728_at
Prpf6	PRP6 pre-mRNA splicing factor 6 homolog (yeast)	-2.22166	1454789_x_at
Palld	palladin, cytoskeletal associated protein	-2.22015	1440635_at
Chic1	cysteine-rich hydrophobic domain 1	-2.21831	1439300_at
Pisd	phosphatidylserine decarboxylase	-2.21646	1435426_s_at
Mansc1	MANSC domain containing 1	-2.21198	1423284_at
Zbtb4	zinc finger and BTB domain containing 4	-2.21189	1457293_at
Cdkn1c	cyclin-dependent kinase inhibitor 1C (P57)	-2.20872	1417649_at
2810055G20Rik	RIKEN cDNA 2810055G20 gene	-2.2076	1445363_at
2010001J22Rik	RIKEN cDNA 2010001J22 gene	-2.20538	1443671_x_at
Gcet2	germinal center expressed transcript 2	-2.20213	1442582_at
Rhbdf1	rhomboid family 1 (Drosophila)	-2.20134	1424138_at
ENSMUSG00000072769	predicted gene, ENSMUSG00000072769	-2.20022	1436265_at
Prkd1	protein kinase D1	-2.1978	1447623_s_at
Dnmbp	dynamin binding protein	-2.19688	1427033_at
Ggt5	gamma-glutamyltransferase 5	-2.19684	1455747_at
Soat1	sterol O-acyltransferase 1	-2.19655	1417695_a_at
Gabbr1	gamma-aminobutyric acid (GABA-B) receptor, 1	-2.18984	1455021_at
Kif17	kinesin family member 17	-2.18273	1419827_s_at
Apob	apolipoprotein B	-2.18253	1455593_at
Obsl1	obscurin-like 1	-2.17984	1427535_s_at
Ptpdc1	protein tyrosine phosphatase domain containing 1	-2.17915	1437613_s_at
D2Bwg1335e	DNA segment, Chr 2, Brigham & Women@#$%&s Genetics 1335 expressed	-2.17669	1436917_s_at
Letm2	leucine zipper-EF-hand containing transmembrane protein 2	-2.17569	1435499_at
Tbc1d10c	TBC1 domain family, member 10c	-2.17514	1454850_at
Ttll11	tubulin tyrosine ligase-like family, member 11	-2.17354	1430064_at
Nope	neighbor of Punc E11	-2.16847	1416473_a_at
Ddb2	damage specific DNA binding protein 2	-2.16466	1436680_s_at
Psip1	PC4 and SFRS1 interacting protein 1	-2.16184	1442148_at
Sfi1	Sfi1 homolog, spindle assembly associated (yeast)	-2.16163	1428778_at
Marveld1	MARVEL (membrane-associating) domain containing 1	-2.16071	1436830_at
Sbk1	SH3-binding kinase 1	-2.1575	1451190_a_at
Six6os1	Six6 opposite strand transcript 1	-2.15173	1431896_at
Slco4a1	solute carrier organic anion transporter family, member 4a1	-2.15143	1438160_x_at
0610040B09Rik	RIKEN cDNA 0610040B09 gene	-2.14898	1447886_at
AW493563	expressed sequence AW493563	-2.14825	1441751_at
Rgs7bp	regulator of G-protein signalling 7 binding protein	-2.14126	1436876_at
Marcks	myristoylated alanine rich protein kinase C substrate	-2.14084	1415972_at
Mcart6	mitochondrial carrier triple repeat 6	-2.1399	1459914_at
Myadm	myeloid-associated differentiation marker	-2.13983	1439389_s_at
Zfhx3	zinc finger homeobox 3	-2.13841	1420649_at
Ttc28	tetratricopeptide repeat domain 28	-2.13811	1435456_at
Trpc6	transient receptor potential cation channel, subfamily C, member 6	-2.13762	1449431_at
Sbf2	SET binding factor 2	-2.13646	1443762_s_at
Lsp1	lymphocyte specific 1	-2.13641	1417756_a_at
Wbscr27	Williams Beuren syndrome chromosome region 27 (human)	-2.13454	1418359_at
Pafah2	platelet-activating factor acetylhydrolase 2	-2.13425	1448489_at
Serpinb1a	serine (or cysteine) peptidase inhibitor, clade B, member 1a	-2.13423	1448301_s_at
Hlf	hepatic leukemia factor	-2.13301	1434735_at
Apob48r	apolipoprotein B48 receptor	-2.13246	1420382_at
Nkx2-3	NK2 transcription factor related, locus 3 (Drosophila)	-2.13075	1425827_at
Ccdc62	coiled-coil domain containing 62	-2.12916	1458644_at
2610110G12Rik	RIKEN cDNA 2610110G12 gene	-2.12247	1429006_s_at
Kif17	kinesin family member 17	-2.12142	1436100_at
Meg3	maternally expressed 3	-2.1214	1439380_x_at
Marcks	myristoylated alanine rich protein kinase C substrate	-2.12087	1456028_x_at
Afp	alpha fetoprotein	-2.1193	1416645_a_at
Adam11	a disintegrin and metallopeptidase domain 11	-2.11883	1455270_at
1110003E01Rik	RIKEN cDNA 1110003E01 gene	-2.1156	1435464_at
Nxnl2	nucleoredoxin-like 2	-2.11312	1429133_at
Morn4	MORN repeat containing 4	-2.11307	1434943_at
Vldlr	very low density lipoprotein receptor	-2.11223	1417900_a_at
Supt7l	suppressor of Ty 7 (S. cerevisiae)-like	-2.11169	1433374_at
Nudt13	nudix (nucleoside diphosphate linked moiety X)-type motif 13	-2.11034	1422126_a_at
Pde4dip	phosphodiesterase 4D interacting protein (myomegalin)	-2.1057	1456413_at
1110028C15Rik	RIKEN cDNA 1110028C15 gene	-2.10524	1436214_at
Zfp608	zinc finger protein 608	-2.1038	1442050_at
Mllt11	myeloid/lymphoid or mixed-lineage leukemia (trithorax homolog, Drosophila); translocated to, 11	-2.10351	1416313_at
Adam22	a disintegrin and metallopeptidase domain 22	-2.10209	1435293_at
Bex4	brain expressed gene 4	-2.10064	1428209_at
Gzmb	granzyme B	-2.10047	1419060_at
Nisch	nischarin	-2.10043	1433757_a_at
Sox4	SRY-box containing gene 4	-2.09793	1419156_at
Phf17	PHD finger protein 17	-2.09772	1426753_at
Magi3	membrane associated guanylate kinase, WW and PDZ domain containing 3	-2.09205	1435461_at
Csgalnact1	chondroitin sulfate N-acetylgalactosaminyltransferase 1	-2.0877	1452365_at
Clec1a	C-type lectin domain family 1, member a	-2.0873	1460039_at
Smo	smoothened homolog (Drosophila)	-2.08574	1427049_s_at
Tubgcp5	tubulin, gamma complex associated protein 5	-2.08394	1457282_x_at
Large	like-glycosyltransferase	-2.08258	1417435_at
Actr1a	ARP1 actin-related protein 1 homolog A, centractin alpha (yeast)	-2.08121	1457970_at
Pts	6-pyruvoyl-tetrahydropterin synthase	-2.08027	1450660_at
Pogk	pogo transposable element with KRAB domain	-2.0769	1447864_s_at
1700025G04Rik	RIKEN cDNA 1700025G04 gene	-2.0765	1436431_at
1500031L02Rik	RIKEN cDNA 1500031L02 gene	-2.07636	1417840_at
Gkap1	G kinase anchoring protein 1	-2.07632	1417594_at
Meis1	Meis homeobox 1	-2.0743	1443260_at
Lonrf3	LON peptidase N-terminal domain and ring finger 3	-2.0741	1436200_at
Fli1	Friend leukemia integration 1	-2.07365	1433512_at
Zfp618	zinc fingerprotein 618	-2.07298	1436190_at
Acvr2a	activin receptor IIA	-2.07293	1437382_at
Rap1gap	Rap1 GTPase-activating protein	-2.0716	1428443_a_at
1300007F04Rik	RIKEN cDNA 1300007F04 gene	-2.07123	1453474_at
Pard3b	par-3 partitioning defective 3 homolog B (C. elegans)	-2.07064	1427169_at
Zfp827	zinc finger protein 827	-2.06946	1442562_at
4930528F23Rik	RIKEN cDNA 4930528F23 gene	-2.06904	1431648_at
Cacna1a	calcium channel, voltage-dependent, P/Q type, alpha 1A subunit	-2.06788	1459996_at
Sfxn3	sideroflexin 3	-2.0674	1417893_at
Zfp521	zinc finger protein 521	-2.0669	1451332_at
Synpo2	synaptopodin 2	-2.06676	1452879_at
Msi2	Musashi homolog 2 (Drosophila)	-2.06526	1435521_at
Tbxas1	thromboxane A synthase 1, platelet	-2.06452	1416827_at
Mylc2pl	myosin light chain 2, precursor lymphocyte-specific	-2.06363	1420805_at
BC066028	cDNA sequence BC066028	-2.06177	1458163_at
6720454L07Rik	RIKEN cDNA 6720454L07 gene	-2.05844	1454557_at
Dnalc1	dynein, axonemal, light chain 1	-2.05684	1455630_at
4931440B09Rik	RIKEN cDNA 4931440B09 gene	-2.05609	1446287_at
AW555464	expressed sequence AW555464	-2.05603	1433712_at
Hoxa5	homeo box A5	-2.05581	1443803_x_at
Gpx7	glutathione peroxidase 7	-2.05532	1417836_at
Clip3	CAP-GLY domain containing linker protein 3	-2.05378	1435256_at
Nisch	nischarin	-2.05203	1433758_at
OTTMUSG00000011070	predicted gene, OTTMUSG00000011070	-2.05015	1438237_at
Rilpl1	Rab interacting lysosomal protein-like 1	-2.04775	1450449_a_at
Mapk1ip1	mitogen-activated protein kinase 1 interacting protein 1	-2.04485	1452798_s_at
Lpp	LIM domain containing preferred translocation partner in lipoma	-2.04106	1425673_at
Gm447	gene model 447, (NCBI)	-2.03884	1443941_at
5830456J23Rik	RIKEN cDNA 5830456J23 gene	-2.0377	1433169_at
Agpat2	1-acylglycerol-3-phosphate O-acyltransferase 2 (lysophosphatidic acid acyltransferase, beta)	-2.03686	1428821_at
Ttc21b	tetratricopeptide repeat domain 21B	-2.03681	1455322_at
D3Ertd300e	DNA segment, Chr 3, ERATO Doi 300, expressed	-2.03658	1420115_at
Gimap5	GTPase, IMAP family member 5	-2.03552	1444181_at
Crispld1	cysteine-rich secretory protein LCCL domain containing 1	-2.03267	1423353_at
Snx24	sorting nexing 24	-2.03266	1428822_a_at
Rsad2	radical S-adenosyl methionine domain containing 2	-2.03265	1421009_at
Cttnbp2nl	CTTNBP2 N-terminal like	-2.03166	1435542_s_at
Ccdc112	coiled-coil domain containing 112	-2.03152	1429167_at
Ppp1r9a	protein phosphatase 1, regulatory (inhibitor) subunit 9A	-2.03071	1440285_at
BC011426	cDNA sequence BC011426	-2.02717	1425240_at
Elmo3	engulfment and cell motility 3, ced-12 homolog (C. elegans)	-2.02624	1434489_at
Nupr1	nuclear protein 1	-2.0248	1419666_x_at
Galnt12	UDP-N-acetyl-alpha-D-galactosamine:polypeptide N-acetylgalactosaminyltransferase 12	-2.02458	1437760_at
Dmxl2	Dmx-like 2	-2.02246	1428749_at
Btf3l4	basic transcription factor 3-like 4	-2.01809	1424074_at
Csad	cysteine sulfinic acid decarboxylase	-2.0159	1427981_a_at
Sash1	SAM and SH3 domain containing 1	-2.01309	1448005_at
Lyrm5	LYR motif containing 5	-2.01024	1459793_s_at
Rhoq	ras homolog gene family, member Q	-2.00731	1427918_a_at
Syt11	synaptotagmin XI	-2.00691	1456464_x_at
Dennd1c	DENN/MADD domain containing 1C	-2.00509	1437121_at
Vdr	vitamin D receptor	-1.99951	1418175_at
Pctk3	PCTAIRE-motif protein kinase 3	-1.9989	1449151_at
Ggt5	gamma-glutamyltransferase 5	-1.9954	1418216_at
Bach2	BTB and CNC homology 2	-1.99506	1436515_at
Ptplad2	protein tyrosine phosphatase-like A domain containing 2	-1.99499	1450967_at
9530019H20Rik	RIKEN cDNA 9530019H20 gene	-1.99392	1458113_at
AI503316	expressed sequence AI503316	-1.9939	1434391_at
Zfp467	zinc finger protein 467	-1.99311	1441727_s_at
5730414N17Rik	RIKEN cDNA 5730414N17 gene	-1.99267	1429899_at
Neo1	neogenin	-1.99231	1440789_at
AI451458	expressed sequence AI451458	-1.99024	1442122_at
Zan	zonadhesin	-1.99013	1421614_at
Ndrg4	N-myc downstream regulated gene 4	-1.99	1426615_s_at
Tm2d2	TM2 domain containing 2	-1.98875	1438181_x_at
Itgae	integrin alpha E, epithelial-associated	-1.98864	1447541_s_at
Atp5a1	ATP synthase, H+ transporting, mitochondrial F1 complex, alpha subunit, isoform 1	-1.98862	1420037_at
Fam167a	family with sequence similarity 167, member A	-1.98848	1455872_at
Nhedc2	Na+/H+ exchanger domain containing 2	-1.98647	1439995_at
Npdc1	neural proliferation, differentiation and control gene 1	-1.98337	1415919_at
A930041I02Rik	RIKEN cDNA A930041I02 gene	-1.9808	1440846_at
A130090K04Rik	RIKEN cDNA A130090K04 gene	-1.97828	1439808_at
Zfp286	zinc finger protein 286	-1.97731	1442247_at
Klf12	Kruppel-like factor 12	-1.977	1439847_s_at
9630026M06Rik	RIKEN cDNA 9630026M06 gene	-1.97657	1442427_at
Mamdc2	MAM domain containing 2	-1.97589	1453152_at
Slc16a9	solute carrier family 16 (monocarboxylic acid transporters), member 9	-1.97215	1429727_at
Mycn	v-myc myelocytomatosis viral related oncogene, neuroblastoma derived (avian)	-1.97118	1417155_at
Psrc1	proline/serine-rich coiled-coil 1	-1.96935	1451698_at
Ctla2b	cytotoxic T lymphocyte-associated protein 2 beta	-1.96809	1452352_at
Zfp691	zinc finger protein 691	-1.96721	1456912_at
Crebzf	CREB/ATF bZIP transcription factor	-1.9664	1452856_at
Sestd1	SEC14 and spectrin domains 1	-1.96536	1455549_at
Phldb2	pleckstrin homology-like domain, family B, member 2	-1.96454	1454862_at
Mllt6	myeloid/lymphoid or mixed-lineage leukemia (trithorax homolog, Drosophila); translocated to, 6	-1.96452	1433811_at
OTTMUSG00000023003	predicted gene, OTTMUSG00000023003	-1.96114	1445074_at
Sema7a	sema domain, immunoglobulin domain (Ig), and GPI membrane anchor, (semaphorin) 7A	-1.96097	1459903_at
Zfp566	zinc finger protein 566	-1.96048	1425007_at
6720401G13Rik	RIKEN cDNA 6720401G13 gene	-1.96015	1435744_at
Agbl5	ATP/GTP binding protein-like 5	-1.95915	1439465_x_at
Parp3	poly (ADP-ribose) polymerase family, member 3	-1.95673	1451969_s_at
Marveld1	MARVEL (membrane-associating) domain containing 1	-1.95628	1439381_x_at
Glis2	GLIS family zinc finger 2	-1.95596	1416598_at
Scp2	sterol carrier protein 2, liver	-1.95475	1419975_at
Ptprf	protein tyrosine phosphatase, receptor type, F	-1.95365	1420842_at
4933439C20Rik	RIKEN cDNA 4933439C20 gene	-1.95156	1436944_x_at
D4Ertd298e	DNA segment, Chr 4, ERATO Doi 298, expressed	-1.94824	1445940_at
Tspyl4	TSPY-like 4	-1.94789	1424029_at
Xbp1	X-box binding protein 1	-1.94756	1420012_at
Bbs4	Bardet-Biedl syndrome 4 (human)	-1.94335	1420107_at
Solh	small optic lobes homolog (Drosophila)	-1.9427	1427785_x_at
Anxa4	annexin A4	-1.94192	1421223_a_at
Tcf19	transcription factor 19	-1.93701	1423809_at
Rnf185	ring finger protein 185	-1.9366	1459877_x_at
Stard6	StAR-related lipid transfer (START) domain containing 6	-1.93622	1426317_at
Gsta4	glutathione S-transferase, alpha 4	-1.93573	1416368_at
Traf1	Tnf receptor-associated factor 1	-1.934	1445452_at
Lats1	large tumor suppressor	-1.93365	1427679_at
Kctd15	potassium channel tetramerisation domain containing 15	-1.93207	1435339_at
Dnm2	dynamin 2	-1.9311	1425135_a_at
Tspan4	tetraspanin 4	-1.92988	1448276_at
Tbc1d14	TBC1 domain family, member 14	-1.92924	1449772_at
4933439C20Rik	RIKEN cDNA 4933439C20 gene	-1.92852	1453144_at
Zfp354c	zinc finger protein 354C	-1.92841	1439044_at
Armcx2	armadillo repeat containing, X-linked 2	-1.92699	1456739_x_at
Nelf	nasal embryonic LHRH factor	-1.92482	1436959_x_at
Mbtd1	mbt domain containing 1	-1.9232	1443862_at
1600016N20Rik	RIKEN cDNA 1600016N20 gene	-1.9229	1430017_at
Pdzk1ip1	PDZK1 interacting protein 1	-1.9227	1417689_a_at
Il6	interleukin 6	-1.92173	1450297_at
Itih5	inter-alpha (globulin) inhibitor H5	-1.92159	1441946_at
5830455E04Rik	RIKEN cDNA 5830455E04 gene	-1.92148	1439087_a_at
Eid2	EP300 interacting inhibitor of differentiation 2	-1.92041	1454931_at
Smpdl3b	sphingomyelin phosphodiesterase, acid-like 3B	-1.9192	1417300_at
Klf12	Kruppel-like factor 12	-1.91838	1439846_at
Abcb1a	ATP-binding cassette, sub-family B (MDR/TAP), member 1A	-1.91804	1419759_at
Kbtbd11	kelch repeat and BTB (POZ) domain containing 11	-1.91632	1435465_at
BC023744	cDNA sequence BC023744	-1.91608	1436591_at
4732460I02Rik	RIKEN cDNA 4732460I02 gene	-1.91372	1440933_at
Smarcd2	SWI/SNF related, matrix associated, actin dependent regulator of chromatin, subfamily d, member 2	-1.91332	1426192_at
Gstt1	glutathione S-transferase, theta 1	-1.91266	1418186_at
Sla2	Src-like-adaptor 2	-1.91064	1451492_at
2810410L24Rik	RIKEN cDNA 2810410L24 gene	-1.91005	1429510_at
Ttc23	tetratricopeptide repeat domain 23	-1.90957	1448902_at
Bnip2	BCL2/adenovirus E1B interacting protein 2	-1.90788	1441989_at
Aph1b	anterior pharynx defective 1b homolog (C. elegans)	-1.90443	1435793_at
5033403F01Rik	RIKEN cDNA 5033403F01 gene	-1.90236	1430766_at
Sox6	SRY-box containing gene 6	-1.89948	1426018_a_at
Med12l	mediator of RNA polymerase II transcription, subunit 12 homolog (yeast)-like	-1.89908	1452864_at
Ppt1	palmitoyl-protein thioesterase 1	-1.89778	1422467_at
Otud5	OTU domain containing 5	-1.89767	1436262_x_at
Hdac11	histone deacetylase 11	-1.89648	1451229_at
Klf4	Kruppel-like factor 4 (gut)	-1.89629	1417395_at
LOC100039489	similar to Hmgn2 protein	-1.89493	1433507_a_at
C77080	expressed sequence C77080	-1.89481	1433775_at
Rabep2	rabaptin, RAB GTPase binding effector protein 2	-1.89398	1440795_x_at
Phlda2	pleckstrin homology-like domain, family A, member 2	-1.89324	1417837_at
4933439C20Rik	RIKEN cDNA 4933439C20 gene	-1.89154	1429452_x_at
Cxxc5	CXXC finger 5	-1.89152	1448960_at
Phf7	PHD finger protein 7	-1.89147	1420260_at
Pabpc4l	poly(A) binding protein, cytoplasmic 4-like	-1.89083	1431353_at
Armcx2	armadillo repeat containing, X-linked 2	-1.89022	1437849_x_at
Hip1r	huntingtin interacting protein 1 related	-1.88999	1425553_s_at
A430102J17Rik	RIKEN cDNA A430102J17 gene	-1.8886	1438895_at
Tmem53	transmembrane protein 53	-1.88854	1451479_a_at
Gas2l3	growth arrest-specific 2 like 3	-1.88841	1453416_at
Sfi1	Sfi1 homolog, spindle assembly associated (yeast)	-1.88758	1447901_x_at
Ifitm1	interferon induced transmembrane protein 1	-1.88707	1424254_at
Ptprs	protein tyrosine phosphatase, receptor type, S	-1.8857	1426794_at
Osbpl1a	oxysterol binding protein-like 1A	-1.88363	1460192_at
Plekha7	pleckstrin homology domain containing, family A member 7	-1.8829	1455343_at
Clcf1	cardiotrophin-like cytokine factor 1	-1.88222	1437271_at
Nisch	nischarin	-1.88142	1430151_at
Znf512b	zinc finger protein 512B	-1.88141	1441245_a_at
Solh	small optic lobes homolog (Drosophila)	-1.88102	1434416_a_at
Palld	palladin, cytoskeletal associated protein	-1.87855	1427228_at
4933439C20Rik	RIKEN cDNA 4933439C20 gene	-1.87723	1434975_x_at
Ifi203	interferon activated gene 203	-1.87678	1448775_at
Ccdc102a	coiled-coil domain containing 102A	-1.87571	1438316_a_at
2310001H17Rik	RIKEN cDNA 2310001H17 gene	-1.87388	1446096_at
4933406C10Rik	RIKEN cDNA 4933406C10 gene	-1.87271	1430246_at
1700029I15Rik	RIKEN cDNA 1700029I15 gene	-1.87103	1438979_s_at
Tnfrsf13c	tumor necrosis factor receptor superfamily, member 13c	-1.86959	1419307_at
Smpdl3a	sphingomyelin phosphodiesterase, acid-like 3A	-1.86883	1416635_at
Zfp397	zinc finger protein 397	-1.86866	1435664_at
Amn1	antagonist of mitotic exit network 1 homolog (S. cerevisiae)	-1.86838	1441141_at
Cd27	CD27 antigen	-1.86734	1452389_at
Acot1	acyl-CoA thioesterase 1	-1.8673	1449065_at
Ift81	intraflagellar transport 81 homolog (Chlamydomonas)	-1.86712	1419286_s_at
Cyp4b1	cytochrome P450, family 4, subfamily b, polypeptide 1	-1.86711	1416194_at
Zfp51	zinc finger protein 51	-1.86704	1424706_at
Ttc14	tetratricopeptide repeat domain 14	-1.866	1456430_at
Tslp	thymic stromal lymphopoietin	-1.86493	1450004_at
Trp53i13	transformation related protein 53 inducible protein 13	-1.86345	1455315_at
D2hgdh	D-2-hydroxyglutarate dehydrogenase	-1.86298	1437840_s_at
Obscn	obscurin, cytoskeletal calmodulin and titin-interacting RhoGEF	-1.86192	1443632_at
Tfpi	tissue factor pathway inhibitor	-1.86031	1451791_at
Inhba	inhibin beta-A	-1.85906	1422053_at
C78516	expressed sequence C78516	-1.85883	1459469_at
Zdhhc23	zinc finger, DHHC domain containing 23	-1.85811	1441069_at
Abcb1b	ATP-binding cassette, sub-family B (MDR/TAP), member 1B	-1.85811	1418872_at
ENSMUSG00000073624	predicted gene, ENSMUSG00000073624	-1.85761	1455316_x_at
Wdr40b	WD repeat domain 40B	-1.85744	1454869_at
Psip1	PC4 and SFRS1 interacting protein 1	-1.85589	1457731_at
Tmem71	transmembrane protein 71	-1.85536	1436212_at
Glt8d2	glycosyltransferase 8 domain containing 2	-1.85477	1429403_x_at
Brwd2	bromodomain and WD repeat domain containing 2	-1.85414	1452820_at
Rab23	RAB23, member RAS oncogene family	-1.85248	1454876_at
Ltbp3	latent transforming growth factor beta binding protein 3	-1.85218	1437833_at
Hic2	hypermethylated in cancer 2	-1.85079	1454944_at
Dmd	dystrophin, muscular dystrophy	-1.85057	1448665_at
LOC545261	hypothetical protein LOC545261	-1.84879	1459888_at
Epb4.1l4b	erythrocyte protein band 4.1-like 4b	-1.84622	1418294_at
Fah	fumarylacetoacetate hydrolase	-1.84604	1417220_at
4632404H12Rik	RIKEN cDNA 4632404H12 gene	-1.84573	1431820_at
A330075M08Rik	RIKEN cDNA A330075M08 gene	-1.84377	1446797_at
Tymp	thymidine phosphorylase	-1.84354	1429546_at
Pkd2	polycystic kidney disease 2	-1.84314	1417753_at
Lama3	laminin, alpha 3	-1.84305	1427512_a_at
Pcgf5	polycomb group ring finger 5	-1.84207	1453636_at
Mctp1	multiple C2 domains, transmembrane 1	-1.84031	1430439_at
Zfp260	zinc finger protein 260	-1.84018	1436495_s_at
Casp12	caspase 12	-1.83943	1418981_at
Rgs3	regulator of G-protein signaling 3	-1.83909	1449516_a_at
Dennd2d	DENN/MADD domain containing 2D	-1.83769	1438712_at
0610009L18Rik	RIKEN cDNA 0610009L18 gene	-1.83748	1453141_at
8430408J09Rik	RIKEN cDNA 8430408J09 gene	-1.83636	1430196_at
Ccdc69	coiled-coil domain containing 69	-1.83622	1419986_at
4933439C20Rik	RIKEN cDNA 4933439C20 gene	-1.83497	1439070_x_at
Rapgef5	Rap guanine nucleotide exchange factor (GEF) 5	-1.83464	1455137_at
Hivep3	human immunodeficiency virus type I enhancer binding protein 3	-1.83423	1439660_at
Tardbp	TAR DNA binding protein	-1.83299	1436318_at
Armcx1	armadillo repeat containing, X-linked 1	-1.83031	1425914_a_at
Ahi1	Abelson helper integration site 1	-1.82957	1455177_at
4930578N16Rik	RIKEN cDNA 4930578N16 gene	-1.82949	1431204_at
Ifi205	interferon activated gene 205	-1.82681	1426906_at
Fahd2a	fumarylacetoacetate hydrolase domain containing 2A	-1.82479	1441901_x_at
D130020L05Rik	RIKEN cDNA D130020L05 gene	-1.82361	1457054_a_at
Npl	N-acetylneuraminate pyruvate lyase	-1.82225	1424265_at
Pcgf6	polycomb group ring finger 6	-1.82196	1432108_at
A930024E05Rik	RIKEN cDNA A930024E05 gene	-1.8219	1440206_at
Cap1	CAP, adenylate cyclase-associated protein 1 (yeast)	-1.82152	1417461_at
Epb4.1l4b	erythrocyte protein band 4.1-like 4b	-1.82133	1455628_at
Ica1	islet cell autoantigen 1	-1.82038	1417901_a_at
2210010N04Rik	RIKEN cDNA 2210010N04 gene	-1.81968	1423989_at
Shroom3	shroom family member 3	-1.81921	1422629_s_at
Man2a2	mannosidase 2, alpha 2	-1.81817	1435203_at
Rsad2	radical S-adenosyl methionine domain containing 2	-1.81751	1436058_at
Marveld2	MARVEL (membrane-associating) domain containing 2	-1.81553	1426914_at
Tcf4	transcription factor 4	-1.81513	1416723_at
Ttc12	tetratricopeptide repeat domain 12	-1.81238	1435211_at
Laptm5	lysosomal-associated protein transmembrane 5	-1.81116	1426025_s_at
Apcdd1	adenomatosis polyposis coli down-regulated 1	-1.80923	1454822_x_at
Hddc3	HD domain containing 3	-1.80918	1428692_at
Usp14	ubiquitin specific peptidase 14	-1.80709	1420043_s_at
3222402P14Rik	RIKEN cDNA 3222402P14 gene	-1.80618	1455091_at
Zfp579	zinc finger protein 579	-1.80615	1428564_at
AI503316	expressed sequence AI503316	-1.8056	1434390_at
Ptcd1	pentatricopeptide repeat domain 1	-1.80517	1416391_at
Ppargc1a	peroxisome proliferative activated receptor, gamma, coactivator 1 alpha	-1.80505	1456395_at
Nr2c1	nuclear receptor subfamily 2, group C, member 1	-1.80011	1458338_x_at
Klc3	kinesin light chain 3	-1.79857	1425558_at
Usp7	ubiquitin specific peptidase 7	-1.79838	1419921_s_at
C030044B11Rik	RIKEN cDNA C030044B11 gene	-1.79725	1429264_at
Mycbp2	MYC binding protein 2	-1.79661	1434274_at
Cobll1	Cobl-like 1	-1.7966	1458097_at
4930456A14Rik	RIKEN cDNA 4930456A14 gene	-1.79539	1432968_at
Csnk1e	casein kinase 1, epsilon	-1.79533	1417176_at
AI790298	expressed sequence AI790298	-1.79475	1427146_at
Brd8	bromodomain containing 8	-1.79436	1456351_at
Itsn1	intersectin 1 (SH3 domain protein 1A)	-1.79298	1435885_s_at
Marcks	myristoylated alanine rich protein kinase C substrate	-1.79263	1415971_at
Lxn	latexin	-1.79165	1416503_at
Kcnq5	potassium voltage-gated channel, subfamily Q, member 5	-1.79139	1457587_at
Esr1	estrogen receptor 1 (alpha)	-1.79051	1435663_at
AI646383	expressed sequence AI646383	-1.78796	1459922_at
Ahr	aryl-hydrocarbon receptor	-1.78741	1422631_at
6030445D17Rik	RIKEN cDNA 6030445D17 gene	-1.78676	1441512_at
Il2rg	interleukin 2 receptor, gamma chain	-1.78613	1416295_a_at
Pa2g4	proliferation-associated 2G4	-1.78557	1460265_at
Sfrs18	splicing factor, arginine/serine-rich 18	-1.78533	1437041_at
Clnk	cytokine-dependent hematopoietic cell linker	-1.78443	1420463_at
Bdh2	3-hydroxybutyrate dehydrogenase, type 2	-1.78443	1453011_at
Ccrl1	chemokine (C-C motif) receptor-like 1	-1.78099	1437668_at
Laptm4b	lysosomal-associated protein transmembrane 4B	-1.78026	1436915_x_at
Ccl27	chemokine (C-C motif) ligand 27	-1.77987	1434962_x_at
Cabc1	chaperone, ABC1 activity of bc1 complex like (S. pombe)	-1.77985	1417066_at
Pear1	platelet endothelial aggregation receptor 1	-1.77944	1425267_a_at
Ubqln2	ubiquilin 2	-1.77911	1450021_at
Krba1	KRAB-A domain containing 1	-1.7767	1449150_at
Pnkd	paroxysmal nonkinesiogenic dyskinesia	-1.77613	1418746_at
B430201A12Rik	RIKEN cDNA B430201A12 gene	-1.77575	1434828_at
Sigirr	single immunoglobulin and toll-interleukin 1 receptor (TIR) domain	-1.77363	1449163_at
Ccdc91	coiled-coil domain containing 91	-1.77332	1449083_at
Adam11	a disintegrin and metallopeptidase domain 11	-1.77331	1450248_at
Paqr5	progestin and adipoQ receptor family member V	-1.77316	1460459_at
Polr2b	polymerase (RNA) II (DNA directed) polypeptide B	-1.77287	1423584_at
Atp5s	ATP synthase, H+ transporting, mitochondrial F0 complex, subunit s	-1.77176	1417970_at
1700021P22Rik	RIKEN cDNA 1700021P22 gene	-1.77107	1437710_x_at
547127	predicted gene, 547127	-1.77085	1452848_at
Chad	chondroadherin	-1.77011	1420569_at
Zfp617	zinc finger protein 617	-1.76833	1443640_at
Rdh5	retinol dehydrogenase 5	-1.76832	1418808_at
Bcar3	breast cancer anti-estrogen resistance 3	-1.76801	1415936_at
Rgs19	regulator of G-protein signaling 19	-1.7679	1434940_x_at
Padi4	peptidyl arginine deiminase, type IV	-1.76761	1422760_at
40062	septin 6	-1.76661	1436819_at
D030011O10Rik	RIKEN cDNA D030011O10 gene	-1.76596	1455340_at
Scrn1	secernin 1	-1.76542	1439500_at
BC026585	cDNA sequence BC026585	-1.76268	1445857_at
Rgnef	Rho-guanine nucleotide exchange factor	-1.76247	1419457_at
Znrf1	zinc and ring finger 1	-1.76185	1424384_a_at
4930500O05Rik	RIKEN cDNA 4930500O05 gene	-1.76141	1439969_at
100043821	predicted gene, 100043821	-1.75963	1448715_x_at
Prdm5	PR domain containing 5	-1.75871	1432057_a_at
Esr1	estrogen receptor 1 (alpha)	-1.75865	1460591_at
Gch1	GTP cyclohydrolase 1	-1.75723	1429692_s_at
Dock6	dedicator of cytokinesis 6	-1.75673	1427240_at
H2-D1	histocompatibility 2, D region locus 1	-1.75641	1452548_x_at
Hnmt	histamine N-methyltransferase	-1.75565	1417702_a_at
Mcoln2	mucolipin 2	-1.7553	1431705_a_at
Zfp386	zinc finger protein 386 (Kruppel-like)	-1.75515	1451146_at
Dnahc1	dynein, axonemal, heavy chain 1	-1.75411	1434594_at
1700026L06Rik	RIKEN cDNA 1700026L06 gene	-1.7522	1452904_at
Lpp	LIM domain containing preferred translocation partner in lipoma	-1.75051	1454899_at
Ttc39b	tetratricopeptide repeat domain 39B	-1.75001	1452008_at
Rec8	REC8 homolog (yeast)	-1.74907	1419147_at
Hmgn3	high mobility group nucleosomal binding domain 3	-1.74865	1434875_a_at
Il17rc	interleukin 17 receptor C	-1.74845	1419671_a_at
Mdfi	MyoD family inhibitor	-1.74655	1425924_at
Sox4	SRY-box containing gene 4	-1.74654	1433575_at
Hsd17b7	hydroxysteroid (17-beta) dehydrogenase 7	-1.74481	1457248_x_at
Tmem161a	transmembrane protein 161A	-1.74462	1426212_s_at
Ocel1	occludin/ELL domain containing 1	-1.74424	1425191_at
Ccdc102a	coiled-coil domain containing 102A	-1.74394	1427962_at
Ccdc46	coiled-coil domain containing 46	-1.74268	1427205_x_at
Ptpn22	protein tyrosine phosphatase, non-receptor type 22 (lymphoid)	-1.74158	1417995_at
Zcchc18	zinc finger, CCHC domain containing 18	-1.74128	1425293_a_at
Tcea2	transcription elongation factor A (SII), 2	-1.74094	1440791_x_at
Arhgap5	Rho GTPase activating protein 5	-1.74063	1423194_at
Pak1	p21 (CDKN1A)-activated kinase 1	-1.74008	1450070_s_at
Cyp4v3	cytochrome P450, family 4, subfamily v, polypeptide 3	-1.74005	1417071_s_at
Ppfia4	protein tyrosine phosphatase, receptor type, f polypeptide (PTPRF), interacting protein (liprin), alpha 4	-1.73811	1428578_s_at
2810055G20Rik	RIKEN cDNA 2810055G20 gene	-1.73556	1431424_at
Plscr4	phospholipid scramblase 4	-1.73505	1433626_at
Sox12	SRY-box containing gene 12	-1.73251	1439754_at
Unc45b	unc-45 homolog B (C. elegans)	-1.73181	1436939_at
Dtymk	deoxythymidylate kinase	-1.73168	1438096_a_at
Cacnb2	calcium channel, voltage-dependent, beta 2 subunit	-1.73166	1456401_at
Bambi	BMP and activin membrane-bound inhibitor, homolog (Xenopus laevis)	-1.7286	1423753_at
Cox7a1	cytochrome c oxidase, subunit VIIa 1	-1.72843	1418709_at
Flt3	FMS-like tyrosine kinase 3	-1.72618	1419538_at
Itgav	integrin alpha V	-1.72566	1452784_at
AU015603	expressed sequence AU015603	-1.72514	1441607_at
Pltp	phospholipid transfer protein	-1.72467	1456424_s_at
Scyl3	SCY1-like 3 (S. cerevisiae)	1.50068	1428918_at
Il2rg	interleukin 2 receptor, gamma chain	1.50079	1416296_at
Rtn4ip1	reticulon 4 interacting protein 1	1.50098	1417668_at
Ralgps2	Ral GEF with PH domain and SH3 binding motif 2	1.50215	1428789_at
3110009E22Rik	RIKEN cDNA 3110009E22 gene	1.5023	1454035_at
Clk2	CDC-like kinase 2	1.50255	1417743_at
Gnl2	guanine nucleotide binding protein-like 2 (nucleolar)	1.50291	1426579_at
Sppl3	signal peptide peptidase 3	1.5033	1451073_at
Tgfb1	transforming growth factor, beta 1	1.50335	1445360_at
Mbnl3	muscleblind-like 3 (Drosophila)	1.50361	1434678_at
Runx1	runt related transcription factor 1	1.50405	1427650_a_at
Polr1e	polymerase (RNA) I polypeptide E	1.50406	1419058_at
Ercc3	excision repair cross-complementing rodent repair deficiency, complementation group 3	1.50433	1448497_at
Phf3	PHD finger protein 3	1.50483	1452441_at
Col1a2	collagen, type I, alpha 2	1.50484	1423110_at
Rab3d	RAB3D, member RAS oncogene family	1.50542	1418891_a_at
1700020I14Rik	RIKEN cDNA 1700020I14 gene	1.50557	1430989_a_at
Pon2	paraoxonase 2	1.50588	1429019_s_at
Polr3k	polymerase (RNA) III (DNA directed) polypeptide K	1.50648	1439266_a_at
Ifi47	interferon gamma inducible protein 47	1.50707	1417292_at
Car2	carbonic anhydrase 2	1.50723	1448752_at
Zmym2	zinc finger, MYM-type 2	1.50757	1428941_at
Hsdl1	hydroxysteroid dehydrogenase like 1	1.50789	1454996_at
Garnl4	GTPase activating RANGAP domain-like 4	1.5083	1434754_at
C80913	expressed sequence C80913	1.50939	1419274_at
Trim25	tripartite motif-containing 25	1.50944	1426415_a_at
Actr1b	ARP1 actin-related protein 1 homolog B, centractin beta (yeast)	1.50961	1426403_at
Edem1	ER degradation enhancer, mannosidase alpha-like 1	1.50982	1451218_at
Usp1	ubiquitin specific peptdiase 1	1.50986	1423674_at
Alkbh5	alkB, alkylation repair homolog 5 (E. coli)	1.51003	1437728_at
Dok2	docking protein 2	1.5106	1416333_at
Arrb2	arrestin, beta 2	1.51122	1426239_s_at
Mrps16	mitochondrial ribosomal protein S16	1.51157	1448869_a_at
Slc25a5	solute carrier family 25 (mitochondrial carrier, adenine nucleotide translocator), member 5	1.51222	1438546_x_at
Lpin2	lipin 2	1.51236	1446316_at
Ing3	inhibitor of growth family, member 3	1.5131	1422806_x_at
Traf5	Tnf receptor-associated factor 5	1.5135	1448861_at
Scrib	scribbled homolog (Drosophila)	1.51375	1427064_a_at
Nudcd3	NudC domain containing 3	1.51415	1460395_at
Tbl1x	transducin (beta)-like 1 X-linked	1.51422	1434643_at
Map3k7	mitogen-activated protein kinase kinase kinase 7	1.51473	1425795_a_at
Mesdc2	mesoderm development candidate 2	1.51544	1416181_at
Acp1	acid phosphatase 1, soluble	1.51545	1450720_at
Sfrs8	splicing factor, arginine/serine-rich 8	1.51554	1434966_at
Necap2	NECAP endocytosis associated 2	1.51627	1418962_at
Aars	alanyl-tRNA synthetase	1.51638	1451083_s_at
Kif13a	kinesin family member 13A	1.51688	1455746_at
Gpn1	GPN-loop GTPase 1	1.51752	1442114_at
Vps4a	vacuolar protein sorting 4a (yeast)	1.5179	1417510_at
Add1	adducin 1 (alpha)	1.51798	1450054_at
Ddost	dolichyl-di-phosphooligosaccharide-protein glycotransferase	1.5186	1416493_at
Eif2ak2	eukaryotic translation initiation factor 2-alpha kinase 2	1.51907	1422005_at
Smc6	structural maintenance of chromosomes 6	1.51912	1422909_at
Thrap3	thyroid hormone receptor associated protein 3	1.5192	1427408_a_at
Rad51ap1	RAD51 associated protein 1	1.51957	1448899_s_at
Tprkb	Tp53rk binding protein	1.52029	1425410_at
9030617O03Rik	RIKEN cDNA 9030617O03 gene	1.5203	1424226_at
Ldlrap1	low density lipoprotein receptor adaptor protein 1	1.52034	1458060_at
D16Ertd472e	DNA segment, Chr 16, ERATO Doi 472, expressed	1.52044	1424724_a_at
Guk1	guanylate kinase 1	1.52064	1416395_at
A930026I22Rik	RIKEN cDNA A930026I22 gene	1.52073	1453062_at
Ado	2-aminoethanethiol (cysteamine) dioxygenase	1.52093	1442135_at
Tkt	transketolase	1.52095	1439443_x_at
Noc4l	nucleolar complex associated 4 homolog (S. cerevisiae)	1.52126	1423827_s_at
Pabpn1	poly(A) binding protein, nuclear 1	1.52206	1415728_at
1810009O10Rik	RIKEN cDNA 1810009O10 gene	1.52311	1451334_at
Slco3a1	solute carrier organic anion transporter family, member 3a1	1.52317	1418030_at
RP23-143A14.5	candidate tumor suppressor in ovarian cancer 2	1.5234	1418335_a_at
Tmem115	transmembrane protein 115	1.52344	1448567_at
Pus7l	pseudouridylate synthase 7 homolog (S. cerevisiae)-like	1.52346	1460447_at
Gapvd1	GTPase activating protein and VPS9 domains 1	1.52502	1429455_at
Pabpc4	poly A binding protein, cytoplasmic 4	1.52513	1421046_a_at
Wdr32	WD repeat domain 32	1.52571	1438727_at
Tmem160	transmembrane protein 160	1.52694	1460424_at
Pak2	p21 (CDKN1A)-activated kinase 2	1.52705	1434250_at
Ube4a	ubiquitination factor E4A, UFD2 homolog (S. cerevisiae)	1.5272	1425278_at
1300001I01Rik	RIKEN cDNA 1300001I01 gene	1.52724	1428106_at
Aasdhppt	aminoadipate-semialdehyde dehydrogenase-phosphopantetheinyl transferase	1.52758	1430515_s_at
Rasa3	RAS p21 protein activator 3	1.5276	1415850_at
Ptdss1	phosphatidylserine synthase 1	1.52859	1441866_s_at
Ero1l	ERO1-like (S. cerevisiae)	1.52886	1449324_at
Pygb	brain glycogen phosphorylase	1.52889	1433504_at
Pip4k2a	phosphatidylinositol-5-phosphate 4-kinase, type II, alpha	1.52895	1449404_at
Gna13	guanine nucleotide binding protein, alpha 13	1.52925	1422555_s_at
Nudt5	nudix (nucleoside diphosphate linked moiety X)-type motif 5	1.5293	1448651_at
Farsb	phenylalanyl-tRNA synthetase, beta subunit	1.52946	1435103_x_at
Hsd17b4	hydroxysteroid (17-beta) dehydrogenase 4	1.52949	1417369_at
D11Ertd717e	DNA segment, Chr 11, ERATO Doi 717, expressed	1.52971	1457579_at
Ifnar2	interferon (alpha and beta) receptor 2	1.52984	1427691_a_at
Rbck1	RanBP-type and C3HC4-type zinc finger containing 1	1.53044	1415792_at
Ehd1	EH-domain containing 1	1.53126	1448175_at
Eprs	glutamyl-prolyl-tRNA synthetase	1.53163	1452158_at
Zdhhc14	zinc finger, DHHC domain containing 14	1.53189	1423668_at
Zfp259	zinc finger protein 259	1.53192	1428294_at
Lsm7	LSM7 homolog, U6 small nuclear RNA associated (S. cerevisiae)	1.53212	1417313_at
Tubb5	tubulin, beta 5	1.53247	1416256_a_at
Rabgap1l	RAB GTPase activating protein 1-like	1.53248	1429196_at
Wdr26	WD repeat domain 26	1.53273	1451188_at
Nat10	N-acetyltransferase 10	1.53303	1433692_at
Zfp106	zinc finger protein 106	1.53387	1425331_at
Ssr1	signal sequence receptor, alpha	1.53416	1417763_at
Eef2	eukaryotic translation elongation factor 2	1.53445	1424736_at
Pcbp2	poly(rC) binding protein 2	1.53454	1421743_a_at
Got2	glutamate oxaloacetate transaminase 2, mitochondrial	1.53489	1417715_a_at
Rpn1	ribophorin I	1.53499	1439257_x_at
Ncapd2	non-SMC condensin I complex, subunit D2	1.53505	1423847_at
Zswim1	zinc finger, SWIM domain containing 1	1.53527	1451189_at
Grcc10	gene rich cluster, C10 gene	1.53534	1416522_a_at
6620401M08Rik	RIKEN cDNA 6620401M08 gene	1.53552	1453049_at
Gan	giant axonal neuropathy	1.53565	1439615_at
Wdr40a	WD repeat domain 40A	1.53591	1429392_at
G3bp1	Ras-GTPase-activating protein SH3-domain binding protein 1	1.53602	1422801_at
Dync1h1	dynein cytoplasmic 1 heavy chain 1	1.53685	1439950_at
Spata5l1	spermatogenesis associated 5-like 1	1.53698	1455863_at
Acaa2	acetyl-Coenzyme A acyltransferase 2 (mitochondrial 3-oxoacyl-Coenzyme A thiolase)	1.53706	1455061_a_at
Slc11a2	solute carrier family 11 (proton-coupled divalent metal ion transporters), member 2	1.5377	1441709_at
Stxbp2	syntaxin binding protein 2	1.53784	1448341_a_at
Git2	G protein-coupled receptor kinase-interactor 2	1.53788	1435925_at
Gng12	guanine nucleotide binding protein (G protein), gamma 12	1.53855	1421947_at
Ppox	protoporphyrinogen oxidase	1.53859	1416618_at
Zfx	zinc finger protein X-linked	1.53895	1428047_s_at
2610204K14Rik	RIKEN cDNA 2610204K14 gene	1.53916	1428966_at
Itga4	integrin alpha 4	1.5395	1456498_at
Siah2	seven in absentia 2	1.53967	1448170_at
Copz1	coatomer protein complex, subunit zeta 1	1.54038	1451825_a_at
Uchl5ip	UCHL5 interacting protein	1.54127	1424277_at
Cyld	cylindromatosis (turban tumor syndrome)	1.54168	1429617_at
Centg2	centaurin, gamma 2	1.54191	1435432_at
Nup160	nucleoporin 160	1.542	1418530_at
2310003F16Rik	RIKEN cDNA 2310003F16 gene	1.54276	1425087_at
Tars2	threonyl-tRNA synthetase 2, mitochondrial (putative)	1.54332	1431125_a_at
E2f8	E2F transcription factor 8	1.54344	1436186_at
Kat2a	K(lysine) acetyltransferase 2A	1.54385	1422972_s_at
Pcdh7	protocadherin 7	1.54417	1437442_at
2400003C14Rik	RIKEN cDNA 2400003C14 gene	1.54453	1423837_at
Adprhl2	ADP-ribosylhydrolase like 2	1.54462	1427449_a_at
Mc1r	melanocortin 1 receptor	1.54465	1435393_at
Phf3	PHD finger protein 3	1.5452	1428999_at
Mpp6	membrane protein, palmitoylated 6 (MAGUK p55 subfamily member 6)	1.54524	1449348_at
D17Wsu104e	DNA segment, Chr 17, Wayne State University 104, expressed	1.54581	1416696_at
Baz1a	bromodomain adjacent to zinc finger domain 1A	1.54583	1433599_at
Atp13a3	ATPase type 13A3	1.54584	1443868_at
Nin	ninein	1.54696	1444155_at
Mrpl15	mitochondrial ribosomal protein L15	1.54725	1434970_a_at
D4Ertd617e	DNA segment, Chr 4, ERATO Doi 617, expressed	1.5479	1439898_at
Bap1	Brca1 associated protein 1	1.54795	1426354_at
Serpina3g	serine (or cysteine) peptidase inhibitor, clade A, member 3G	1.54874	1424923_at
Gna13	guanine nucleotide binding protein, alpha 13	1.54913	1450656_at
Xk	Kell blood group precursor (McLeod phenotype) homolog	1.54942	1453866_a_at
H2-Aa	histocompatibility 2, class II antigen A, alpha	1.54948	1452431_s_at
Msh3	mutS homolog 3 (E. coli)	1.54956	1424166_at
Orc6l	origin recognition complex, subunit 6-like (S. cerevisiae)	1.55036	1417037_at
Mbd4	methyl-CpG binding domain protein 4	1.5508	1449490_at
Thoc3	THO complex 3	1.55118	1423971_at
1110007M04Rik	RIKEN cDNA 1110007M04 gene	1.5513	1427997_at
Psen1	presenilin 1	1.55139	1421853_at
Dynll1	dynein light chain LC8-type 1	1.55141	1456125_a_at
Wdfy1	WD repeat and FYVE domain containing 1	1.5518	1424749_at
Eya3	eyes absent 3 homolog (Drosophila)	1.55207	1420933_a_at
Stip1	stress-induced phosphoprotein 1	1.55251	1415909_at
Ccdc93	coiled-coil domain containing 93	1.55281	1426928_at
Trove2	TROVE domain family, member 2	1.55347	1436533_at
Pdcd2l	programmed cell death 2-like	1.55357	1426845_at
Bri3bp	Bri3 binding protein	1.55363	1438198_at
Cox6b1	cytochrome c oxidase, subunit VIb polypeptide 1	1.55367	1416565_at
Ryr3	ryanodine receptor 3	1.55407	1452996_a_at
Pdxk	pyridoxal (pyridoxine, vitamin B6) kinase	1.5541	1427930_at
Nars	asparaginyl-tRNA synthetase	1.5541	1428666_at
Lrp10	low-density lipoprotein receptor-related protein 10	1.55412	1416836_at
Heatr3	HEAT repeat containing 3	1.55467	1456597_at
2210009G21Rik	RIKEN cDNA 2210009G21 gene	1.55482	1430673_a_at
Mrpl52	mitochondrial ribosomal protein L52	1.55507	1415762_x_at
Wdr37	WD repeat domain 37	1.5553	1434076_at
Apeh	acylpeptide hydrolase	1.5555	1426030_a_at
Yrdc	yrdC domain containing (E.coli)	1.55592	1434744_at
E430028B21Rik	RIKEN cDNA E430028B21 gene	1.55598	1454963_at
Matr3	matrin 3	1.55693	1441272_at
2310044G17Rik	RIKEN cDNA 2310044G17 gene	1.55721	1424914_at
Shmt1	serine hydroxymethyltransferase 1 (soluble)	1.5573	1425179_at
Mrps9	mitochondrial ribosomal protein S9	1.55733	1418034_at
Cdyl	chromodomain protein, Y chromosome-like	1.55774	1418071_s_at
Ptch1	patched homolog 1	1.55775	1428853_at
Lamp1	lysosomal-associated membrane protein 1	1.5582	1415880_a_at
Apip	APAF1 interacting protein	1.55822	1418254_at
Nup37	nucleoporin 37	1.55833	1423969_at
Orc5l	origin recognition complex, subunit 5-like (S. cerevisiae)	1.5585	1415830_at
Nfkbib	nuclear factor of kappa light polypeptide gene enhancer in B-cells inhibitor, beta	1.55862	1421266_s_at
Cxxc1	CXXC finger 1 (PHD domain)	1.55868	1452221_a_at
Hint1	histidine triad nucleotide binding protein 1	1.55871	1424018_at
Cog8	component of oligomeric golgi complex 8	1.55884	1426821_at
C030007I09Rik	RIKEN cDNA C030007I09 gene	1.55896	1441980_at
2610029I01Rik	RIKEN cDNA 2610029I01 gene	1.55919	1428897_at
Stam2	signal transducing adaptor molecule (SH3 domain and ITAM motif) 2	1.55957	1416975_at
Cks2	CDC28 protein kinase regulatory subunit 2	1.55986	1417457_at
H2-Eb1	histocompatibility 2, class II antigen E beta	1.56082	1417025_at
Smarca5	SWI/SNF related, matrix associated, actin dependent regulator of chromatin, subfamily a, member 5	1.56084	1424206_at
Ncf4	neutrophil cytosolic factor 4	1.56123	1418465_at
Slc27a4	solute carrier family 27 (fatty acid transporter), member 4	1.56164	1424441_at
Mtmr4	myotubularin related protein 4	1.56168	1418151_at
Grn	granulin	1.56176	1456567_x_at
Zfp91	zinc finger protein 91	1.56192	1422033_a_at
Recql	RecQ protein-like	1.56193	1418339_at
Nucks1	nuclear casein kinase and cyclin-dependent kinase substrate 1	1.56211	1444953_at
Cpsf2	cleavage and polyadenylation specific factor 2	1.56226	1431089_at
Dusp11	dual specificity phosphatase 11 (RNA/RNP complex 1-interacting)	1.56251	1452594_at
Gpsn2	glycoprotein, synaptic 2	1.56251	1416352_s_at
Denr	density-regulated protein	1.56252	1420368_at
LOC100043766	Ppp1r14c pseudogene	1.56297	1453465_x_at
Dna2	DNA replication helicase 2 homolog (yeast)	1.56322	1457909_at
Sel1l	sel-1 suppressor of lin-12-like (C. elegans)	1.56328	1436774_at
Fdps	farnesyl diphosphate synthetase	1.56343	1423418_at
3110027N22Rik	RIKEN cDNA 3110027N22 gene	1.5637	1430252_at
Slc1a5	solute carrier family 1 (neutral amino acid transporter), member 5	1.56376	1416629_at
Add2	adducin 2 (beta)	1.56419	1431076_at
Pdia2	protein disulfide isomerase associated 2	1.56437	1428952_at
Pygo2	pygopus 2	1.56466	1428249_at
LOC100043766	Ppp1r14c pseudogene	1.5653	1430286_s_at
4933425L03Rik	RIKEN cDNA 4933425L03 gene	1.5659	1436143_at
Eef1g	eukaryotic translation elongation factor 1 gamma	1.56615	1417364_at
Uck2	uridine-cytidine kinase 2	1.56637	1439741_x_at
Fgd6	FYVE, RhoGEF and PH domain containing 6	1.56663	1419322_at
Wdr26	WD repeat domain 26	1.56678	1423961_at
Cdc34	cell division cycle 34 homolog (S. cerevisiae)	1.56741	1434879_at
Enpp1	ectonucleotide pyrophosphatase/phosphodiesterase 1	1.56794	1459546_s_at
Sfxn1	sideroflexin 1	1.568	1417559_at
Ublcp1	ubiquitin-like domain containing CTD phosphatase 1	1.56919	1454947_a_at
Aspm	asp (abnormal spindle)-like, microcephaly associated (Drosophila)	1.57122	1458560_at
Whsc1l1	Wolf-Hirschhorn syndrome candidate 1-like 1 (human)	1.57139	1442085_at
Psap	prosaposin	1.57139	1415687_a_at
Fuca1	fucosidase, alpha-L- 1, tissue	1.57203	1437772_s_at
Nudt19	nudix (nucleoside diphosphate linked moiety X)-type motif 19	1.57227	1432332_a_at
Tasp1	taspase, threonine aspartase 1	1.57235	1451998_at
Ttc13	tetratricopeptide repeat domain 13	1.57265	1451351_at
Ptbp1	polypyrimidine tract binding protein 1	1.57297	1424874_a_at
Stx18	syntaxin 18	1.57332	1453819_x_at
Sfrs4	splicing factor, arginine/serine-rich 4 (SRp75)	1.57349	1448778_at
Tfrc	transferrin receptor	1.57401	1422967_a_at
Nucb1	nucleobindin 1	1.57419	1416903_at
Lmtk2	lemur tyrosine kinase 2	1.57459	1455018_at
5730593F17Rik	RIKEN cDNA 5730593F17 gene	1.57466	1433639_at
Tm2d3	TM2 domain containing 3	1.57511	1434738_at
Prc1	protein regulator of cytokinesis 1	1.57558	1423774_a_at
Oaf	OAF homolog (Drosophila)	1.57608	1424086_at
Sdccag3	serologically defined colon cancer antigen 3	1.57625	1429554_at
Stag1	stromal antigen 1	1.57651	1450420_at
8430408G22Rik	RIKEN cDNA 8430408G22 gene	1.57711	1433836_a_at
Hnrnpm	heterogeneous nuclear ribonucleoprotein M	1.5772	1426698_a_at
Iars2	isoleucine-tRNA synthetase 2, mitochondrial	1.57736	1426735_at
Stat3	signal transducer and activator of transcription 3	1.57747	1426587_a_at
6330578E17Rik	RIKEN cDNA 6330578E17 gene	1.57805	1426355_a_at
Unc119b	unc-119 homolog B (C. elegans)	1.57819	1460733_at
Spire1	spire homolog 1 (Drosophila)	1.57937	1458203_at
Azin1	antizyme inhibitor 1	1.57944	1422702_at
Grpel1	GrpE-like 1, mitochondrial	1.57998	1417320_at
Glrx2	glutaredoxin 2 (thioltransferase)	1.58029	1437680_x_at
Spn	sialophorin	1.58052	1422133_at
Slc25a33	solute carrier family 25, member 33	1.58061	1424211_at
Fbxw4	F-box and WD-40 domain protein 4	1.58091	1417226_at
Ppfia1	protein tyrosine phosphatase, receptor type, f polypeptide (PTPRF), interacting protein, alpha 1	1.58162	1435861_at
Pard6g	par-6 partitioning defective 6 homolog gamma (C. elegans)	1.58214	1420851_at
Sbds	Shwachman-Bodian-Diamond syndrome homolog (human)	1.58228	1426480_at
BC067047	cDNA sequence BC067047	1.58281	1434069_at
Psmd12	proteasome (prosome, macropain) 26S subunit, non-ATPase, 12	1.58327	1448492_a_at
Cd93	CD93 antigen	1.58338	1456046_at
BC017643	cDNA sequence BC017643	1.58362	1423678_at
Nsf	N-ethylmaleimide sensitive fusion protein	1.58371	1422455_s_at
Mtmr9	myotubularin related protein 9	1.58394	1452254_at
Ms4a4c	membrane-spanning 4-domains, subfamily A, member 4C	1.58406	1450291_s_at
Pstpip2	proline-serine-threonine phosphatase-interacting protein 2	1.58428	1455405_at
A130012E19Rik	RIKEN cDNA A130012E19 gene	1.58532	1440671_at
Tlk1	tousled-like kinase 1	1.58551	1439158_at
Ifi30	interferon gamma inducible protein 30	1.58569	1422476_at
Zfp445	zinc finger protein 445	1.58572	1427254_at
Farsb	phenylalanyl-tRNA synthetase, beta subunit	1.58573	1423709_s_at
Acad11	acyl-Coenzyme A dehydrogenase family, member 11	1.58588	1454647_at
Ascc1	activating signal cointegrator 1 complex subunit 1	1.58591	1460703_at
Yipf6	Yip1 domain family, member 6	1.58682	1430024_at
Pdap1	PDGFA associated protein 1	1.58704	1434020_at
Anp32a	acidic (leucine-rich) nuclear phosphoprotein 32 family, member A	1.5872	1450407_a_at
Alkbh5	alkB, alkylation repair homolog 5 (E. coli)	1.58727	1434701_at
Lmnb2	lamin B2	1.58735	1448531_at
Ube2a	ubiquitin-conjugating enzyme E2A, RAD6 homolog (S. cerevisiae)	1.58763	1448772_at
Lpcat1	lysophosphatidylcholine acyltransferase 1	1.58769	1424459_at
Bri3bp	Bri3 binding protein	1.58799	1428744_s_at
Ubac1	ubiquitin associated domain containing 1	1.58852	1416963_at
Eef1d	eukaryotic translation elongation factor 1 delta (guanine nucleotide exchange protein)	1.58856	1428135_a_at
Tmem177	transmembrane protein 177	1.58865	1428957_at
AK122209	cDNA sequence AK122209	1.58878	1435379_at
Evi2a	ecotropic viral integration site 2a	1.58911	1450241_a_at
Txn2	thioredoxin 2	1.58913	1452782_a_at
Ehd1	EH-domain containing 1	1.58916	1416010_a_at
Usp4	ubiquitin specific peptidase 4 (proto-oncogene)	1.58924	1450892_a_at
Dynll1	dynein light chain LC8-type 1	1.5907	1417339_a_at
Ddx6	DEAD (Asp-Glu-Ala-Asp) box polypeptide 6	1.59089	1439122_at
Nqo2	NAD(P)H dehydrogenase, quinone 2	1.59104	1455590_at
Mett10d	methyltransferase 10 domain containing	1.59109	1453983_a_at
Dnajc25	DnaJ (Hsp40) homolog, subfamily C , member 25	1.592	1444108_at
Cep152	centrosomal protein 152	1.59229	1427496_at
Hira	histone cell cycle regulation defective homolog A (S. cerevisiae)	1.59322	1450050_at
Heatr6	HEAT repeat containing 6	1.59323	1424687_at
Ifi35	interferon-induced protein 35	1.59329	1459151_x_at
Ube2g2	ubiquitin-conjugating enzyme E2G 2	1.5933	1417032_at
Tbrg4	transforming growth factor beta regulated gene 4	1.59348	1448796_s_at
Maf1	MAF1 homolog (S. cerevisiae)	1.59369	1451126_at
Gclc	glutamate-cysteine ligase, catalytic subunit	1.59408	1424296_at
Gfm1	G elongation factor, mitochondrial 1	1.59411	1416570_s_at
Gars	glycyl-tRNA synthetase	1.59464	1423784_at
Brp16	brain protein 16	1.59472	1419046_at
Dapk2	death-associated protein kinase 2	1.59473	1451453_at
4930453N24Rik	RIKEN cDNA 4930453N24 gene	1.59566	1423976_at
Stk16	serine/threonine kinase 16	1.5957	1426160_a_at
Rpl8	ribosomal protein L8	1.59574	1417762_a_at
Zbtb34	zinc finger and BTB domain containing 34	1.59602	1436085_at
Sergef	secretion regulating guanine nucleotide exchange factor	1.59643	1419217_at
Ep400	E1A binding protein p400	1.59726	1437020_at
Ino80e	NO80 complex subunit E	1.59736	1424428_at
Gnb2l1	guanine nucleotide binding protein (G protein), beta polypeptide 2 like 1	1.59784	1455168_a_at
Gbf1	golgi-specific brefeldin A-resistance factor 1	1.59791	1438207_at
Glg1	golgi apparatus protein 1	1.5981	1460554_s_at
D15Wsu75e	DNA segment, Chr 15, Wayne State University 75, expressed	1.59844	1460689_at
Ints6	integrator complex subunit 6	1.59871	1443128_at
Elf2	E74-like factor 2	1.59888	1418275_a_at
Rtn4	reticulon 4	1.59907	1421116_a_at
Bxdc5	brix domain containing 5	1.59924	1431784_a_at
Rnf4	ring finger protein 4	1.59937	1451072_a_at
Leprot	leptin receptor overlapping transcript	1.5998	1424438_a_at
Ak2	adenylate kinase 2	1.59998	1448450_at
Thoc5	THO complex 5	1.60009	1452672_at
2510039O18Rik	RIKEN cDNA 2510039O18 gene	1.60027	1451078_at
Zbtb22	zinc finger and BTB domain containing 22	1.60053	1448705_at
Nans	N-acetylneuraminic acid synthase (sialic acid synthase)	1.6006	1417774_at
Fis1	fission 1 (mitochondrial outer membrane) homolog (yeast)	1.60082	1416764_at
Ctr9	Ctr9, Paf1/RNA polymerase II complex component, homolog (S. cerevisiae)	1.60099	1422679_s_at
Iah1	isoamyl acetate-hydrolyzing esterase 1 homolog (S. cerevisiae)	1.60179	1429119_at
Sart3	squamous cell carcinoma antigen recognized by T-cells 3	1.60183	1417548_at
E030024N20Rik	RIKEN cDNA E030024N20 gene	1.60191	1430386_at
St3gal5	ST3 beta-galactoside alpha-2,3-sialyltransferase 5	1.60203	1449198_a_at
Nubp1	nucleotide binding protein 1	1.60208	1418905_at
1700054N08Rik	RIKEN cDNA 1700054N08 gene	1.60231	1424796_at
Mcart1	mitochondrial carrier triple repeat 1	1.60261	1433816_at
Cx3cr1	chemokine (C-X3-C) receptor 1	1.6027	1450020_at
Pkig	protein kinase inhibitor, gamma	1.60307	1423945_a_at
Zfp593	zinc finger protein 593	1.6032	1449946_a_at
LOC100040592	similar to Hmgcs1 protein	1.60355	1433444_at
Pdap1	PDGFA associated protein 1	1.60381	1434019_at
Mrs2	MRS2 magnesium homeostasis factor homolog (S. cerevisiae)	1.6041	1435548_at
Shmt2	serine hydroxymethyltransferase 2 (mitochondrial)	1.60427	1426423_at
Ptpmt1	protein tyrosine phosphatase, mitochondrial 1	1.6044	1426581_at
Tmed10	transmembrane emp24-like trafficking protein 10 (yeast)	1.60474	1424708_at
Nmt1	N-myristoyltransferase 1	1.60475	1415683_at
Nhp2l1	NHP2 non-histone chromosome protein 2-like 1 (S. cerevisiae)	1.60603	1416973_at
Rbm28	RNA binding motif protein 28	1.60641	1452091_a_at
Rhog	ras homolog gene family, member G	1.60669	1422572_at
Otud7b	OTU domain containing 7B	1.6076	1457716_at
Prdx1	peroxiredoxin 1	1.60767	1416000_a_at
Ddx19a	DEAD (Asp-Glu-Ala-Asp) box polypeptide 19a	1.60817	1417927_at
Stxbp2	syntaxin binding protein 2	1.60898	1416449_x_at
Xpo4	exportin 4	1.60982	1421054_at
Psme4	proteasome (prosome, macropain) activator subunit 4	1.60987	1426824_at
Wipi2	WD repeat domain, phosphoinositide interacting 2	1.61	1429367_at
OTTMUSG00000008305	predicted gene, OTTMUSG00000008305	1.6101	1459657_s_at
Tysnd1	trypsin domain containing 1	1.61028	1428689_at
Pbx4	pre-B-cell leukemia homeobox 4	1.61039	1449916_at
Recql4	RecQ protein-like 4	1.61041	1422922_at
Tmed7	transmembrane emp24 protein transport domain containing 7	1.61073	1429187_at
9130404D14Rik	RIKEN cDNA 9130404D14 gene	1.61082	1426812_a_at
Kif5b	kinesin family member 5B	1.61101	1418427_at
Tbcb	tubulin folding cofactor B	1.6117	1448533_at
Srebf2	sterol regulatory element binding factor 2	1.6125	1426744_at
Ppp1r10	protein phosphatase 1, regulatory subunit 10	1.61397	1426726_at
40067	septin 11	1.61526	1429233_at
Narg1	NMDA receptor-regulated gene 1	1.61536	1418022_at
Nudt7	nudix (nucleoside diphosphate linked moiety X)-type motif 7	1.61537	1430896_s_at
Ibtk	inhibitor of Bruton agammaglobulinemia tyrosine kinase	1.61543	1454905_at
Rps18	ribosomal protein S18	1.61582	1448739_x_at
Cnot8	CCR4-NOT transcription complex, subunit 8	1.61611	1451102_at
Ms4a2	membrane-spanning 4-domains, subfamily A, member 2	1.61666	1421475_at
Cyb5b	cytochrome b5 type B	1.61684	1417766_at
Arl6ip6	ADP-ribosylation factor-like 6 interacting protein 6	1.61709	1424021_at
Bub1	budding uninhibited by benzimidazoles 1 homolog (S. cerevisiae)	1.61761	1424046_at
39874	membrane-associated ring finger (C3HC4) 2	1.61867	1424888_at
Map3k7ip1	mitogen-activated protein kinase kinase kinase 7 interacting protein 1	1.61889	1426898_at
Pde3b	phosphodiesterase 3B, cGMP-inhibited	1.61912	1433694_at
Itm2b	integral membrane protein 2B	1.61997	1418000_a_at
Cd55	CD55 antigen	1.62028	1443906_at
2310002J21Rik	RIKEN cDNA 2310002J21 gene	1.62047	1452883_a_at
2810408I11Rik	RIKEN cDNA 2810408I11 gene	1.62074	1437549_at
Creg1	cellular repressor of E1A-stimulated genes 1	1.62085	1415947_at
Abcc5	ATP-binding cassette, sub-family C (CFTR/MRP), member 5	1.62093	1418043_at
Nomo1	nodal modulator 1	1.62103	1451170_s_at
Exoc8	exocyst complex component 8	1.62108	1436048_at
P2ry1	purinergic receptor P2Y, G-protein coupled 1	1.6212	1421456_at
Dhx38	DEAH (Asp-Glu-Ala-His) box polypeptide 38	1.62127	1426786_s_at
2010301N04Rik	RIKEN cDNA 2010301N04 gene	1.62128	1430297_a_at
Jag2	jagged 2	1.62139	1452919_a_at
1200003I07Rik	RIKEN cDNA 1200003I07 gene	1.62144	1429473_at
Klf6	Kruppel-like factor 6	1.62194	1447448_s_at
Kctd20	potassium channel tetramerisation domain containing 20	1.62195	1448302_at
Ppih	peptidyl prolyl isomerase H	1.62247	1424136_a_at
Usp39	ubiquitin specific peptidase 39	1.62316	1460209_at
Ifi35	interferon-induced protein 35	1.62349	1424617_at
Rsc1a1	regulatory solute carrier protein, family 1, member 1	1.624	1422560_at
Eif2b5	eukaryotic translation initiation factor 2B, subunit 5 epsilon	1.62455	1433886_at
Peli2	pellino 2	1.62476	1437181_at
Clspn	claspin homolog (Xenopus laevis)	1.62526	1456280_at
Ddx18	DEAD (Asp-Glu-Ala-Asp) box polypeptide 18	1.62538	1416071_at
Pold1	polymerase (DNA directed), delta 1, catalytic subunit	1.62625	1448187_at
Picalm	phosphatidylinositol binding clathrin assembly protein	1.62648	1451316_a_at
2510003E04Rik	RIKEN cDNA 2510003E04 gene	1.62677	1452874_at
Mcat	malonyl CoA:ACP acyltransferase (mitochondrial)	1.62679	1452216_at
Ppp2r1b	protein phosphatase 2 (formerly 2A), regulatory subunit A (PR 65), beta isoform	1.62831	1428265_at
Rbm39	RNA binding motif protein 39	1.6285	1439316_at
Mical3	microtubule associated monoxygenase, calponin and LIM domain containing 3	1.6286	1434221_at
Rpn1	ribophorin I	1.62888	1438943_x_at
Arfrp1	ADP-ribosylation factor related protein 1	1.62921	1425507_at
Ugcg	UDP-glucose ceramide glucosyltransferase	1.62991	1435133_at
Aurka	aurora kinase A	1.63024	1424511_at
Ggnbp2	gametogenetin binding protein 2	1.63046	1459917_at
Cisd1	CDGSH iron sulfur domain 1	1.6313	1416849_at
Lss	lanosterol synthase	1.63144	1420013_s_at
Ube2i	ubiquitin-conjugating enzyme E2I	1.63148	1422712_a_at
1110034G24Rik	RIKEN cDNA 1110034G24 gene	1.63241	1452888_at
Wsb2	WD repeat and SOCS box-containing 2	1.63249	1421847_at
Nudt4	nudix (nucleoside diphosphate linked moiety X)-type motif 4	1.633	1449107_at
Gart	phosphoribosylglycinamide formyltransferase	1.63327	1416283_at
Mbd2	methyl-CpG binding domain protein 2	1.63355	1425803_a_at
Pak1ip1	PAK1 interacting protein 1	1.63361	1430875_a_at
Psme3	proteaseome (prosome, macropain) 28 subunit, 3	1.63414	1418079_at
Ndufab1	NADH dehydrogenase (ubiquinone) 1, alpha/beta subcomplex, 1	1.63425	1428159_s_at
Lzic	leucine zipper and CTNNBIP1 domain containing	1.63473	1429306_at
Bola2	bolA-like 2 (E. coli)	1.63475	1434544_at
A630081D01Rik	RIKEN cDNA A630081D01 gene	1.63519	1457759_at
D12Ertd647e	DNA segment, Chr 12, ERATO Doi 647, expressed	1.63531	1452956_a_at
Rcl1	RNA terminal phosphate cyclase-like 1	1.63534	1416730_at
Rchy1	ring finger and CHY zinc finger domain containing 1	1.63536	1432144_a_at
Phf8	PHD finger protein 8	1.63543	1460398_at
Tnk2	tyrosine kinase, non-receptor, 2	1.63561	1448298_at
Leprot	leptin receptor overlapping transcript	1.6359	1451350_a_at
Kif24	kinesin family member 24	1.63595	1446507_at
Rnmtl1	RNA methyltransferase like 1	1.63603	1428766_at
Galk1	galactokinase 1	1.63642	1417177_at
Btg2	B-cell translocation gene 2, anti-proliferative	1.6367	1416250_at
Arid4b	AT rich interactive domain 4B (RBP1-like)	1.637	1451847_s_at
Tmem179b	transmembrane protein 179B	1.63764	1449842_at
Atp8a1	ATPase, aminophospholipid transporter (APLT), class I, type 8A, member 1	1.63781	1433827_at
Lipa	lysosomal acid lipase A	1.63853	1423141_at
Mthfd2	methylenetetrahydrofolate dehydrogenase (NAD+ dependent), methenyltetrahydrofolate cyclohydrolase	1.63868	1419253_at
AI645535	expressed sequence AI645535	1.63951	1460080_at
Aurkb	aurora kinase B	1.64056	1451246_s_at
Cherp	calcium homeostasis endoplasmic reticulum protein	1.64095	1451896_a_at
Rab14	RAB14, member RAS oncogene family	1.64143	1419243_at
Rfx1	regulatory factor X, 1 (influences HLA class II expression)	1.6419	1436059_at
Sf3b3	splicing factor 3b, subunit 3	1.64202	1415985_at
Ddx46	DEAD (Asp-Glu-Ala-Asp) box polypeptide 46	1.64243	1424569_at
6720458F09Rik	RIKEN cDNA 6720458F09 gene	1.64268	1433962_at
2310061I04Rik	RIKEN cDNA 2310061I04 gene	1.64268	1434155_a_at
Mrpl18	mitochondrial ribosomal protein L18	1.64303	1448373_at
Timeless	timeless homolog (Drosophila)	1.64305	1417586_at
Hif3a	hypoxia inducible factor 3, alpha subunit	1.64307	1425428_at
Lmo4	LIM domain only 4	1.64348	1420981_a_at
Rprd2	Regulation of nuclear pre-mRNA domain containing 2	1.64414	1434817_s_at
Cdk9	cyclin-dependent kinase 9 (CDC2-related kinase)	1.64461	1417269_at
Orc2l	origin recognition complex, subunit 2-like (S. cerevisiae)	1.64477	1418226_at
Ptpn14	protein tyrosine phosphatase, non-receptor type 14	1.64536	1421499_a_at
Dnajc3	DnaJ (Hsp40) homolog, subfamily C, member 3	1.64563	1449372_at
Ksr1	kinase suppressor of ras 1	1.64629	1419823_s_at
Nudcd2	NudC domain containing 2	1.64633	1449140_at
Hmmr	hyaluronan mediated motility receptor (RHAMM)	1.64666	1429871_at
Prkrip1	Prkr interacting protein 1 (IL11 inducible)	1.6469	1417425_at
Npal3	NIPA-like domain containing 3	1.64692	1434315_at
Gtpbp3	GTP binding protein 3	1.64707	1457975_at
Ints2	integrator complex subunit 2	1.6473	1429461_at
Nampt	nicotinamide phosphoribosyltransferase	1.6478	1417190_at
Psme4	proteasome (prosome, macropain) activator subunit 4	1.64781	1452211_at
Pip4k2a	phosphatidylinositol-5-phosphate 4-kinase, type II, alpha	1.64788	1419280_at
Gpn2	GPN-loop GTPase 2	1.64807	1448836_s_at
Pabpc4	poly A binding protein, cytoplasmic 4	1.64958	1451296_x_at
Erap1	endoplasmic reticulum aminopeptidase 1	1.64983	1439068_at
Entpd7	ectonucleoside triphosphate diphosphohydrolase 7	1.65056	1435625_at
0610011L14Rik	RIKEN cDNA 0610011L14 gene	1.65085	1426017_a_at
Rdh11	retinol dehydrogenase 11	1.65134	1449209_a_at
Odc1	ornithine decarboxylase, structural 1	1.65165	1427364_a_at
Zfp91	zinc finger protein 91	1.65198	1426327_s_at
Nudcd2	NudC domain containing 2	1.65207	1418566_s_at
Ranbp1	RAN binding protein 1	1.65339	1422547_at
Umps	uridine monophosphate synthetase	1.65357	1455832_a_at
Khdrbs1	KH domain containing, RNA binding, signal transduction associated 1	1.65445	1434541_x_at
Pprc1	peroxisome proliferative activated receptor, gamma, coactivator-related 1	1.65567	1426381_at
Irf7	interferon regulatory factor 7	1.65568	1417244_a_at
2610507B11Rik	RIKEN cDNA 2610507B11 gene	1.65629	1455905_at
2810405J04Rik	RIKEN cDNA 2810405J04 gene	1.65801	1416445_at
Rpp30	ribonuclease P/MRP 30 subunit (human)	1.6582	1447970_at
Sec23b	SEC23B (S. cerevisiae)	1.65833	1416059_at
Mtpn	myotrophin	1.65884	1420472_at
Taf2	TAF2 RNA polymerase II, TATA box binding protein (TBP)-associated factor	1.65983	1434238_at
Ube2d3	ubiquitin-conjugating enzyme E2D 3 (UBC4/5 homolog, yeast)	1.66032	1423113_a_at
Rad17	RAD17 homolog (S. pombe)	1.66092	1448762_at
Nedd8	neural precursor cell expressed, developmentally down-regulated gene 8	1.66098	1423715_a_at
Gda	guanine deaminase	1.66132	1435749_at
Dlst	dihydrolipoamide S-succinyltransferase (E2 component of 2-oxo-glutarate complex)	1.66148	1423710_at
Tm7sf3	transmembrane 7 superfamily member 3	1.66149	1438504_x_at
1110020G09Rik	RIKEN cDNA 1110020G09 gene	1.66186	1453422_a_at
Mrpl9	mitochondrial ribosomal protein L9	1.66235	1427297_at
Ppm1e	protein phosphatase 1E (PP2C domain containing)	1.66263	1434990_at
6030443O07Rik	RIKEN cDNA 6030443O07 gene	1.66275	1438233_at
2610030H06Rik	RIKEN cDNA 2610030H06 gene	1.66321	1434233_at
St6galnac4	ST6 (alpha-N-acetyl-neuraminyl-2,3-beta-galactosyl-1,3)-N-acetylgalactosaminide alpha-2,6-sialyltransferase 4	1.6635	1418074_at
Tufm	Tu translation elongation factor, mitochondrial	1.6637	1433952_at
Snx9	sorting nexin 9	1.66407	1423077_at
2310003F16Rik	RIKEN cDNA 2310003F16 gene	1.66447	1423206_s_at
Metap2	methionine aminopeptidase 2	1.66558	1423610_at
Eif4ebp1	eukaryotic translation initiation factor 4E binding protein 1	1.66575	1417562_at
Slc16a10	solute carrier family 16 (monocarboxylic acid transporters), member 10	1.666	1434592_at
Oat	ornithine aminotransferase	1.66695	1416452_at
Usp7	ubiquitin specific peptidase 7	1.66701	1434371_x_at
Rap2b	RAP2B, member of RAS oncogene family	1.66738	1448885_at
D330038O06Rik	RIKEN cDNA D330038O06 gene	1.66739	1435491_at
Lpin2	lipin 2	1.66745	1452837_at
Nup50	nucleoporin 50	1.66872	1428328_at
Ccnb1	cyclin B1	1.66872	1419943_s_at
Wdr74	WD repeat domain 74	1.66972	1416890_at
Tnk2	tyrosine kinase, non-receptor, 2	1.66982	1448297_a_at
Acp1	acid phosphatase 1, soluble	1.66993	1450721_at
Prrc1	proline-rich coiled-coil 1	1.66997	1424058_at
Dnajc18	DnaJ (Hsp40) homolog, subfamily C, member 18	1.6704	1425076_at
Pmf1	polyamine-modulated factor 1	1.67193	1438173_x_at
Slc39a4	solute carrier family 39 (zinc transporter), member 4	1.67193	1451139_at
Eif1ad	eukaryotic translation initiation factor 1A domain containing	1.67199	1428542_at
Exosc9	exosome component 9	1.67259	1418462_at
Ipmk	inositol polyphosphate multikinase	1.67292	1436215_at
Coq10b	coenzyme Q10 homolog B (S. cerevisiae)	1.67301	1460510_a_at
Mmd	monocyte to macrophage differentiation-associated	1.67311	1435645_at
Rpl36al	ribosomal protein L36a-like	1.6733	1448697_s_at
Atp6v0a2	ATPase, H+ transporting, lysosomal V0 subunit A2	1.67465	1449870_a_at
Adk	adenosine kinase	1.67466	1449641_at
Ube2s	ubiquitin-conjugating enzyme E2S	1.67509	1416726_s_at
Gfm2	G elongation factor, mitochondrial 2	1.67532	1426590_at
Tnfrsf14	tumor necrosis factor receptor superfamily, member 14 (herpesvirus entry mediator)	1.67533	1452425_at
1110005A03Rik	RIKEN cDNA 1110005A03 gene	1.6754	1453485_s_at
Tapbpl	TAP binding protein-like	1.67662	1451544_at
Dhx30	DEAH (Asp-Glu-Ala-His) box polypeptide 30	1.67733	1416140_a_at
Ppp1r7	protein phosphatase 1, regulatory (inhibitor) subunit 7	1.6774	1417919_at
Ogdh	oxoglutarate dehydrogenase (lipoamide)	1.67745	1445632_at
Nup50	nucleoporin 50	1.6776	1450722_at
Qtrt1	queuine tRNA-ribosyltransferase 1	1.67795	1450630_at
Cks2	CDC28 protein kinase regulatory subunit 2	1.67831	1417458_s_at
Senp2	SUMO/sentrin specific peptidase 2	1.67881	1425466_at
Nln	neurolysin (metallopeptidase M3 family)	1.67892	1424981_at
A730054J21Rik	RIKEN cDNA A730054J21 gene	1.67963	1438531_at
Ints9	integrator complex subunit 9	1.67984	1436896_at
Ccl17	chemokine (C-C motif) ligand 17	1.67991	1419413_at
Reep6	receptor accessory protein 6	1.68023	1430128_a_at
Ttpal	tocopherol (alpha) transfer protein-like	1.68033	1428457_at
Pklr	pyruvate kinase liver and red blood cell	1.68102	1421258_a_at
Pds5b	PDS5, regulator of cohesion maintenance, homolog B (S. cerevisiae)	1.68106	1435242_at
Ctdp1	CTD (carboxy-terminal domain, RNA polymerase II, polypeptide A) phosphatase, subunit 1	1.68112	1452697_at
Kars	lysyl-tRNA synthetase	1.68118	1416068_at
B4galnt1	beta-1,4-N-acetyl-galactosaminyl transferase 1	1.68191	1418655_at
Necap2	NECAP endocytosis associated 2	1.68211	1418961_at
Plk1	polo-like kinase 1 (Drosophila)	1.68216	1448191_at
Foxk2	forkhead box K2	1.68221	1428353_at
Dffa	DNA fragmentation factor, alpha subunit	1.68314	1450885_at
Txnrd1	thioredoxin reductase 1	1.68413	1421529_a_at
A730089K16Rik	RIKEN cDNA A730089K16 gene	1.68421	1437263_at
Pdzd3	PDZ domain containing 3	1.68481	1449330_at
Commd7	COMM domain containing 7	1.68575	1426765_at
Vps53	vacuolar protein sorting 53 (yeast)	1.68652	1455644_at
Cggbp1	CGG triplet repeat binding protein 1	1.68665	1455658_at
Shkbp1	Sh3kbp1 binding protein 1	1.68713	1424174_at
Psmg2	proteasome (prosome, macropain) assembly chaperone 2	1.68863	1448212_at
Lyn	Yamaguchi sarcoma viral (v-yes-1) oncogene homolog	1.68884	1425598_a_at
App	amyloid beta (A4) precursor protein	1.68956	1420621_a_at
Nadk	NAD kinase	1.68977	1416249_at
Gyg	glycogenin	1.68978	1448429_at
Fkbp4	FK506 binding protein 4	1.69009	1416362_a_at
Atg2b	ATG2 autophagy related 2 homolog B (S. cerevisiae)	1.69044	1424702_a_at
Scp2	sterol carrier protein 2, liver	1.69065	1426219_at
Pigq	phosphatidylinositol glycan anchor biosynthesis, class Q	1.69102	1415946_at
Ddx24	DEAD (Asp-Glu-Ala-Asp) box polypeptide 24	1.69114	1415713_a_at
Mrps18b	mitochondrial ribosomal protein S18B	1.69122	1451164_a_at
Lpcat1	lysophosphatidylcholine acyltransferase 1	1.69155	1424460_s_at
Isg20	interferon-stimulated protein	1.69286	1419569_a_at
Srm	spermidine synthase	1.69287	1421260_a_at
Timm8a1	translocase of inner mitochondrial membrane 8 homolog a1 (yeast)	1.69325	1416345_at
Ftsj2	FtsJ homolog 2 (E. coli)	1.69335	1448969_at
2310047M10Rik	RIKEN cDNA 2310047M10 gene	1.6941	1428723_at
Tspan17	tetraspanin 17	1.69482	1455642_a_at
D16H22S680E	DNA segment, Chr 16, human D22S680E, expressed	1.69586	1448900_at
Ep400	E1A binding protein p400	1.69631	1447349_s_at
Nmnat3	nicotinamide nucleotide adenylyltransferase 3	1.69684	1424899_at
Rab6	RAB6, member RAS oncogene family	1.69692	1448304_a_at
Herc1	hect (homologous to the E6-AP (UBE3A) carboxyl terminus) domain and RCC1 (CHC1)-like domain (RLD) 1	1.69711	1440437_at
Adk	adenosine kinase	1.6981	1438292_x_at
Zfp36	zinc finger protein 36	1.70012	1452519_a_at
Zdhhc7	zinc finger, DHHC domain containing 7	1.70088	1416545_at
Tm9sf4	transmembrane 9 superfamily protein member 4	1.7017	1423204_at
Lrrc8c	leucine rich repeat containing 8 family, member C	1.70202	1455398_at
Tprkb	Tp53rk binding protein	1.70285	1424992_at
Nek2	NIMA (never in mitosis gene a)-related expressed kinase 2	1.70298	1437580_s_at
Mnat1	menage a trois 1	1.70316	1432177_a_at
Mtch1	mitochondrial carrier homolog 1 (C. elegans)	1.7034	1460718_s_at
Htra2	HtrA serine peptidase 2	1.70343	1460495_s_at
BC051142	cDNA sequence BC051142	1.70423	1437264_at
4933424B01Rik	RIKEN cDNA 4933424B01 gene	1.70555	1455076_a_at
Phf10	PHD finger protein 10	1.70585	1449085_at
BC024659	cDNA sequence BC024659	1.70643	1433986_at
4932415G12Rik	RIKEN cDNA 4932415G12 gene	1.70695	1428375_at
Tmem167	transmembrane protein 167	1.70723	1425780_a_at
Mars	methionine-tRNA synthetase	1.70824	1455951_at
Ppp2r5c	protein phosphatase 2, regulatory subunit B (B56), gamma isoform	1.70897	1434206_s_at
Pdia3	protein disulfide isomerase associated 3	1.71035	1423423_at
Hmbs	hydroxymethylbilane synthase	1.71042	1436930_x_at
Ralgps2	Ral GEF with PH domain and SH3 binding motif 2	1.71047	1431704_a_at
Rgs12	regulator of G-protein signaling 12	1.71121	1453129_a_at
Mrpl17	mitochondrial ribosomal protein L17	1.71159	1450866_a_at
Eif6	eukaryotic translation initiation factor 6	1.71212	1427578_a_at
Ralgps2	Ral GEF with PH domain and SH3 binding motif 2	1.71254	1417230_at
Tgs1	trimethylguanosine synthase homolog (S. cerevisiae)	1.71269	1450401_at
Nktr	natural killer tumor recognition sequence	1.7127	1423249_at
1700052N19Rik	RIKEN cDNA 1700052N19 gene	1.71296	1454879_s_at
Pcnt	pericentrin (kendrin)	1.71335	1416073_a_at
Cdkn2aipnl	CDKN2A interacting protein N-terminal like	1.7143	1452200_at
Usp24	ubiquitin specific peptidase 24	1.71542	1448013_at
Ilf2	interleukin enhancer binding factor 2	1.71546	1417949_at
Sphk1	sphingosine kinase 1	1.71592	1420566_at
Aqp9	aquaporin 9	1.71615	1424011_at
EG627232	predicted gene, EG627232	1.7166	1448758_at
Phtf2	putative homeodomain transcription factor 2	1.71671	1444559_at
Ccne1	cyclin E1	1.71744	1441910_x_at
Cnot8	CCR4-NOT transcription complex, subunit 8	1.71774	1421135_a_at
Ube2l3	ubiquitin-conjugating enzyme E2L 3	1.71818	1448879_at
Isyna1	myo-inositol 1-phosphate synthase A1	1.71835	1415977_at
9430020K01Rik	RIKEN cDNA 9430020K01 gene	1.71886	1428535_at
Eprs	glutamyl-prolyl-tRNA synthetase	1.71928	1426713_s_at
Asph	aspartate-beta-hydroxylase	1.71938	1426015_s_at
Ctps	cytidine 5@#$%&-triphosphate synthase	1.71963	1416563_at
Tbrg4	transforming growth factor beta regulated gene 4	1.71983	1442793_s_at
Slc22a23	solute carrier family 22, member 23	1.7202	1453004_at
Fbxw2	F-box and WD-40 domain protein 2	1.72058	1423442_a_at
Sfxn1	sideroflexin 1	1.72061	1417560_at
Gpatch8	G patch domain containing 8	1.72096	1424666_at
Rpn1	ribophorin I	1.72101	1456438_x_at
BC028789	cDNA sequence BC028789	1.7211	1460064_at
Bclaf1	BCL2-associated transcription factor 1	1.72128	1438089_a_at
Tnpo1	transportin 1	1.72132	1455043_at
Gclm	glutamate-cysteine ligase , modifier subunit	1.72167	1418627_at
ENSMUSG00000074747	predicted gene, ENSMUSG00000074747	1.72177	1428128_at
Tpst1	protein-tyrosine sulfotransferase 1	1.72182	1421733_a_at
Memo1	mediator of cell motility 1	1.72189	1449821_a_at
D6Wsu176e	DNA segment, Chr 6, Wayne State University 176, expressed	1.72202	1417953_at
1500005A01Rik	RIKEN cDNA 1500005A01 gene	1.72276	1418474_at
Sec13	SEC13 homolog (S. cerevisiae)	1.72352	1416241_at
Trappc10	trafficking protein particle complex 10	1.72403	1435430_at
Mtr	5-methyltetrahydrofolate-homocysteine methyltransferase	1.72405	1458532_at
1110037F02Rik	RIKEN cDNA 1110037F02 gene	1.72434	1427906_at
Ank1	ankyrin 1, erythroid	1.72487	1425677_a_at
Gak	cyclin G associated kinase	1.72517	1426703_at
Afg3l2	AFG3(ATPase family gene 3)-like 2 (yeast)	1.72536	1427206_at
Dad1	defender against cell death 1	1.72538	1418528_a_at
Stat1	signal transducer and activator of transcription 1	1.72562	1450034_at
Bclaf1	BCL2-associated transcription factor 1	1.72595	1436023_at
Icmt	isoprenylcysteine carboxyl methyltransferase	1.7268	1426500_at
Ints5	integrator complex subunit 5	1.72775	1434012_at
Mum1	melanoma associated antigen (mutated) 1	1.728	1416536_at
Dnajc21	DnaJ (Hsp40) homolog, subfamily C, member 21	1.72826	1460711_at
Nfu1	NFU1 iron-sulfur cluster scaffold homolog (S. cerevisiae)	1.72855	1418228_at
Spire1	spire homolog 1 (Drosophila)	1.72907	1459548_at
Spag7	sperm associated antigen 7	1.72927	1433940_at
Opa3	optic atrophy 3 (human)	1.72953	1447724_x_at
Ap1b1	adaptor protein complex AP-1, beta 1 subunit	1.72962	1416279_at
Nubp1	nucleotide binding protein 1	1.72968	1430778_a_at
Pno1	partner of NOB1 homolog (S. cerevisiae)	1.72995	1450735_at
Arih1	ariadne ubiquitin-conjugating enzyme E2 binding protein homolog 1 (Drosophila)	1.73071	1427188_at
Yif1a	Yip1 interacting factor homolog A (S. cerevisiae)	1.73092	1423940_at
Pck2	phosphoenolpyruvate carboxykinase 2 (mitochondrial)	1.73137	1425615_a_at
Tex2	testis expressed gene 2	1.73188	1452213_at
Vps18	vacuolar protein sorting 18 (yeast)	1.73201	1427304_at
Dhrs4	dehydrogenase/reductase (SDR family) member 4	1.73244	1451559_a_at
Trmt1	TRM1 tRNA methyltransferase 1 homolog (S. cerevisiae)	1.73268	1451249_at
Slc25a44	solute carrier family 25, member 44	1.73412	1436909_at
Tuft1	tuftelin 1	1.73446	1416689_at
Wrn	Werner syndrome homolog (human)	1.73464	1450163_a_at
4631426J05Rik	RIKEN cDNA 4631426J05 gene	1.73467	1452092_at
Ifi202b	interferon activated gene 202B	1.7349	1421551_s_at
Timeless	timeless homolog (Drosophila)	1.73491	1417587_at
4632428N05Rik	RIKEN cDNA 4632428N05 gene	1.73548	1448407_at
Ddx39	DEAD (Asp-Glu-Ala-Asp) box polypeptide 39	1.73556	1423643_at
Bcl2l13	BCL2-like 13 (apoptosis facilitator)	1.73557	1429539_at
Pdha1	pyruvate dehydrogenase E1 alpha 1	1.73572	1449137_at
Arl2bp	ADP-ribosylation factor-like 2 binding protein	1.73636	1417112_at
Mapk9	mitogen-activated protein kinase 9	1.73656	1421877_at
Pgm1	phosphoglucomutase 1	1.73671	1453283_at
Shisa2	shisa homolog 2 (Xenopus laevis)	1.73687	1423851_a_at
Suds3	suppressor of defective silencing 3 homolog (S. cerevisiae)	1.73782	1427896_at
Bzw2	basic leucine zipper and W2 domains 2	1.73807	1423456_at
Tsn	translin	1.7381	1448515_at
Rpain	RPA interacting protein	1.73837	1428828_at
Alms1	Alstrom syndrome 1 homolog (human)	1.73933	1456950_at
Urod	uroporphyrinogen decarboxylase	1.73947	1417206_at
Rexo2	REX2, RNA exonuclease 2 homolog (S. cerevisiae)	1.73985	1451259_at
Lpin2	lipin 2	1.74129	1460290_at
Hspe1	heat shock protein 1 (chaperonin 10)	1.74179	1450668_s_at
Grb2	growth factor receptor bound protein 2	1.7419	1449111_a_at
Idh1	isocitrate dehydrogenase 1 (NADP+), soluble	1.74201	1422433_s_at
Atox1	ATX1 (antioxidant protein 1) homolog 1 (yeast)	1.74219	1415760_s_at
Gba	glucosidase, beta, acid	1.74236	1450099_a_at
Mbc2	membrane bound C2 domain containing protein	1.7425	1451099_at
Ddit4	DNA-damage-inducible transcript 4	1.74266	1428306_at
Ppm1b	protein phosphatase 1B, magnesium dependent, beta isoform	1.74319	1425330_a_at
Cct2	chaperonin containing Tcp1, subunit 2 (beta)	1.7433	1416037_a_at
Eif2ak1	eukaryotic translation initiation factor 2 alpha kinase 1	1.74366	1421900_at
Cndp2	CNDP dipeptidase 2 (metallopeptidase M20 family)	1.74416	1460177_at
Tmem168	transmembrane protein 168	1.74432	1423822_a_at
Gmfb	glia maturation factor, beta	1.74448	1448570_at
Rexo4	REX4, RNA exonuclease 4 homolog (S. cerevisiae)	1.74521	1434114_at
Mcm6	minichromosome maintenance deficient 6 (MIS5 homolog, S. pombe) (S. cerevisiae)	1.74558	1416251_at
2010316F05Rik	RIKEN cDNA 2010316F05 gene	1.74577	1460456_at
Smc1a	structural maintenance of chromosomes 1A	1.74602	1417831_at
Opa3	optic atrophy 3 (human)	1.74662	1434886_at
Psmg2	proteasome (prosome, macropain) assembly chaperone 2	1.74671	1425373_a_at
Hk3	hexokinase 3	1.74706	1435490_at
Myo7a	myosin VIIa	1.74863	1421385_a_at
Mrpl35	mitochondrial ribosomal protein L35	1.74881	1419363_a_at
Rassf4	Ras association (RalGDS/AF-6) domain family member 4	1.74957	1444009_at
Supt16h	suppressor of Ty 16 homolog (S. cerevisiae)	1.74995	1419741_at
Mdm4	transformed mouse 3T3 cell double minute 4	1.74998	1460542_s_at
Selenbp2	selenium binding protein 2	1.75018	1417580_s_at
Mapk1	mitogen-activated protein kinase 1	1.75041	1419568_at
AI450540	expressed sequence AI450540	1.7506	1423876_at
Eif4b	eukaryotic translation initiation factor 4B	1.75102	1426378_at
Farsb	phenylalanyl-tRNA synthetase, beta subunit	1.75109	1430986_at
Dusp19	dual specificity phosphatase 19	1.7511	1418038_s_at
Pwp1	PWP1 homolog (S. cerevisiae)	1.75125	1454142_a_at
1700021F05Rik	RIKEN cDNA 1700021F05 gene	1.75138	1421019_at
2310056P07Rik	RIKEN cDNA 2310056P07 gene	1.75368	1451385_at
Sh3d19	SH3 domain protein D19	1.75532	1449084_s_at
Pcbp1	poly(rC) binding protein 1	1.75581	1448642_at
Slc35a1	solute carrier family 35 (CMP-sialic acid transporter), member 1	1.75588	1417539_at
Lrrc47	leucine rich repeat containing 47	1.75766	1428451_at
Rbms1	RNA binding motif, single stranded interacting protein 1	1.75808	1418703_at
Slco3a1	solute carrier organic anion transporter family, member 3a1	1.75826	1448918_at
Slc22a3	solute carrier family 22 (organic cation transporter), member 3	1.75878	1420444_at
Nol9	nucleolar protein 9	1.75897	1455330_at
Dock9	dedicator of cytokinesis 9	1.75987	1444028_s_at
Nuf2	NUF2, NDC80 kinetochore complex component, homolog (S. cerevisiae)	1.76001	1430811_a_at
Hadhb	hydroxyacyl-Coenzyme A dehydrogenase/3-ketoacyl-Coenzyme A thiolase/enoyl-Coenzyme A hydratase (trifunctional protein), beta subunit	1.76086	1426522_at
Mrpl53	mitochondrial ribosomal protein L53	1.76104	1451178_at
Kcnn4	potassium intermediate/small conductance calcium-activated channel, subfamily N, member 4	1.7611	1421038_a_at
Tuba4a	tubulin, alpha 4A	1.76158	1417374_at
Tmpo	thymopoietin	1.76182	1428976_at
Sh3bgrl	SH3-binding domain glutamic acid-rich protein like	1.76195	1421871_at
Ehd1	EH-domain containing 1	1.76296	1416011_x_at
Runx1	runt related transcription factor 1	1.76339	1422864_at
Slc20a1	solute carrier family 20, member 1	1.76378	1448568_a_at
Uhrf1bp1	UHRF1 (ICBP90) binding protein 1	1.76426	1439482_at
Ttll12	tubulin tyrosine ligase-like family, member 12	1.76454	1437242_at
1300018I05Rik	RIKEN cDNA 1300018I05 gene	1.76516	1451082_at
2310035C23Rik	RIKEN cDNA 2310035C23 gene	1.76529	1454707_at
H2-DMa	histocompatibility 2, class II, locus DMa	1.7667	1422527_at
Cdc25c	cell division cycle 25 homolog C (S. pombe)	1.7673	1422252_a_at
Nedd4	neural precursor cell expressed, developmentally down-regulated 4	1.76735	1451109_a_at
2610014I16Rik	RIKEN cDNA 2610014I16 gene	1.76749	1455135_at
Arf4	ADP-ribosylation factor 4	1.7679	1423053_at
Lrrc59	leucine rich repeat containing 59	1.76829	1416234_at
1110018G07Rik	RIKEN cDNA 1110018G07 gene	1.76861	1433767_at
Ppp1r12a	protein phosphatase 1, regulatory (inhibitor) subunit 12A	1.76928	1429487_at
Mbp	myelin basic protein	1.76955	1425263_a_at
AB124611	cDNA sequence AB124611	1.77009	1438475_at
EG667823	predicted gene, EG667823	1.77097	1442693_at
Pnkp	polynucleotide kinase 3@#$%&- phosphatase	1.77109	1416378_at
Rdx	radixin	1.77117	1416180_a_at
Glo1	glyoxalase 1	1.77123	1424109_a_at
Rps15a	ribosomal protein S15a	1.77183	1453467_s_at
Rad51ap1	RAD51 associated protein 1	1.77214	1417939_at
Endod1	endonuclease domain containing 1	1.77279	1426543_x_at
Gfi1b	growth factor independent 1B	1.77445	1420399_at
Chd2	chromodomain helicase DNA binding protein 2	1.77505	1445843_at
Plvap	plasmalemma vesicle associated protein	1.77547	1418090_at
Cpsf6	cleavage and polyadenylation specific factor 6	1.77548	1428233_at
Mylpf	myosin light chain, phosphorylatable, fast skeletal muscle	1.7761	1448371_at
Nadk	NAD kinase	1.77709	1416248_at
Hsp90ab1	heat shock protein 90kDa alpha (cytosolic), class B member 1	1.77741	1416364_at
Eif5	eukaryotic translation initiation factor 5	1.77769	1454663_at
Specc1	sperm antigen with calponin homology and coiled-coil domains 1	1.77773	1458440_at
1810034K20Rik	RIKEN cDNA 1810034K20 gene	1.77809	1428337_at
Nolc1	nucleolar and coiled-body phosphoprotein 1	1.77811	1428870_at
Plrg1	pleiotropic regulator 1, PRL1 homolog (Arabidopsis)	1.77835	1448282_at
Kif26b	kinesin family member 26B	1.77858	1440990_at
Pdlim5	PDZ and LIM domain 5	1.77898	1427475_a_at
Ssrp1	structure specific recognition protein 1	1.7794	1426788_a_at
Ccdc32	coiled-coil domain containing 32	1.78075	1460558_at
9530085L11Rik	RIKEN cDNA 9530085L11 gene	1.78086	1446355_at
Hnrnpa1	heterogeneous nuclear ribonucleoprotein A1	1.78088	1430019_a_at
Mtf1	metal response element binding transcription factor 1	1.78132	1440414_at
Ppat	phosphoribosyl pyrophosphate amidotransferase	1.78198	1452831_s_at
Smek1	SMEK homolog 1, suppressor of mek1 (Dictyostelium)	1.78212	1435742_at
Slc25a5	solute carrier family 25 (mitochondrial carrier, adenine nucleotide translocator), member 5	1.78265	1434801_x_at
Hspa9	heat shock protein 9	1.78282	1418504_at
Gabpb2	GA repeat binding protein, beta 2	1.78309	1455110_at
Atp6v1f	ATPase, H+ transporting, lysosomal V1 subunit F	1.78319	1423993_at
Il12rb1	interleukin 12 receptor, beta 1	1.78403	1418166_at
Mthfd1	methylenetetrahydrofolate dehydrogenase (NADP+ dependent), methenyltetrahydrofolate cyclohydrolase, formyltetrahydrofolate synthase	1.78421	1415916_a_at
Plod3	procollagen-lysine, 2-oxoglutarate 5-dioxygenase 3	1.78423	1415901_at
Ebp	phenylalkylamine Ca2+ antagonist (emopamil) binding protein	1.785	1416667_at
Anapc10	anaphase promoting complex subunit 10	1.78554	1429375_at
Fxr1	fragile X mental retardation gene 1, autosomal homolog	1.78596	1452247_at
Chsy1	chondroitin sulfate synthase 1	1.78746	1434316_at
Egln1	EGL nine homolog 1 (C. elegans)	1.78748	1451110_at
Wbp7	WW domain binding protein 7	1.78765	1452916_at
Ubl4	ubiquitin-like 4	1.78792	1424538_at
Uck2	uridine-cytidine kinase 2	1.788	1439740_s_at
Slc16a1	solute carrier family 16 (monocarboxylic acid transporters), member 1	1.78831	1415802_at
Scd2	stearoyl-Coenzyme A desaturase 2	1.78852	1415824_at
Eif2b4	eukaryotic translation initiation factor 2B, subunit 4 delta	1.78864	1449940_a_at
Shisa2	shisa homolog 2 (Xenopus laevis)	1.7887	1423852_at
Eif4a1	eukaryotic translation initiation factor 4A1	1.78894	1427058_at
Rnf26	ring finger protein 26	1.78908	1423650_at
Trim27	tripartite motif-containing 27	1.78916	1448101_s_at
Polr3e	polymerase (RNA) III (DNA directed) polypeptide E	1.78921	1429456_a_at
Eif3f	eukaryotic translation initiation factor 3, subunit F	1.78926	1427021_s_at
Pmm1	phosphomannomutase 1	1.78935	1424167_a_at
Glrx2	glutaredoxin 2 (thioltransferase)	1.79009	1422998_a_at
Gapvd1	GTPase activating protein and VPS9 domains 1	1.79086	1453146_at
Myeov2	myeloma overexpressed 2	1.79091	1433517_at
Ltb4r1	leukotriene B4 receptor 1	1.79122	1420407_at
Larp4	La ribonucleoprotein domain family, member 4	1.79134	1455102_at
Ppp1r15b	protein phosphatase 1, regulatory (inhibitor) subunit 15b	1.79202	1426798_a_at
Plxnc1	plexin C1	1.79333	1450905_at
Lsm11	U7 snRNP-specific Sm-like protein LSM11	1.79406	1439578_at
Pvrl2	poliovirus receptor-related 2	1.79413	1424456_at
Muted	muted	1.7949	1448979_at
Opa1	optic atrophy 1 homolog (human)	1.79512	1449214_a_at
Arl2bp	ADP-ribosylation factor-like 2 binding protein	1.79516	1429859_a_at
Etf1	eukaryotic translation termination factor 1	1.79596	1420024_s_at
Ddb1	damage specific DNA binding protein 1	1.79621	1415735_at
Rnase4	ribonuclease, RNase A family 4	1.79623	1422603_at
Fars2	phenylalanine-tRNA synthetase 2 (mitochondrial)	1.79633	1431354_a_at
Lap3	leucine aminopeptidase 3	1.79654	1450860_at
Ramp1	receptor (calcitonin) activity modifying protein 1	1.79685	1417481_at
Nav2	neuron navigator 2	1.7985	1442467_at
Arhgap19	Rho GTPase activating protein 19	1.79856	1434911_s_at
Cog4	component of oligomeric golgi complex 4	1.79892	1416993_at
Pde2a	phosphodiesterase 2A, cGMP-stimulated	1.80029	1447707_s_at
Hopx	HOP homeobox	1.8006	1428662_a_at
2610034M16Rik	RIKEN cDNA 2610034M16 gene	1.80146	1425408_a_at
Taok3	TAO kinase 3	1.80176	1435964_a_at
Psen2	presenilin 2	1.80235	1425869_a_at
LOC100038887	hypothetical protein LOC100038887	1.80245	1423517_at
Tbc1d2b	TBC1 domain family, member 2B	1.80279	1428508_at
Zfp828	zinc finger protein 828	1.80309	1454679_at
BC039210	cDNA sequence BC039210	1.80427	1455157_a_at
Usp24	ubiquitin specific peptidase 24	1.80429	1441018_at
Atp5o	ATP synthase, H+ transporting, mitochondrial F1 complex, O subunit	1.8051	1416278_a_at
D13Wsu177e	DNA segment, Chr 13, Wayne State University 177, expressed	1.80513	1424620_at
Alas1	aminolevulinic acid synthase 1	1.80535	1455282_x_at
Erdr1	erythroid differentiation regulator 1	1.8055	1439200_x_at
U2af1	U2 small nuclear ribonucleoprotein auxiliary factor (U2AF) 1	1.80591	1422509_at
Mecr	mitochondrial trans-2-enoyl-CoA reductase	1.80623	1417097_at
Rpo1-3	RNA polymerase 1-3	1.80724	1448287_at
Isca1	iron-sulfur cluster assembly 1 homolog (S. cerevisiae)	1.80805	1423652_at
Txndc17	thioredoxin domain containing 17	1.80906	1423034_at
Sf1	splicing factor 1	1.80954	1423751_at
Aaas	achalasia, adrenocortical insufficiency, alacrimia	1.80997	1451377_a_at
Rpo1-4	RNA polymerase 1-4	1.81094	1460215_at
Acaa2	acetyl-Coenzyme A acyltransferase 2 (mitochondrial 3-oxoacyl-Coenzyme A thiolase)	1.81108	1428145_at
St3gal2	ST3 beta-galactoside alpha-2,3-sialyltransferase 2	1.81116	1421891_at
Podxl	podocalyxin-like	1.8113	1448688_at
Heatr1	HEAT repeat containing 1	1.81139	1424522_at
Copg2	coatomer protein complex, subunit gamma 2	1.81201	1448761_a_at
Wdr73	WD repeat domain 73	1.81323	1428677_at
4631426J05Rik	RIKEN cDNA 4631426J05 gene	1.81425	1426514_at
Clasp1	CLIP associating protein 1	1.81508	1460102_at
Ciapin1	cytokine induced apoptosis inhibitor 1	1.81512	1415910_s_at
Pon2	paraoxonase 2	1.81516	1450686_at
Tapbp	TAP binding protein	1.81525	1421812_at
Pgs1	phosphatidylglycerophosphate synthase 1	1.81535	1455229_x_at
Uhrf1bp1l	UHRF1 (ICBP90) binding protein 1-like	1.81541	1451276_at
Gga2	golgi associated, gamma adaptin ear containing, ARF binding protein 2	1.81696	1428141_at
Nup54	nucleoporin 54	1.81697	1432539_a_at
Slc38a1	solute carrier family 38, member 1	1.81749	1415903_at
Taok3	TAO kinase 3	1.81777	1444881_at
0610007L01Rik	RIKEN cDNA 0610007L01 gene	1.81787	1433900_at
Asb1	ankyrin repeat and SOCS box-containing 1	1.81802	1436208_at
AI661323	expressed sequence AI661323	1.82155	1459692_at
Dda1	DET1 and DDB1 associated 1	1.82162	1429038_at
Cdca4	cell division cycle associated 4	1.82192	1423683_at
Mrpl45	mitochondrial ribosomal protein L45	1.82284	1423492_at
Aen	apoptosis enhancing nuclease	1.82326	1437373_at
Arrb1	arrestin, beta 1	1.82346	1460444_at
Ubfd1	ubiquitin family domain containing 1	1.82374	1448968_at
Pik3cb	phosphatidylinositol 3-kinase, catalytic, beta polypeptide	1.8239	1453069_at
Kif22	kinesin family member 22	1.82419	1423813_at
H2afx	H2A histone family, member X	1.8244	1416746_at
Twf2	twinfilin, actin-binding protein, homolog 2 (Drosophila)	1.82507	1431292_a_at
Acbd3	acyl-Coenzyme A binding domain containing 3	1.82511	1456316_a_at
Zkscan3	zinc finger with KRAB and SCAN domains 3	1.82561	1437892_at
1500032L24Rik	RIKEN cDNA 1500032L24 gene	1.82605	1452584_at
Kpna3	karyopherin (importin) alpha 3	1.82633	1421828_at
Ppp2cb	protein phosphatase 2 (formerly 2A), catalytic subunit, beta isoform	1.82707	1421823_a_at
Uck2	uridine-cytidine kinase 2	1.82708	1448604_at
Nup107	nucleoporin 107	1.82712	1426751_s_at
Casc5	cancer susceptibility candidate 5	1.82743	1430193_at
Exosc3	exosome component 3	1.82758	1431502_a_at
Ugcg	UDP-glucose ceramide glucosyltransferase	1.82813	1439863_at
Sar1a	SAR1 gene homolog A (S. cerevisiae)	1.829	1423720_a_at
Ccng1	cyclin G1	1.82902	1450016_at
Mettl8	methyltransferase like 8	1.82944	1451141_at
Lpcat3	lysophosphatidylcholine acyltransferase 3	1.82958	1423960_at
Ascc3	activating signal cointegrator 1 complex subunit 3	1.8297	1457900_at
Qdpr	quinoid dihydropteridine reductase	1.83002	1423664_at
Mmp14	matrix metallopeptidase 14 (membrane-inserted)	1.83034	1448383_at
Mrpl12	mitochondrial ribosomal protein L12	1.83041	1452048_at
Mrps28	mitochondrial ribosomal protein S28	1.8319	1452585_at
Cyba	cytochrome b-245, alpha polypeptide	1.83229	1454268_a_at
Whsc1l1	Wolf-Hirschhorn syndrome candidate 1-like 1 (human)	1.83312	1457793_a_at
Exosc6	exosome component 6	1.83328	1435544_at
Laptm4a	lysosomal-associated protein transmembrane 4A	1.83359	1423368_at
Il10rb	interleukin 10 receptor, beta	1.83413	1419455_at
Gpsm2	G-protein signalling modulator 2 (AGS3-like, C. elegans)	1.83542	1424895_at
Prkar2b	protein kinase, cAMP dependent regulatory, type II beta	1.83545	1438664_at
Myo1d	myosin ID	1.8372	1435463_s_at
Mapk8	mitogen-activated protein kinase 8	1.83726	1457936_at
Alg8	asparagine-linked glycosylation 8 homolog (yeast, alpha-1,3-glucosyltransferase)	1.83878	1455887_at
Tmem192	transmembrane protein 192	1.8388	1424732_s_at
Aftph	aftiphilin	1.83913	1426861_at
Mobkl1b	MOB1, Mps One Binder kinase activator-like 1B (yeast)	1.8404	1424483_at
Nhlrc2	NHL repeat containing 2	1.84077	1453048_at
Nuak2	NUAK family, SNF1-like kinase, 2	1.84107	1429049_at
Pwp2	PWP2 periodic tryptophan protein homolog (yeast)	1.84113	1424193_at
Ubfd1	ubiquitin family domain containing 1	1.84132	1434078_at
Pip4k2a	phosphatidylinositol-5-phosphate 4-kinase, type II, alpha	1.84136	1419279_at
Baz1a	bromodomain adjacent to zinc finger domain 1A	1.8414	1447930_at
Api5	apoptosis inhibitor 5	1.84154	1439214_a_at
Rab4a	RAB4A, member RAS oncogene family	1.84268	1418341_at
Eif5b	eukaryotic translation initiation factor 5B	1.84289	1434605_at
Dmkn	dermokine	1.84409	1428781_at
Ndufs7	NADH dehydrogenase (ubiquinone) Fe-S protein 7	1.8441	1451312_at
Npm1	nucleophosmin 1	1.84461	1432416_a_at
Ndufv1	NADH dehydrogenase (ubiquinone) flavoprotein 1	1.84465	1415967_at
Tspo	translocator protein	1.84471	1416695_at
Dynll1	dynein light chain LC8-type 1	1.84689	1448682_at
Ccnf	cyclin F	1.84762	1422513_at
Txn2	thioredoxin 2	1.84784	1455640_a_at
100041294	predicted gene, 100041294	1.84787	1422418_s_at
Ccdc21	coiled-coil domain containing 21	1.84824	1451212_at
Stub1	STIP1 homology and U-Box containing protein 1	1.84845	1416580_a_at
Pcmt1	protein-L-isoaspartate (D-aspartate) O-methyltransferase 1	1.84898	1431085_a_at
Hdlbp	high density lipoprotein (HDL) binding protein	1.84904	1415988_at
Sin3a	transcriptional regulator, SIN3A (yeast)	1.84916	1419102_at
Larp1	La ribonucleoprotein domain family, member 1	1.84945	1428244_at
Rfc5	replication factor C (activator 1) 5	1.85119	1452917_at
Centd3	centaurin, delta 3	1.85178	1447407_at
Nomo1	nodal modulator 1	1.85211	1451169_at
9130011J15Rik	RIKEN cDNA 9130011J15 gene	1.85223	1426646_at
Calml4	calmodulin-like 4	1.85229	1424713_at
Vamp5	vesicle-associated membrane protein 5	1.8529	1430522_a_at
Tex9	testis expressed gene 9	1.85325	1444769_at
9530058B02Rik	RIKEN cDNA 9530058B02 gene	1.85344	1417212_at
Bax	BCL2-associated X protein	1.85411	1416837_at
Mms19	MMS19 (MET18 S. cerevisiae)	1.85464	1417967_at
A830021K08Rik	RIKEN cDNA A830021K08 gene	1.85734	1443979_at
Dyrk1a	dual-specificity tyrosine-(Y)-phosphorylation regulated kinase 1a	1.85738	1451977_at
Fech	ferrochelatase	1.8578	1449181_at
Tsnax	translin-associated factor X	1.85855	1423395_at
Rnf121	ring finger protein 121	1.85876	1426503_a_at
Rbbp4	retinoblastoma binding protein 4	1.85914	1454791_a_at
Bdh1	3-hydroxybutyrate dehydrogenase, type 1	1.85925	1452257_at
Dhps	deoxyhypusine synthase	1.85978	1434004_at
Acad9	acyl-Coenzyme A dehydrogenase family, member 9	1.86043	1453206_at
Psma6	proteasome (prosome, macropain) subunit, alpha type 6	1.86183	1416506_at
Trmt1	TRM1 tRNA methyltransferase 1 homolog (S. cerevisiae)	1.86368	1436494_x_at
Emg1	EMG1 nucleolar protein homolog (S. cerevisiae)	1.86455	1416393_at
Fxn	frataxin	1.86474	1427282_a_at
C80425	expressed sequence C80425	1.8657	1446914_at
Galnt2	UDP-N-acetyl-alpha-D-galactosamine:polypeptide N-acetylgalactosaminyltransferase 2	1.86574	1426756_at
Tpr	translocated promoter region	1.8662	1426948_at
Uck2	uridine-cytidine kinase 2	1.86708	1426909_at
0610007L01Rik	RIKEN cDNA 0610007L01 gene	1.86742	1428544_at
Acsl5	acyl-CoA synthetase long-chain family member 5	1.86751	1428082_at
Ncbp2	nuclear cap binding protein subunit 2	1.86773	1450847_at
Depdc6	DEP domain containing 6	1.86853	1451348_at
Prmt1	protein arginine N-methyltransferase 1	1.8692	1452787_a_at
Gnb4	guanine nucleotide binding protein (G protein), beta 4	1.86935	1419470_at
Ccdc71	coiled-coil domain containing 71	1.8698	1417955_at
Rrp12	ribosomal RNA processing 12 homolog (S. cerevisiae)	1.87013	1434239_at
Mrpl52	mitochondrial ribosomal protein L52	1.87015	1415761_at
Wdr1	WD repeat domain 1	1.87075	1423054_at
Ppm1l	protein phosphatase 1 (formerly 2C)-like	1.8713	1435787_at
Stxbp1	syntaxin binding protein 1	1.87157	1420505_a_at
Adk	adenosine kinase	1.87181	1446675_at
Man2a1	mannosidase 2, alpha 1	1.87342	1448647_at
Rbks	ribokinase	1.87385	1424841_s_at
Nat11	N-acetyltransferase 11	1.87416	1452120_at
B230120H23Rik	RIKEN cDNA B230120H23 gene	1.87434	1418943_at
Ppp2r4	protein phosphatase 2A, regulatory subunit B (PR 53)	1.87497	1448138_at
Arpc4	actin related protein 2/3 complex, subunit 4	1.87642	1423588_at
Pgpep1	pyroglutamyl-peptidase I	1.8765	1460001_at
Ptges2	prostaglandin E synthase 2	1.87791	1417591_at
Tbcel	tubulin folding cofactor E-like	1.87851	1454930_at
Cox5a	cytochrome c oxidase, subunit Va	1.87916	1448153_at
Camk1d	calcium/calmodulin-dependent protein kinase ID	1.87927	1426389_at
Usp7	ubiquitin specific peptidase 7	1.87933	1437118_at
Zscan12	zinc finger and SCAN domain containing 12	1.88161	1444149_at
Peli2	pellino 2	1.88286	1419006_s_at
Polg	polymerase (DNA directed), gamma	1.88297	1423272_at
Prpf19	PRP19/PSO4 pre-mRNA processing factor 19 homolog (S. cerevisiae)	1.88585	1419839_x_at
Plekhf2	pleckstrin homology domain containing, family F (with FYVE domain) member 2	1.88671	1423862_at
Cdk6	cyclin-dependent kinase 6	1.88905	1455287_at
Adcy7	adenylate cyclase 7	1.88944	1450065_at
Yipf1	Yip1 domain family, member 1	1.8914	1424196_at
3830612M24	hypothetical protein 3830612M24	1.89147	1435672_at
1700040I03Rik	RIKEN cDNA 1700040I03 gene	1.89149	1429122_a_at
Taok1	TAO kinase 1	1.89303	1424657_at
Rpap3	RNA polymerase II associated protein 3	1.89332	1448555_at
Gmppb	GDP-mannose pyrophosphorylase B	1.89393	1439030_at
Irg1	immunoresponsive gene 1	1.89442	1427381_at
Satb1	special AT-rich sequence binding protein 1	1.89519	1416008_at
Tulp3	tubby-like protein 3	1.89565	1449008_at
Mcm3	minichromosome maintenance deficient 3 (S. cerevisiae)	1.8958	1426653_at
Tbcd	tubulin-specific chaperone d	1.89765	1452194_at
Glrx3	glutaredoxin 3	1.89831	1417340_at
Eif3e	eukaryotic translation initiation factor 3, subunit E	1.89886	1460432_a_at
Aurkb	aurora kinase B	1.89943	1424128_x_at
Nup62	nucleoporin 62	1.89967	1438917_x_at
Ssx2ip	synovial sarcoma, X breakpoint 2 interacting protein	1.8999	1417514_at
Abca3	ATP-binding cassette, sub-family A (ABC1), member 3	1.90022	1451869_at
Ddx21	DEAD (Asp-Glu-Ala-Asp) box polypeptide 21	1.90039	1448271_a_at
Banf1	barrier to autointegration factor 1	1.90055	1421082_s_at
Rangap1	RAN GTPase activating protein 1	1.90088	1423749_s_at
Rps9	ribosomal protein S9	1.90128	1433689_s_at
Plk4	polo-like kinase 4 (Drosophila)	1.9017	1426580_at
Oaz1	ornithine decarboxylase antizyme 1	1.90221	1428868_a_at
Golm1	golgi membrane protein 1	1.90235	1415698_at
P2rx7	purinergic receptor P2X, ligand-gated ion channel, 7	1.90279	1439787_at
Ncoa3	nuclear receptor coactivator 3	1.90401	1422737_at
Larp2	La ribonucleoprotein domain family, member 2	1.90456	1451508_at
1700020C11Rik	RIKEN cDNA 1700020C11 gene	1.90652	1424223_at
Ccdc99	coiled-coil domain containing 99	1.9067	1424971_at
Grk6	G protein-coupled receptor kinase 6	1.90716	1451672_at
Fam126a	family with sequence similarity 126, member A	1.90761	1450724_at
Prkar2b	protein kinase, cAMP dependent regulatory, type II beta	1.90777	1430640_a_at
Atp5a1	ATP synthase, H+ transporting, mitochondrial F1 complex, alpha subunit, isoform 1	1.91082	1423111_at
A530023O14Rik	RIKEN cDNA A530023O14 gene	1.91144	1444179_at
Dgkd	diacylglycerol kinase, delta	1.91152	1454655_at
Prpf19	PRP19/PSO4 pre-mRNA processing factor 19 homolog (S. cerevisiae)	1.91179	1449635_at
Prkrir	protein-kinase, interferon-inducible double stranded RNA dependent inhibitor, repressor of (P58 repressor)	1.91187	1426483_at
9630019E01Rik	RIKEN cDNA 9630019E01 gene	1.91207	1459344_at
1500041N16Rik	RIKEN cDNA 1500041N16 gene	1.91405	1418732_s_at
Ubash3a	ubiquitin associated and SH3 domain containing, A	1.91441	1456065_at
Cdca7	cell division cycle associated 7	1.91735	1428069_at
Epb4.1	erythrocyte protein band 4.1	1.91743	1424092_at
Rad23b	RAD23b homolog (S. cerevisiae)	1.92141	1450903_at
Derl1	Der1-like domain family, member 1	1.92157	1415693_at
Rad54l	RAD54 like (S. cerevisiae)	1.92422	1450862_at
Tdp1	tyrosyl-DNA phosphodiesterase 1	1.92453	1426492_at
Bri3bp	Bri3 binding protein	1.92585	1428743_at
Irgm1	immunity-related GTPase family M member 1	1.92682	1418825_at
Chchd4	coiled-coil-helix-coiled-coil-helix domain containing 4	1.92726	1417233_at
Gng12	guanine nucleotide binding protein (G protein), gamma 12	1.92727	1455089_at
Nup35	nucleoporin 35	1.9284	1426447_at
Gbp3	guanylate binding protein 3	1.93099	1418392_a_at
Atic	5-aminoimidazole-4-carboxamide ribonucleotide formyltransferase/IMP cyclohydrolase	1.9317	1452811_at
2610002M06Rik	RIKEN cDNA 2610002M06 gene	1.93205	1419690_at
Slmo2	slowmo homolog 2 (Drosophila)	1.93336	1448543_at
Setdb1	SET domain, bifurcated 1	1.93491	1451833_a_at
Vdac2	voltage-dependent anion channel 2	1.93498	1415990_at
6330549H03Rik	RIKEN cDNA 6330549H03 gene	1.93526	1454631_at
Gdi2	guanosine diphosphate (GDP) dissociation inhibitor 2	1.94008	1420814_at
Naip2	NLR family, apoptosis inhibitory protein 2	1.9402	1460273_a_at
Cdv3	carnitine deficiency-associated gene expressed in ventricle 3	1.94032	1415704_a_at
Mpa2l	macrophage activation 2 like	1.94093	1438676_at
Sdad1	SDA1 domain containing 1	1.94168	1437088_at
Prmt5	protein arginine N-methyltransferase 5	1.9418	1427439_s_at
Akirin1	akirin 1	1.94418	1416912_at
Depdc6	DEP domain containing 6	1.94418	1443579_s_at
Efcab2	EF-hand calcium binding domain 2	1.9443	1420513_at
Got2	glutamate oxaloacetate transaminase 2, mitochondrial	1.94441	1417716_at
Armc8	armadillo repeat containing 8	1.94626	1434949_at
Lsm8	LSM8 homolog, U6 small nuclear RNA associated (S. cerevisiae)	1.94998	1448703_at
Ammecr1	Alport syndrome, mental retardation, midface hypoplasia and elliptocytosis chromosomal region gene 1 homolog (human)	1.95002	1430697_at
Srp14	signal recognition particle 14	1.95085	1418568_x_at
Gdpd1	glycerophosphodiester phosphodiesterase domain containing 1	1.95159	1424076_at
Tubgcp6	tubulin, gamma complex associated protein 6	1.9518	1435090_at
Mgll	monoglyceride lipase	1.95212	1426785_s_at
Mbnl3	muscleblind-like 3 (Drosophila)	1.95239	1442549_at
Ppp1cc	protein phosphatase 1, catalytic subunit, gamma isoform	1.95251	1452046_a_at
Oasl1	2@#$%&-5@#$%& oligoadenylate synthetase-like 1	1.95431	1424339_at
Bzrpl1	benzodiazapine receptor, peripheral-like 1	1.95653	1453047_at
Scyl2	SCY1-like 2 (S. cerevisiae)	1.95699	1446528_at
BC038925	cDNA sequence BC038925	1.95705	1457277_at
Adamts3	a disintegrin-like and metallopeptidase (reprolysin type) with thrombospondin type 1 motif, 3	1.95917	1441693_at
Ccrn4l	CCR4 carbon catabolite repression 4-like (S. cerevisiae)	1.96005	1425837_a_at
Hn1	hematological and neurological expressed sequence 1	1.96062	1416028_a_at
Espl1	extra spindle poles-like 1 (S. cerevisiae)	1.96209	1433862_at
Pgs1	phosphatidylglycerophosphate synthase 1	1.96217	1454046_x_at
Wdr79	WD repeat domain 79	1.96292	1423808_at
Rem2	rad and gem related GTP binding protein 2	1.96359	1457651_x_at
Ube2d3	ubiquitin-conjugating enzyme E2D 3 (UBC4/5 homolog, yeast)	1.96537	1455480_s_at
Khdrbs1	KH domain containing, RNA binding, signal transduction associated 1	1.96681	1418629_a_at
Aarsd1	alanyl-tRNA synthetase domain containing 1	1.96709	1424006_at
Rnf145	ring finger protein 145	1.96742	1452769_at
Gtf2f2	general transcription factor IIF, polypeptide 2	1.96745	1426626_at
Pld4	phospholipase D family, member 4	1.96781	1433678_at
Zfp828	zinc finger protein 828	1.96844	1436020_at
Rpl13a	ribosomal protein L13a	1.97096	1417608_a_at
Psmd9	proteasome (prosome, macropain) 26S subunit, non-ATPase, 9	1.9734	1423386_at
Endod1	endonuclease domain containing 1	1.97492	1433796_at
Slc14a1	solute carrier family 14 (urea transporter), member 1	1.97525	1428114_at
Tnfaip2	tumor necrosis factor, alpha-induced protein 2	1.97636	1438855_x_at
Tpx2	TPX2, microtubule-associated protein homolog (Xenopus laevis)	1.97661	1428105_at
Pgs1	phosphatidylglycerophosphate synthase 1	1.97727	1454045_a_at
Ywhaq	tyrosine 3-monooxygenase/tryptophan 5-monooxygenase activation protein, theta polypeptide	1.97852	1420828_s_at
Tcfe2a	transcription factor E2a	1.97882	1426297_at
Ep400	E1A binding protein p400	1.9804	1426860_at
Slc35a4	solute carrier family 35, member A4	1.98212	1416110_at
Elavl1	ELAV (embryonic lethal, abnormal vision, Drosophila)-like 1 (Hu antigen R)	1.98236	1448151_at
Srd5a3	steroid 5 alpha-reductase 3	1.98378	1423574_s_at
Nip7	nuclear import 7 homolog (S. cerevisiae)	1.98387	1448480_at
BC023892	cDNA sequence BC023892	1.98451	1437868_at
2810004N23Rik	RIKEN cDNA 2810004N23 gene	1.98582	1448947_at
St6galnac4	ST6 (alpha-N-acetyl-neuraminyl-2,3-beta-galactosyl-1,3)-N-acetylgalactosaminide alpha-2,6-sialyltransferase 4	1.98749	1418075_at
Rftn1	raftlin lipid raft linker 1	1.98806	1428696_at
Nsun2	NOL1/NOP2/Sun domain family member 2	1.98839	1423850_at
Smap2	stromal membrane-associated GTPase-activating protein 2	1.99194	1450675_at
Pcmt1	protein-L-isoaspartate (D-aspartate) O-methyltransferase 1	1.99196	1456604_a_at
Tmem188	transmembrane protein 188	1.99204	1452813_a_at
Tspan33	tetraspanin 33	1.99231	1451608_a_at
Casp3	caspase 3	1.99254	1426165_a_at
Dusp19	dual specificity phosphatase 19	1.99261	1448922_at
Epdr1	ependymin related protein 1 (zebrafish)	1.99309	1421815_at
Noc4l	nucleolar complex associated 4 homolog (S. cerevisiae)	1.99374	1423826_at
Hcfc2	host cell factor C2	1.99493	1428617_at
Ccdc88c	coiled-coil domain containing 88C	1.99967	1453330_at
Abcd2	ATP-binding cassette, sub-family D (ALD), member 2	2.001	1419748_at
1110020G09Rik	RIKEN cDNA 1110020G09 gene	2.00116	1437287_at
Birc1f	baculoviral IAP repeat-containing 1f	2.00138	1427434_at
Gspt1	G1 to S phase transition 1	2.00175	1452168_x_at
Snap23	synaptosomal-associated protein 23	2.00283	1420897_at
Mmd	monocyte to macrophage differentiation-associated	2.00356	1423489_at
Pex16	peroxisome biogenesis factor 16	2.00392	1425021_a_at
Golga4	golgi autoantigen, golgin subfamily a, 4	2.00619	1460213_at
Syncrip	synaptotagmin binding, cytoplasmic RNA interacting protein	2.00671	1422769_at
Wdr12	WD repeat domain 12	2.00672	1448646_at
Eif2s3x	eukaryotic translation initiation factor 2, subunit 3, structural gene X-linked	2.00735	1451090_a_at
Derl1	Der1-like domain family, member 1	2.00781	1423082_at
Pgd	phosphogluconate dehydrogenase	2.00801	1423706_a_at
Aen	apoptosis enhancing nuclease	2.00841	1423957_at
Abcf1	ATP-binding cassette, sub-family F (GCN20), member 1	2.00966	1426921_at
Gla	galactosidase, alpha	2.01107	1418248_at
Ugcg	UDP-glucose ceramide glucosyltransferase	2.01288	1421268_at
Ppap2a	phosphatidic acid phosphatase 2a	2.01377	1422620_s_at
Ncapd3	non-SMC condensin II complex, subunit D3	2.01438	1430782_at
Minpp1	multiple inositol polyphosphate histidine phosphatase 1	2.01461	1455787_x_at
Galnt1	UDP-N-acetyl-alpha-D-galactosamine:polypeptide N-acetylgalactosaminyltransferase 1	2.01497	1423237_at
Elp3	elongation protein 3 homolog (S. cerevisiae)	2.01605	1426643_at
Atox1	ATX1 (antioxidant protein 1) homolog 1 (yeast)	2.01681	1460639_a_at
Cds2	CDP-diacylglycerol synthase (phosphatidate cytidylyltransferase) 2	2.01812	1418794_at
Bysl	bystin-like	2.01813	1422767_at
Dtymk	deoxythymidylate kinase	2.01815	1449116_a_at
H60a	histocompatibility 60a	2.01845	1440145_at
Ldlrap1	low density lipoprotein receptor adaptor protein 1	2.01899	1424378_at
Bub1b	budding uninhibited by benzimidazoles 1 homolog, beta (S. cerevisiae)	2.01928	1416961_at
Mcart1	mitochondrial carrier triple repeat 1	2.01969	1454712_at
Kpna1	karyopherin (importin) alpha 1	2.02075	1460260_s_at
Sephs1	selenophosphate synthetase 1	2.02082	1433974_at
Rexo1	REX1, RNA exonuclease 1 homolog (S. cerevisiae)	2.02152	1429489_at
Tomm40l	translocase of outer mitochondrial membrane 40 homolog-like (yeast)	2.02229	1429382_at
Degs1	degenerative spermatocyte homolog 1 (Drosophila)	2.0232	1423345_at
Nudt7	nudix (nucleoside diphosphate linked moiety X)-type motif 7	2.02343	1431302_a_at
Nsf	N-ethylmaleimide sensitive fusion protein	2.02428	1422456_at
Sell	selectin, lymphocyte	2.02481	1419480_at
Lsm6	LSM6 homolog, U6 small nuclear RNA associated (S. cerevisiae)	2.02498	1437109_s_at
3110001D03Rik	RIKEN cDNA 3110001D03 gene	2.02635	1423317_at
Cdt1	chromatin licensing and DNA replication factor 1	2.02742	1424144_at
Cops8	COP9 (constitutive photomorphogenic) homolog, subunit 8 (Arabidopsis thaliana)	2.02748	1415934_at
Adrm1	adhesion regulating molecule 1	2.02784	1419263_a_at
Rnf149	ring finger protein 149	2.02862	1429321_at
1110049F12Rik	RIKEN cDNA 1110049F12 gene	2.02869	1428675_at
Sin3b	transcriptional regulator, SIN3B (yeast)	2.02961	1424355_a_at
Ddx54	DEAD (Asp-Glu-Ala-Asp) box polypeptide 54	2.03005	1460396_at
Eif3b	eukaryotic translation initiation factor 3, subunit B	2.03077	1426674_at
Tle1	transducin-like enhancer of split 1, homolog of Drosophila E(spl)	2.03116	1422751_at
Dock9	dedicator of cytokinesis 9	2.03138	1450931_at
4833424O12Rik	RIKEN cDNA 4833424O12 gene	2.03258	1431894_at
Atg12	autophagy-related 12 (yeast)	2.03356	1451747_a_at
Surf4	surfeit gene 4	2.03498	1448255_a_at
Nt5c2	5@#$%&-nucleotidase, cytosolic II	2.03521	1425933_a_at
Ndufa4	NADH dehydrogenase (ubiquinone) 1 alpha subcomplex, 4	2.0386	1424085_at
Rere	arginine glutamic acid dipeptide (RE) repeats	2.03889	1454670_at
BC035044	cDNA sequence BC035044	2.03947	1434929_at
Ext1	exostoses (multiple) 1	2.03981	1458054_at
Ccnb1-rs1	cyclin B1, related sequence 1	2.03987	1416076_at
Nr4a2	nuclear receptor subfamily 4, group A, member 2	2.04003	1455034_at
Dio2	deiodinase, iodothyronine, type II	2.04015	1418937_at
Ergic2	ERGIC and golgi 2	2.04019	1453796_a_at
Farsb	phenylalanyl-tRNA synthetase, beta subunit	2.04094	1423708_a_at
Ndufb9	NADH dehydrogenase (ubiquinone) 1 beta subcomplex, 9	2.04152	1452184_at
Psmd1	proteasome (prosome, macropain) 26S subunit, non-ATPase, 1	2.04186	1429291_at
Hist1h2bc	histone cluster 1, H2bc	2.04389	1418072_at
Mtm1	X-linked myotubular myopathy gene 1	2.04546	1454904_at
Tomm7	translocase of outer mitochondrial membrane 7 homolog (yeast)	2.04736	1428214_at
Hmga1	high mobility group AT-hook 1	2.04801	1416184_s_at
Wdr57	WD repeat domain 57 (U5 snRNP specific)	2.04866	1428264_at
Slc35b1	solute carrier family 35, member B1	2.04889	1448769_at
Slc7a5	solute carrier family 7 (cationic amino acid transporter, y+ system), member 5	2.04903	1418326_at
Thyn1	thymocyte nuclear protein 1	2.05011	1438480_a_at
Phb	prohibitin	2.05082	1417053_at
Srp14	signal recognition particle 14	2.05162	1418567_a_at
Cdca8	cell division cycle associated 8	2.05502	1428481_s_at
Ldha	lactate dehydrogenase A	2.05615	1419737_a_at
Prpf19	PRP19/PSO4 pre-mRNA processing factor 19 homolog (S. cerevisiae)	2.05723	1460633_at
Cdk5r1	cyclin-dependent kinase 5, regulatory subunit 1 (p35)	2.05727	1433451_at
Ier2	immediate early response 2	2.05808	1416442_at
Atp5h	ATP synthase, H+ transporting, mitochondrial F0 complex, subunit d	2.05881	1423676_at
Sh3kbp1	SH3-domain kinase binding protein 1	2.05914	1432269_a_at
Gspt1	G1 to S phase transition 1	2.05931	1426736_at
Hgsnat	heparan-alpha-glucosaminide N-acetyltransferase	2.05941	1450868_at
Ap2b1	adaptor-related protein complex 2, beta 1 subunit	2.05952	1452292_at
Kif22	kinesin family member 22	2.05962	1451128_s_at
Eif5a	eukaryotic translation initiation factor 5A	2.06009	1437859_x_at
Nr3c1	nuclear receptor subfamily 3, group C, member 1	2.06021	1421867_at
Mtch2	mitochondrial carrier homolog 2 (C. elegans)	2.061	1430474_a_at
Suz12	suppressor of zeste 12 homolog (Drosophila)	2.06244	1452364_at
Ganab	alpha glucosidase 2 alpha neutral subunit	2.06277	1415787_at
Itgb1	integrin beta 1 (fibronectin receptor beta)	2.0635	1452545_a_at
Spata5	spermatogenesis associated 5	2.06456	1417254_at
5330431N19Rik	RIKEN cDNA 5330431N19 gene	2.06518	1452603_at
Apaf1	apoptotic peptidase activating factor 1	2.06598	1452870_at
Uhrf1	ubiquitin-like, containing PHD and RING finger domains, 1	2.06628	1415811_at
Lcmt2	leucine carboxyl methyltransferase 2	2.06846	1433518_at
Etfb	electron transferring flavoprotein, beta polypeptide	2.06894	1428181_at
Eif4a1	eukaryotic translation initiation factor 4A1	2.06901	1430980_a_at
Arl6ip1	ADP-ribosylation factor-like 6 interacting protein 1	2.06944	1451131_at
Dkc1	dyskeratosis congenita 1, dyskerin homolog (human)	2.06963	1438015_at
Brd2	bromodomain containing 2	2.0698	1437210_a_at
Hars	histidyl-tRNA synthetase	2.07072	1438510_a_at
Sypl	synaptophysin-like protein	2.07107	1435082_at
Gadd45gip1	growth arrest and DNA-damage-inducible, gamma interacting protein 1	2.07287	1417619_at
Trim24	tripartite motif-containing 24	2.07439	1427258_at
Magt1	magnesium transporter 1	2.07561	1419459_a_at
Mta2	metastasis-associated gene family, member 2	2.07687	1423165_a_at
Dmap1	DNA methyltransferase 1-associated protein 1	2.07736	1417742_a_at
D5Wsu178e	DNA segment, Chr 5, Wayne State University 178, expressed	2.07907	1431802_a_at
2310008M10Rik	RIKEN cDNA 2310008M10 gene	2.08136	1449139_at
Stt3b	STT3, subunit of the oligosaccharyltransferase complex, homolog B (S. cerevisiae)	2.08148	1426343_at
Hsph1	heat shock 105kDa/110kDa protein 1	2.08193	1423566_a_at
Gcs1	glucosidase 1	2.08345	1422489_at
Rab24	RAB24, member RAS oncogene family	2.08361	1421872_at
2310008H09Rik	RIKEN cDNA 2310008H09 gene	2.08364	1436541_at
Hspd1	heat shock protein 1 (chaperonin)	2.08397	1426351_at
Uba1	ubiquitin-like modifier activating enzyme 1	2.08966	1448116_at
[truncated: 527 more rows]
