# Supplementary material for: Runx1 Loss Minimally Impacts Long-Term Hematopoietic Stem Cells
Source: PLoS One. 2011 Dec 1;6(12):e28430. doi: 10.1371/journal.pone.0028430 (PMC3228772; doi:10.1371/journal.pone.0028430)
Supplement: Table S4 — Overlap of differentially expressed genes, and genes occupied by Runx1 in HPC-7 cells according to Wilson et al. [44] . Column A lists genes occupied by Runx1 [44]. Columns C, E, and G are genes differentially expressed in Runx1 deficient LSKF-, LSKF+ or in both LSKF- and LSKF+ cells. Columns I, K, and M list overlap between differentially genes and occupied genes in each cell population. (XLS) [file pone.0028430.s004.xls]

## Sheet: Sheet1
Wilson		LSKF-		LSKF+		LSKF-, LSKF+		LSKF-, LSKF+, Wilson		LSKF-, Wilson		LSKF+, Wilson
0610007P08Rik		40067		100040151		39874		1110028C15Rik		1110003E01Rik		1110018J18Rik
0910001L09Rik		547127		1110007L15Rik		40062		1500031L02Rik		1110020G09Rik		1110067D22Rik
1110002B05Rik		0610009L18Rik		1110012M11Rik		40064		2310028O11Rik		1110034G24Rik		2010111I01Rik
1110012J17Rik		0610011L14Rik		1110021L09Rik		100039909		2810410L24Rik		1700025G04Rik		5430435G22Rik
1110021J02Rik		0610040B09Rik		1110054O05Rik		100041294		5730508B09Rik		1700026L06Rik		5830416P10Rik
1110058L19Rik		1110005A03Rik		1110057K04Rik		100042016		Abcb4		2210009G21Rik		A930005H10Rik
1500002O20Rik		1110007M04Rik		1190002F15Rik		100042603		Abcf1		2310035C23Rik		Abcb8
1500011B03Rik		1110037F02Rik		1200002N14Rik		100042856		Acot11		2310044G17Rik		Adipor2
1600012F09Rik		1110049F12Rik		1300003B13Rik		100043821		Acss1		2400003C14Rik		AI480653
1600029D21Rik		1200003I07Rik		1500019G21Rik		0610007L01Rik		Actb		2410076I21Rik		Angptl1
1700001C19Rik		1200016E24Rik		1700029J07Rik		1110008F13Rik		Adam11		2510003E04Rik		Ank
1700009P17Rik		1300001I01Rik		1700049G17Rik		1110013L07Rik		Adk		2610034M16Rik		Ap1s3
1700012B07Rik		1300007F04Rik		1700129I15Rik		1110018G07Rik		Ak2		4930453N24Rik		Apbb2
1700016H13Rik		1500003O22Rik		1810008A18Rik		1110020C03Rik		Alas1		Abhd6		Arhgap18
1700017B05Rik		1500005A01Rik		1810029B16Rik		1190007F08Rik		Als2		Adcy7		Arhgap9
1700019O17Rik		1600016N20Rik		1810033B17Rik		1300018I05Rik		Ampd3		Ahi1		Arhgdib
1700020N01Rik		1700020C11Rik		1810063B05Rik		1500009L16Rik		Angpt1		Anp32a		Arhgef12
1700022C21Rik		1700020I14Rik		2210012G02Rik		1500032L24Rik		Ank1		Ap1b1		Atrnl1
1700023D19Rik		1700021F05Rik		2210017G18Rik		1500041N16Rik		Appl2		Apip		Bat2d
1700026D11Rik		1700021P22Rik		2310009A05Rik		1700006J14Rik		Arl6ip1		Arpc1a		BC024814
1700029F12Rik		1700040I03Rik		2310009B15Rik		1700029I15Rik		Asph		Arrb1		Bin1
1700040L02Rik		1700052N19Rik		2410005O16Rik		1810010M01Rik		Aspm		Ascc1		Cass4
1700057G04Rik		1700054N08Rik		2610002D18Rik		2010001J22Rik		Atic		Atp1b3		Ccdc12
1700057K13Rik		1810009O10Rik		2610024G14Rik		2210016F16Rik		Atp13a3		Atp6v0a1		Ccdc39
1700081L11Rik		1810034K20Rik		2610528G24Rik		2210023G05Rik		Atp6v0a2		Atp8b4		Ccl3
1700090G07Rik		2010301N04Rik		2810021B07Rik		2310008H09Rik		B3gnt2		Azin1		Ccl6
1700106J16Rik		2010316F05Rik		2810403A07Rik		2310008M10Rik		Bax		Bach2		Ccnd1
1700106N22Rik		2210010N04Rik		2810442I21Rik		2310010M24Rik		Bbs4		BC011426		Ccr2
1700108F19Rik		2310001H17Rik		2900011L18Rik		2310026E23Rik		Bid		BC026585		Cd69
1700108M19Rik		2310002J21Rik		2900056M20Rik		2310047M10Rik		Brd2		Bcar3		Chd7
1700112E06Rik		2310003F16Rik		3110043O21Rik		2310050P20Rik		Bysl		Bmp1		Cited2
1810007M14Rik		2310056P07Rik		3110056O03Rik		2310057J16Rik		Cabc1		Bzrap1		Cnnm2
1810012P15Rik		2510039O18Rik		3300001G02Rik		2310061I04Rik		Camk1d		C77080		Col19a1
1810030J14Rik		2610014I16Rik		4632427E13Rik		2310066E14Rik		Cap1		Car2		Coro7
1810041L15Rik		2610027L16Rik		4832420A03Rik		2610002M06Rik		Car3		Ccdc32		Cotl1
1810043G02Rik		2610029I01Rik		4921505C17Rik		2610110G12Rik		Ccl9		Ccdc88c		Cpt1a
1810046K07Rik		2610030H06Rik		4921511H13Rik		2700008G24Rik		Cd200r3		Ccdc93		Csk
1810048J11Rik		2610204K14Rik		4921537I17Rik		2810004N23Rik		Cd244		Ccrn4l		Csrp1
1810058I24Rik		2610507B11Rik		4930430F08Rik		2810055G20Rik		Cd300lb		Cdk6		Ctss
1810063B07Rik		2810405J04Rik		4930570C03Rik		2900006B11Rik		Cd47		Cdk9		Cttn
2010002N04Rik		2810408I11Rik		4932413O14Rik		2900072G11Rik		Cd48		Cdkn2aipnl		D330050I23Rik
2210018M11Rik		2810416A17Rik		4933406E20Rik		3110001D03Rik		Cd93		Cdyl		D8Ertd82e
2210020M01Rik		2900005J15Rik		4933407C03Rik		3110027N22Rik		Clca1		Cebpa		Dcun1d1
2210403K04Rik		3110009E22Rik		4933434I06Rik		3222402P14Rik		Clca2		Chchd4		Diras2
2210404J11Rik		3830612M24		5830428H23Rik		4631426J05Rik		Clec4d		Chsy1		Dnajc11
2210408I21Rik		4432416J03Rik		6330403M23Rik		4632428N05Rik		Clic4		Cks2		Dnajc6
2210417A02Rik		4632404H12Rik		6530404N21Rik		4733401A01Rik		Clnk		Clec1a		Dntt
2310007H09Rik		4732460I02Rik		6620401K05Rik		4930500O05Rik		Cnn3		Cmah		Dusp7
2310014H01Rik		4833424O12Rik		6720456B07Rik		4930519L02Rik		Cnot8		Commd7		Egfl7
2310030N02Rik		4930456A14Rik		6820402A03Rik		4930578N16Rik		Cnr2		Copz1		Eml4
2310067B10Rik		4930528F23Rik		9230110I02Rik		4931440B09Rik		Comt1		Cox5a		Evl
2310079F23Rik		4930551O13Rik		9330161L09Rik		4933439C20Rik		Coro2b		Creg1		Fcgr2b
2410004B18Rik		4932415G12Rik		9530077C05Rik		5230400M03Rik		Cpa3		Csad		Fermt3
2410006H16Rik		4933406C10Rik		9630013D21Rik		5330431N19Rik		Cpsf6		Cxxc5		Fnbp1l
2510049J12Rik		4933424B01Rik		A230106D06Rik		5730507N06Rik		Csf2rb		Cyp2j9		Ftl1
2610001J05Rik		4933425L03Rik		A830010M20Rik		5730601F06Rik		Csf2rb2		D16Ertd472e		Fut8
2610017I09Rik		5033403F01Rik		A830031M15Rik		5830417I10Rik		Csgalnact1		Dapk2		Fxc1
2610019F03Rik		5730414N17Rik		A830059I20Rik		5930427L02Rik		Ctr9		Ddit4		Gcnt1
2610036L11Rik		5730593F17Rik		A930026B05Rik		6330442E10Rik		Cxcr4		Ddx18		Gcnt2
2610204M08Rik		5830455E04Rik		A930037G23Rik		6720401G13Rik		Cyth3		Ddx19a		Gimap4
2610301B20Rik		5830456J23Rik		Aak1		6720454L07Rik		D2hgdh		Ddx6		Glt25d1
2610301G19Rik		6030443O07Rik		Abca9		6720475J19Rik		Daam1		Dhrs4		Gpr183
2610528E23Rik		6030445D17Rik		Abcg2		8430408G22Rik		Dad1		Dhx30		Gsn
2700029M09Rik		6330549H03Rik		Abhd12		8430419K02Rik		Ddx54		Dpy19l1		Hax1
2700049A03Rik		6330578E17Rik		Abtb1		9030425L15Rik		Derl1		E2f8		Hectd1
2810408M09Rik		6620401M08Rik		Aco1		9030617O03Rik		Dgkd		Emilin2		Helz
2810453I06Rik		6720458F09Rik		Acss2		9030619P08Rik		Dok2		Epb4.1		Hemgn
2900026A02Rik		8430408J09Rik		Acy1		9130011J15Rik		Dtymk		Eprs		Hexim2
3110052M02Rik		9030611O19Rik		Adamtsl4		9130023H24Rik		Dyrk1a		Ercc3		Hs6st1
3110082I17Rik		9030624J02Rik		Adrbk1		9130213B05Rik		Eif2ak1		Esr1		Ifngr2
3830408C21Rik		9130404D14Rik		Afap1		9430020K01Rik		Eif5a		Fap		Igf2r
3930402G23Rik		9530085L11Rik		AI426953		9430081I23Rik		Elavl1		Fgd2		Il12a
4632411B12Rik		9630019E01Rik		AI449175		9530019H20Rik		Etf1		Flt3		Il6st
4732471D19Rik		A130012E19Rik		AI747699		9530058B02Rik		Fcgr3		Galnt1		Il7r
4831426I19Rik		A130090K04Rik		Akna		9630026M06Rik		Ffar2		Gan		Inpp1
4831440E17Rik		A430102J17Rik		Akt3		9830134C10Rik		Fgf3		Gas2l3		Irak3
4921507P07Rik		A630081D01Rik		Aldh16a1		A330075M08Rik		Fhl1		Gch1		Itga9
4921515J06Rik		A830021K08Rik		Aldh1a7		A530023O14Rik		Fli1		Gnl2		Itgb3bp
4921524J17Rik		A930024E05Rik		Aldoa		A730054J21Rik		Fndc3b		Golga4		Itgb5
4921528I01Rik		A930026I22Rik		Alkbh8		A730056I06Rik		Frmd4b		Golm1		Kcng1
4922502D21Rik		A930041I02Rik		Als2cr4		A730089K16Rik		Fscn1		Grit		Krt80
4930402F06Rik		Aaas		Anapc5		Aars		Gadd45g		Gyg		Lats2
4930412C18Rik		Aarsd1		Angel2		AB124611		Galc		Heatr1		Lcp2
4930415F15Rik		Aasdhppt		Aoah		Abca3		Galnt2		Ica1		Lgals1
4930427A07Rik		Abcb1a		Aplnr		Abcb6		Gata1		Ifitm1		Lrp1
4930444G20Rik		Abcb1b		Araf		Abcc5		Gda		Il6		Lrrc33
4930481A15Rik		Acaa2		Armet		Abcd2		Gfi1b		Irg1		Man1c1
4930503B20Rik		Acad11		Arntl2		Abcg4		Glg1		Itga4		Map3k7ip2
4930511I11Rik		Acot1		Asb13		Acad9		Glt8d2		Itsn1		Map4k4
4930511M11Rik		Acsl4		Asrgl1		Acbd3		Gna14		Jag2		Mapkapk2
4930523C07Rik		Acsl5		Atp6v1b2		Acp1		Gnb4		Kctd20		Mapkapk3
4930549C01Rik		Actr1a		Atp6v1h		Acp2		Gng12		Kif13a		Mgat5
4930550C14Rik		Actr1b		Atp7a		Acsl6		Grb2		Kif17		Mkrn2
4931406C07Rik		Acvr2a		AU020177		Actn1		Grn		Klf6		Mthfs
4931406P16Rik		Adam10		AU021001		Adar		H2-DMa		Ksr1		Myo1f
4931440L10Rik		Adam22		Baz2a		Add2		Hbs1l		Lama3		Ndufa12
4932418E24Rik		Adamts3		Bbs1		Adrm1		Hcfc2		Laptm4a		Nfam1
4932435O22Rik		Add1		BC013712		Afg3l2		Hck		Large		Nme1
4932438A13Rik		Ado		BC017612		Afp		Hdgf		Lias		Notch1
4933403F05Rik		Adprhl2		BC063263		Ahr		Hlf		Lmtk2		Osbpl8
4933404O12Rik		Aen		BC068281		AI451617		Hmga1		Lpin2		Paqr8
4933406I18Rik		Aftph		BC088983		AI503316		Hmga2		Lss		Pde8a
4933406M09Rik		Agbl5		Bcat1		AI646383		Ifi202b		Lyn		Pex5
4933407K13Rik		Agpat2		Bcl2l12		Aire		Ifi203		Mapk12		Pi16
4933413N12Rik		AI450540		Bivm		Ak3l1		Ifnar2		Mars		Pla2g4a
4933426M11Rik		AI451458		Blnk		Akirin1		Ifngr1		Mc1r		Plekha5
4933432I09Rik		AI645535		Bmi1		Alcam		Ifrd2		Mcart1		Polr3b
5031414D18Rik		AI661323		Bop1		Aldoc		Il12rb1		Mctp1		Ppcdc
5033406O09Rik		AI790298		Bsg		Alg8		Il18r1		Mettl8		Prkcd
5033411D12Rik		AK122209		C030044C12Rik		Alkbh5		Il18rap		Mical3		Prkcsh
5330426P16Rik		Alms1		C130038G02Rik		Amd1		Il1r1		Mllt6		Prmt3
5330437I02Rik		Ammecr1		C130081A10Rik		Amn1		Il1rl1		Msh3		Ptgds
5430407P10Rik		Anapc10		C130098B18Rik		Anxa3		Il6ra		Mycn		Ptpro
5730419I09Rik		Ap2b1		C1r		Anxa4		Isca1		Nbeal2		Rab27b
5730559C18Rik		Apcdd1		C230085N15Rik		Ap3s1		Itga6		Ncapd3		Rab38
5830405N20Rik		Api5		C3		Apaf1		Itgal		Ndrg1		Rab8a
6030419C18Rik		Aqp9		C330011K17Rik		Apeh		Itgb7		Nln		Rabggtb
6030468B19Rik		Arf3		C530043G21Rik		Aph1b		Itih5		Nmnat3		Rac1
6330403A02Rik		Arfrp1		C78339		Aplp2		Itm2b		Npdc1		Rac2
6330406I15Rik		Arhgap19		C86595		Apob		Kcnn4		Nr2c1		Rai14
6330577E15Rik		Arhgap5		Cad		Apob48r		Laptm5		Nr3c1		Rasa2
6430527G18Rik		Arid4b		Capg		Apoe		Larp1		Nr4a2		Rbl2
6430531B16Rik		Arih1		Caprin2		App		Ldlrap1		Nt5c2		Rgl1
6820431F20Rik		Arl6ip2		Caps2		Aqp1		Lgals9		Nucks1		Rgs18
7530420F21Rik		Arl6ip6		Car13		Arf4		Lmna		Nudt7		Rgs8
8430419L09Rik		Armc8		Cars2		Arhgap26		Lpcat2		Nup160		Rhob
8430427H17Rik		Arpc4		Cbl		Arhgap29		Lpxn		Nup50		Rpl18
9030025P20Rik		Arrb2		Cbx5		Arhgef16		Ly86		Nupr1		Scamp2
9130024F11Rik		Ascc3		Ccdc124		Arl2bp		Maf1		Oat		Scarb1
9230110C19Rik		Aspa		Ccdc128		Armcx1		Mamdc2		Odc1		Scin
9430023L20Rik		Atg12		Ccdc56		Armcx2		Man2a1		Opa1		Sdc1
9430060I03Rik		Atg2b		Ccdc86		Arrdc4		Map3k8		Orc5l		Sdhb
9430070O13Rik		Atp5s		Ccl4		Asah3l		Mcm5		Otud5		Sec11a
9630028H03Rik		Atp6v1f		Cd14		Asb1		Med12l		Pak1		Sec61a1
9830001H06Rik		AU015603		Cd52		Ass1		Meis1		Palld		Sf3b5
9930012K11Rik		Aurka		Cd74		Atox1		Mmd		Parvb		Sgtb
9930023K05Rik		Aurkb		Cd97		Atp1b2		Mmp14		Pcbp1		Sh2d5
a		B230120H23Rik		Cdc42		Atp5a1		Mpl		Pcdh7		Slc15a3
A1bg		Bambi		Cdh13		Atp5b		Mpo		Pctk3		Slc18a2
A1cf		Banf1		Cenpa		Atp5g1		Mpp4		Pde3b		Smarca2
A2bp1		BC017643		Cfl2		Atp5h		Mrpl15		Pdlim5		Snd1
A430078G23Rik		BC028789		Chek1		Atp5o		Mrpl45		Picalm		Sorbs1
A530016L24Rik		BC035044		Chmp2b		Atp8a1		Mrpl52		Pik3cb		Spata13
A530064D06Rik		BC038925		Ckap4		AW493563		Msi2		Pkig		Srp9
A530082C11Rik		BC066028		Clec7a		AW555464		Mylk3		Plek		Srpk2
A630001G21Rik		BC067047		Cnot7		B230317C12Rik		Nadk		Polr3k		Ss18
A630055G03Rik		Bclaf1		Cnp		B3galt6		Nans		Ppfia1		St3gal6
A930007I19Rik		Bdh2		Col4a1		B3gnt5		Nap1l1		Ppm1e		St8sia4
A930011G23Rik		Bdp1		Col4a3bp		B430201A12Rik		Nat10		Ppm1h		Steap3
A930015D03Rik		Bex4		Comtd1		B4galnt1		Nav2		Ppp1r10		Stmn1
AA408296		Bnip2		Cops5		Bace1		Nbea		Ppp1r12a		Sub1
AA986860		Brp16		Cops6		Bap1		Ncf4		Ppp1r9a		Tax1bp1
Aars2		Btf3l4		Coq9		Baz1a		Ncoa3		Ppp2cb		Tbl1xr1
Aatk		Bub1		Coro1a		BC002163		Nek2		Ppp2r4		Tbl3
Abca1		Bub1b		Cox17		BC018465		Nfatc2		Prkrip1		Tceb3
Abca2		Bxdc1		Cox4i1		BC023744		Nol9		Prkrir		Tmprss4
Abcb9		Bxdc5		Cox7a2		BC023892		Nomo1		Psat1		Usp54
Abcc1		Bzrpl1		Cpsf3l		BC024659		Nrxn1		Psmd12		Vezf1
Abcg1		Bzw1		Creb3		BC039210		Nsun2		Pstpip2		Vps37c
Abhd15		C030007I09Rik		Cript		BC051142		Nuak2		Ptch1		Wdr51b
Abhd2		C030044B11Rik		Csnk2b		BC052328		Nucb2		Ptpn22		Wdr81
Abhd3		C330006P03Rik		Cst3		Bcl2l13		Nup35		Ptprs		Xpo5
Abi2		C330023M02Rik		Ctsh		Bcnp1		Nup54		Pus7l		Zbtb16
Abi3		C78516		Ctsl		Bdh1		Oasl1		Pvrl2
Abr		C80425		Cul2		Bex1		Optn		Rab14
Acadm		C80913		Cybb		Bgn		Osbpl1a		Rab4a
Acap2		Cacnb2		Cyp27a1		Birc1f		P2rx7		Rabep2
Acbd6		Casc5		D0H4S114		Blvrb		Pafah2		Rabgap1l
Accn1		Ccdc102a		D10627		Bola2		Pard3b		Rap2b
Accn2		Ccdc46		D10Bwg1364e		Brcc3		Pdzk1ip1		Rasa3
Accn4		Ccdc69		D10Ertd276e		Brd4		Peli2		Rcc2
Accsl		Ccdc71		D930028F11Rik		Brd8		Pglyrp2		Rcl1
Acin1		Ccdc91		Dbi		Bri3bp		Pgm1		Rgs7bp
Acox2		Ccdc99		Dbnl		Brwd2		Phb		Rnf149
Acoxl		Ccl27		Dcxr		Btg2		Phlda1		Rpia
Acsbg2		Ccnb1		Ddi2		Bzw2		Pip4k2a		Sbf2
Acsf3		Ccnf		Ddx19b		C230098O21Rik		Pisd		Scrn1
Acsl1		Ccng1		Ddx56		C730029A08Rik		Plekhf2		Sema4f
Actbl2		Cd27		Dera		Cacna1a		Plscr4		Sergef
Actl6a		Cdc25c		Dgkg		Cadps2		Plxnc1		Sgce
Actr2		Cdc34		Dhx8		Calml4		Polg		Shroom3
Actr3		Cdca4		Dip2c		Camsap1l1		Ppm1l		Siah2
Acvr1b		Cdca7		Dlgap4		Cand2		Prkar2b		Sla2
Acvrl1		Cdca8		Dnaja3		Capza1		Prkg1		Slc16a9
Acyp2		Cdkn1c		Dnmt3b		Car1		Procr		Slc22a3
Ada		Cdv3		Dnttip2		Casp12		Prpf6		Slc35e4
Adam23		Centg2		Dok3		Casp3		Prrc1		Slco3a1
Adam24		Cep152		Dus2l		Casp4		Psen2		Snx24
Adamts10		Cggbp1		Dynll2		Cav2		Psmb9		Soat1
Adamts14		Chad		Dzip1		Cc2d2a		Ptger2		Sox4
Adamts20		Chd2		Dzip3		Ccdc112		Pts		Srebf2
Adamts6		Chic1		Eapp		Ccdc117		Pvt1		St3gal2
Adamts9		Chst1		Eefsec		Ccdc21		Ralgps2		Stat3
Adap1		Ciapin1		Efhc2		Ccdc62		Ramp1		Stk16
Adc		Cisd1		Eftud2		Ccl17		Rassf6		Stx3
Adcy2		Clasp1		EG433182		Ccnb1ip1		Rbms1		Tbc1d14
Adcy9		Clip3		Eif1ay		Ccnb1-rs1		Rcbtb2		Tbcel
Adcyap1r1		Clk2		Eif2b3		Ccne1		Rcn2		Tbl1x
Add3		Clspn		Elovl1		Ccrl1		Rere		Tbxas1
Adipor1		Cobll1		Enah		Cct2		Rftn1		Tex9
Adnp		Cog4		Eno1		Cct3		Rgs12		Thoc3
Adora2a		Copg2		ENSMUSG00000052976		Cct7		Rgs3		Tm9sf4
Adora3		Cops2		ENSMUSG00000057924		Cd200		Rhag		Tmcc2
Adprhl1		Cops8		Entpd5		Cd200r4		Rhog		Tmem48
Adra1b		Coq10b		Eraf		Cd24a		Rpn1		Tmem71
Adra2a		Cox7a1		Ergic3		Cd55		Rps9		Tmpo
Adrb2		Cpsf2		Erp29		Cd72		Rreb1		Tnfrsf13c
Adss		Crebzf		Ets1		Cd96		Runx1		Tnik
Afap1l1		Csnk1e		Exosc4		Cdc42ep4		Samm50		Tpst1
Aff1		Ctdp1		Eya1		Cdcp1		Sbk1		Traf1
Aff3		Cttnbp2nl		Fau		Cdk5r1		Scrib		Trappc10
Aff4		Cxxc1		Fbxl6		Cds2		Scyl1		Tspan4
Afm		Cyld		Fbxo31		Cdt1		Sell		Ttll11
Agap1		Cyp4b1		Fem1a		Cebpd		Shisa2		Tubb2a
Agap2		D030011O10Rik		Fen1		Centd3		Six6os1		Ublcp1
Agpat3		D11Ertd717e		Fes		Cherp		Slc16a10		Uhrf1bp1l
Agpat4		D12Ertd647e		Fibp		Chfr		Slc20a1		Umps
Agpat5		D130020L05Rik		Flii		Chrnb1		Slc22a23		Upp1
Agps		D15Wsu126e		Fn1		Clcf1		Slc24a3		Usp39
Agr2		D15Wsu75e		Fnip1		Cldn12		Slc2a1		Usp48
Agtpbp1		D16H22S680E		Ftl2		Cldn13		Slc30a4		Vdac1
Agtr1b		D1Ertd622e		Fus		Clta		Slc38a1		Whsc1l1
Ahctf1		D2Bwg1335e		Fut4		Clybl		Slc40a1		Zdhhc14
Ahdc1		D330038O06Rik		Fzd6		Cndp2		Slc45a3		Zfp608
AI467606		D4Ertd298e		G6pdx		Cog8		Slc4a7		Znrf1
AI506816		D5Wsu178e		Gab3		Col1a2		Slco4a1
AI593442		D6Wsu176e		Gapdh		Col5a1		Smarca5
AI646023		Dda1		Gas5		Coq3		Smu1
AI661453		Ddb1		Gbp6		Cox6b1		Snrpd3
AI848100		Ddx21		Gdap10		Cox6c		Snx9
Aig1		Degs1		Gltscr2		Cpox		Sod1
Aim2		Dennd1c		Gnb1		Crispld1		Sox6
Airn		Dennd2d		Gnb2		Cs		Spcs3
Ak1		Denr		Gnpnat1		Csf1r		Srm
Akap13		Derl2		Gorasp1		Cst7		Srp14
Akap2		Dffa		Gorasp2		Ctla2b		St3gal5
Akap5		Dhps		Got1		Ctps		St6gal1
Akap7		Dhx38		Gpx4		Ctse		Stat1
Akap9		Dio2		Gria3		Ctsg		Stom
Akirin2		Dkc1		Gspt2		Ctsw		Stx11
Akr1c13		Dlst		Gtf3c1		Ctsz		Stxbp4
Alad		Dmap1		Gtf3c6		Cx3cr1		Sypl
Aldh1l1		Dmd		Gtpbp4		Cxcl2		Taok3
Aldh8a1		Dmkn		Gtrgeo22		Cyb5b		Tbcb
Alg14		Dna2		Guf1		Cyba		Tbcd
Alk		Dnahc1		H28		Cyp4v3		Tex2
Alox5ap		Dnahc12		H2-K1		Cyp7b1		Tfrc
Alox8		Dnajc18		H2-L		D10Ertd641e		Tgfb1
Alpk2		Dnajc21		H3f3b		D12Ertd123e		Tgs1
Als2cr11		Dnajc25		Hectd2		D13Wsu177e		Tifab
Amdhd2		Dnalc1		Hexa		D15Mgi27		Tmed10
Amigo1		Dnm2		Hexb		D17Wsu104e		Tmed7
Amz2		Dnmt1		Hexim1		D1Ertd448e		Tmem53
Ang		Dock6		Hist1h3a		D330040H18Rik		Tnfaip2
Angptl2		Dusp11		Hist2h2be		D3Ertd300e		Tnk2
Angptl4		Dusp19		Hook1		D4Ertd617e		Trim47
Ank3		Dync1h1		Hp		D630039A03Rik		Trmt1
Ankar		E030024N20Rik		Hpse		Ddb2		Tspan33
Ankrd11		E430028B21Rik		Hras1		Ddost		Tspyl4
Ankrd13a		Edem1		Hsd11b1		Ddx24		Ttc39b
Ankrd13c		Eef1d		Hsp90b1		Ddx39		Txn2
Ankrd27		Eef1g		Hspa12b		Ddx46		Ubash3a
Ankrd28		Efcab2		Htatip2		Ddx49		Uck2
Ankrd33b		EG433844		Ica1l		Depdc6		Ugcg
Ankrd44		EG627232		Ier3ip1		Dkkl1		Vldlr
Ankrd54		Egr2		Ift74		Dmxl2		Wdfy1
Ankrd57		Ehd1		Iigp2		Dnaja2		Yipf1
Ankrd6		Eif1ad		Ikbkap		Dnajc19		Ywhaz
Ankrd61		Eif2ak2		Insig2		Dnajc3		Zbtb34
Ankrd9		Eif2b4		Invs		Dnase2a		Zc3hav1
Anks1		Eif3f		Ipo8		Dnmbp		Zeb2
Anks3		Eif4b		Itgb2		Dock9		Zfhx3
Ano1		Eif5		Jarid2		Dsg2		Zfp36
Ano10		Eif6		Kcnk12		Dst		Zfp386
Ano2		Ela1		Kcnk6		Dut		Zfp521
Ano6		Elf2		Kctd12b		Dynll1		Zfp532
Anp32b		Elmo3		Klhdc1		Ebp
Antxr2		Emg1		Kmo		Ecm1
Anubl1		Endod1		Krt18		Eef1e1
Anxa6		Enpp1		Lct		Eef2
Anxa9		ENSMUSG00000072769		Lgals3		EG331392
Aox4		ENSMUSG00000073019		Lmbr1		EG434228
Ap1ar		ENSMUSG00000074747		LOC100036521		EG667823
Ap1g1		Entpd7		LOC100039864		Egln1
Ap1m1		Epb4.1l4b		LOC100043601		Ehbp1l1
Ap2a1		Epdr1		LOC100048397		Eid2
Ap3b1		Erap1		LOC14210		Eif2b1
Apba2		Ergic2		LOC432459		Eif2b5
Apbb1ip		Espl1		LOC73899		Eif2s3x
Aplf		Evc2		Lrrc9		Eif3b
Apobec4		Evi2a		Lrwd1		Eif3c
Apol9b		Exoc8		Lsm4		Eif3d
Apool		Exosc3		Ly6c1		Eif3e
Aqp11		Exosc6		Ly6e		Eif4a1
Arap1		Exosc7		Lyplal1		Eif4ebp1
Arap3		Exosc9		Mapbpip		Eif5b
Arfip1		Eya3		Mapre1		Ela2
Arhgap10		Fahd2a		Marcksl1		Elp3
Arhgap15		Fam126a		Mark2		Eml5
Arhgap24		Fam174b		Mbd3		ENSMUSG00000068790
Arhgap25		Farsb		Mepce		ENSMUSG00000073624
Arhgap30		Fbl		Met		Ep400
Arhgap6		Fbxo17		Mettl11a		Epor
Arhgef10l		Fech		Mga		Eps8l1
Arhgef2		Fgd6		Mgst2		Erdr1
Arhgef6		Fkbp2		Mid1ip1		Ermap
Arhgef7		Fmnl2		Mmp15		Ero1l
Arid1a		Foxk2		Morc3		Etfb
Arid1b		Ftsj2		Mpeg1		Evi1
Arid3b		Ftsj3		Mpp1		Ext1
Arid5a		Fuca1		Mrpl20		F13a1
Arih2		Fusip1		Mrpl23		Fah
Arl4c		Fxr1		Mrpl27		Fam167a
Arl4d		G3bp1		Mrpl36		Fars2
Arl5b		Gabpb2		Mrpl41		Fbp1
Arl6ip5		Gak		Mrpl50		Fbxw2
Arl8b		Galk1		Mrps14		Fbxw4
Armc2		Ganab		Ms4a6c		Fdps
Armc3		Gars		Mtap7		Fgd1
Armc6		Gart		Mtap7d1		Fgd5
Armc7		Gbf1		Mybbp1a		Fgl2
Armc9		Gclc		Mybl2		Fis1
Arnt		Gdi2		Myct1		Fkbp4
Arntl		Gdpd1		Myd116		Fkbp9
Arpc3		Gfm1		Myh10		Flywch2
Arsg		Gfm2		Myo15b		Frag1
Art4		Gga2		Myst2		Fstl1
Artn		Ggnbp2		N6amt2		Fxn
Arvcf		Ghr		Ndufa1		Gabbr1
As3mt		Gimap5		Ndufa11		Gadd45gip1
Asap1		Git2		Ndufa3		Galnt12
Asb14		Glis2		Ndufa7		Gapvd1
Asb2		Glo1		Ndufa8		Garnl4
Asphd2		Glrx3		Ndufb2		Gatad2a
Asprv1		Gm447		Ndufb4		Gatm
Atf6		Gmfb		Ndufb7		Gba
Atf7ip		Gna13		Ndufs4		Gbp1
Atg10		Gpatch8		Ndufs6		Gbp3
Atg16l1		Gpn1		Ndufs8		Gcet2
Atg16l2		Gpn2		Ndufv2		Gclm
Atg4c		Gpr171		Nfat5		Gcs1
Atg9a		Gpr64		Nipa1		Gdpd3
Athl1		Gprasp2		Npc2		Gemin5
Atl2		Gpsm2		Nrbp2		Ggt5
Atoh8		Gpsn2		Nrp1		Gimap8
Atp10a		Gpx7		Nt5c		Gkap1
Atp11a		Grasp		Nubp2		Gla
Atp13a2		Grcc10		Ocrl		Glrx2
Atp13a4		Grpel1		Ola1		Glrx5
Atp1a2		Gstt1		Orai1		Gm1964
Atp1b1		Guk1		OTTMUSG00000003456		Gmppb
Atp2a3		Gzmb		OTTMUSG00000009332		Gnat2
Atp2b4		H2afx		OTTMUSG00000023361		Gnb2l1
Atp6v1c1		Hadhb		Pam		Got2
Atp8a2		Hars		Pard6b		Gp5
Atp8b1		Hdac11		Pbrm1		Gpr18
Atp8b2		Hdlbp		Pcmtd1		Gprasp1
Atxn1		Heatr3		Pdrg1		Gprc5b
Atxn10		Heatr6		Pex6		Grk6
Atxn1l		Hgsnat		Pfdn4		Gspt1
Atxn2		Hic2		Pgls		Gsta4
Atxn7		Hif3a		Phf5a		Gstm5
AU015836		Hip1r		Phgdh		Gtf2f1
Auh		Hira		Pik3r6		Gtf2f2
Aurkaip1		Hmgn3		Pkib		Gtf2h4
Auts2		Hmmr		Pkm2		Gtpbp3
Axl		Hn1		Plac8		Gucy1a3
AY074887		Hnrnpa1		Plec1		H2-Aa
B130006D01Rik		Hnrnpm		Polr2f		H2-D1
B3galnt1		Hopx		Ppan		H2-Eb1
B3galnt2		Hs6st2		Ppp4c		H2-T24
B3galt5		Hsd17b4		Prdx4		H60a
B3gnt6		Hsdl1		Prom1		Hbb-b2
B3gnt7		Hspa9		Prpf39		Hdc
B4galnt4		Hspe1		Prpf8		Hddc3
B4galt1		Iars2		Prps2		Herc1
B4galt5		Icam1		Prr12		Hint1
B4galt7		Icmt		Prr6		Hist1h2bc
B9d2		Idh1		Prss16		Hist1h4i
Bace2		Ifi205		Psma2		Hivep3
Bag3		Ifi47		Psma5		Hk1
Bak1		Ift81		Psmb1		Hk3
Banp		Igj		Psmb2		Hmbs
Barhl1		Igk-V1		Psmb3		Hmga2-ps1
Bat2l		Il17rc		Psme2		Hnmt
Batf3		Ilf2		Psmg1		Homer2
Baz2b		Ing3		Ptdss2		Hoxa5
BB123696		Inha		Ptgs2		Hpn
Bbc3		Inhba		Ptrh2		Hsd17b7
BC003267		Insl3		Qser1		Hsp90aa1
BC004004		Ints2		Rab37		Hsp90ab1
BC005764		Ints5		Rab40b		Hspa1a
BC017647		Ints6		Rabggta		Hspa1b
BC025920		Irf7		Rad18		Hspa8
BC029214		Isg20		Rad23a		Hspd1
BC031441		Itgae		Rag1		Hsph1
BC031781		Itgav		Rag2		Htra2
BC032203		Jam2		Ranbp17		Iah1
BC037703		Kat2a		Rasa4		Ibtk
BC048599		Kbtbd11		Rbm3		Icam4
BC055004		Kctd15		Rbm4b		Ier2
BC055324		Kif22		Rdh14		Ifi30
Bcas2		Kif24		Reep5		Ifi35
Bcdin3d		Kif26b		Rel		Ift122
Bckdhb		Klc3		Retsat		Igh-6
Bcl10		Klhl13		Rfk		Igsf6
Bcl11a		Kpna1		Ripk1		Igtp
Bcl2		Kpna3		Rit1		Iigp1
Bcl2l1		Krba1		Rmcs5		Il10rb
Bcl2l14		Larp2		Rmnd1		Il17re
Bcl3		Larp4		Rnaset2a		Il18
Bcl6		Lcmt2		Rnf128		Il2rg
Bcl7c		Leprot		Rnf14		Inadl
Bcl9		Lima1		Rnf141		Ino80e
Bcl9l		Lipa		Rnf19a		Ints10
Bcmo1		Lmnb2		Rpl37a		Ints9
Bcor		LOC100038887		Rpl5		Ipmk
Bcr		LOC100040592		Rplp0		Irf6
Bend4		LOC100043766		Rprd1a		Irf8
Bex6		LOC100046855		Rps10		Irgm1
Bfsp2		LOC545261		Rps12		Isyna1
Bhlha9		LOC67527		Rps13		Itgb1
Bhlhe40		Lonrf3		Rps19		Itm2a
Bhlhe41		Lpp		Rps26		Kars
Bicd2		Lrrc20		Rps27l		Kcnq5
Bin3		Lrrc8c		Rps6		Kctd14
Blm		Lsm11		Rqcd1		Kdelr2
Blmh		Lsm6		Rras2		Kel
Bmf		Lsm7		Rrp15		Khdrbs1
Bmp2k		Lsp1		Rrp9		Khdrbs3
Bmp8a		Ltb		Ruvbl2		Khk
Bmpr2		Ltbp3		Sacs		Kif5b
Bms1		Lxn		Sap18		Klf1
Bnc1		Lyrm5		Selenbp1		Klf12
Bnip3l		Lzic		Sema4a		Klf4
Bod1		Magt1		Sepx1		Klhl4
Bod1l		Man2a2		Serf2		Kti12
Bpgm		Map3k7		Serpinb6b		Lamp1
Brap		Map3k7ip1		Setd4		Lap3
Brca1		Mapk1		Sft2d1		Laptm4b
Bre		Mapk8		Sft2d2		Lats1
Btbd19		Matr3		Sgcb		Lck
Btbd9		Mbd2		Sh3bgrl3		Ldha
Btd		Mbd4		Sip1		Ldhb
Btg4		Mbnl3		Sipa1l2		Ldhd
Btk		Mbp		Sirt7		Leprel2
Btn1a1		Mbtd1		Slain1		Letm2
Btnl9		Mcat		Slc12a6		Lman1
C030002C11Rik		Mcm6		Slc18a1		Lmo4
C030039L03Rik		Mdm4		Slc25a36		LOC100039489
C030046I01Rik		Med20		Slc25a39		LOC100042332
C130026L21Rik		Med8		Slc2a6		LOC100047360
C1d		Mesdc2		Slc36a1		LOC100047856
C230035I16Rik		Metap2		Slc43a2		LOC100048050
C330018D20Rik		Metrn		Slpi		Lpcat1
C5ar1		Mett10d		Snord22		Lpcat3
C87499		Mgll		Snrpb		Lrp10
C9		Mki67ip		Snx1		Lrrc47
Cab39		Mllt11		Son		Lrrc59
Cabin1		Mms19		Spag1		Lsm8
Cabp1		Mnat1		Spata6		Ltb4r1
Cacna1d		Morn4		Spcs1		M6pr
Cacna2d2		Mpp6		Spsb4		Maf
Cacng1		Mrpl12		Srp72		Magi3
Cage1		Mrpl35		Ssr2		Magoh
Calca		Mrpl53		Strap		Mansc1
Calcr		Mrpl9		Suv39h1		Mapk1ip1
Calcrl		Mrps16		Taf6l		Mapk1ip1l
Calm1		Mrps18b		Tcea1		Mapk9
Calm2		Mrs2		Tcf25		Marcks
Calm4		Ms4a2		Tcf3		Marveld1
Calm5		Mtch2		Tcn2		Marveld2
Calml3		Mtf1		Tesc		Mbc2
Calr		Mthfd2		Tex15		Mcart6
Camk2a		Mtm1		Th1l		Mcm3
Camta1		Mtpn		Thop1		Mcoln2
Cap2		Mum1		Thy1		Mctp2
Capn10		Muted		Tial1		Mdfi
Capn2		Myadm		Timm10		Me2
Capn5		Mycbp2		Timm13		Mecr
Capns1		Myeov2		Timm17a		Mefv
Caprin1		Mylc2pl		Timm17b		Meg3
Capsl		Mylpf		Timm44		Memo1
Car12		Nampt		Timm9		Mett11d1
Car8		Narf		Tlr2		Mgl1
Card10		Narg1		Tmem119		Mid1
Card6		Nars		Tmem136		Minpp1
Carkd		Nat11		Tmem41b		Mkrn1
Cars		Ncapd2		Tmem50a		Mmrn1
Cartpt		Ncbp2		Tmem9b		Mobkl1b
Casd1		Ncl		Tmie		Mpa2l
Cask		Ndrg4		Tpm3		Mpdz
Cbara1		Nedd4		Tpp2		Mpzl1
Cbfa2t3		Nedd8		Tra2a		Mrpl17
Cblc		Nelf		Trappc4		Mrpl18
Cbln4		Neo1		Trem3		Mrps28
Cbwd1		Nfu1		Trp53bp1		Mrps9
Ccbp2		Nhedc2		Ttyh2		Ms4a3
Ccdc101		Nhp2l1		Tube1		Ms4a4c
Ccdc109a		Nin		Txndc11		Mt1
Ccdc109b		Nip7		Txnrd3		Mt2
Ccdc111		Nktr		Tyms		Mta2
Ccdc114		Nkx2-3		Uba3		Mtch1
Ccdc115		Nmt1		Ube2e2		Mthfd1
Ccdc132		Noc4l		Ube2m		Mtmr4
Ccdc135		Npl		Uck1		Mtmr9
Ccdc138		Nsmce4a		Ucp2		Mtr
Ccdc146		Nubp1		Ufc1		Myo1d
Ccdc147		Nudcd2		Ufsp1		Myo7a
Ccdc19		Nudcd3		Ugt1a6a		Naip2
Ccdc43		Nudt19		Uqcrc1		Ncf1
Ccdc48		Nudt4		Uqcrh		Ndn
Ccdc54		Nudt5		Utp6		Ndufa4
Ccdc80		Nuf2		Vamp4		Ndufab1
Ccdc83		Nup37		Vat1		Ndufb5
Ccdc85c		Nup62		Vit		Ndufb9
Ccdc9		Nxnl2		Wdr75		Ndufc1
Ccdc90a		Oaf		Whsc1		Ndufc2
Cck		Obscn		Xpnpep1		Ndufs7
Ccl1		Obsl1		Xpo6		Ndufv1
Ccl2		Ocel1		Yars2		Necap2
Ccl5		Ogdh		Yif1b		Nfkbib
Ccl7		Opa3		Ypel1		Nhlrc2
Ccnd3		Orc2l		Ythdf3		Niban
Ccng2		Orc6l		Ywhae		Nisch
Ccni		OTTMUSG00000008305		Zbtb5		Nlrx1
Ccnj		OTTMUSG00000011070		Zc3h13		Nol5
Ccnl1		OTTMUSG00000023003		Zfp111		Nola2
Ccnt2		Otud7b		Zfp68		Nolc1
Ccnyl1		P2ry1		Zfp820		Nope
Ccr1		Pabpc4l		Zfp87		Nov
Ccr10		Pabpn1		Zfp93		Npal3
Ccr3		Padi4		Zscan21		Npm1
Ccr7		Pak1ip1				Npm3
Ccs		Pak2				Nqo2
Cct8		Pard6g				Nr4a1
Cd163		Parp3				Nrk
Cd164l2		Pbx4				Nsf
Cd180		Pcgf5				Nucb1
Cd226		Pcgf6				Nudc
Cd247		Pcmt1				Nudt13
Cd276		Pcnt				Nup107
Cd300a		Pdap1				Nus1
Cd302		Pdcd2l				Oaz1
Cd33		Pdia2				Olfm1
Cd34		Pdia3				Osbpl3
Cd3d		Pds5b				OTTMUSG00000010173
Cd44		Pdzd3				P4hb
Cd53		Pear1				Pa2g4
Cd5l		Pex16				Pabpc4
Cd81		Pgpep1				Papss2
Cd84		Phf10				Paqr5
Cd9		Phf17				Pcbp2
Cdan1		Phf3				Pck2
Cdc123		Phf7				Pde2a
Cdc2l6		Phf8				Pde4dip
Cdc42ep1		Phlda2				Pdha1
Cdc42se2		Phtf2				Pdia6
Cdc6		Pigq				Pdlim1
Cdca5		Pld2				Pdxk
Cdgap		Plekha7				Pex11c
Cdh12		Plk1				Pgd
Cdh16		Plk4				Pgs1
Cdh17		Plrg1				Phldb2
Cdh23		Plvap				Pik3ap1
Cdh26		Pmf1				Pkd2
Cdh29		Pmm1				Pkia
Cdh5		Pnkd				Pklr
Cdk5rap2		Podxl				Pld4
Cdk5rap3		Pogk				Plod3
Cdkal1		Pola2				Pltp
Cdkl3		Polr1e				Plxdc1
Cdkn1a		Polr2b				Pnkp
Cdkn2b		Polr3e				Pno1
Cdkn2d		Pon2				Pold1
Cdkn3		Ppap2a				Ppargc1a
Cds1		Ppat				Ppfia4
Cebpe		Ppih				Ppic
Cela1		Ppm1g				Ppm1b
Cenpm		Ppp1cc				Ppox
Cenpo		Ppp1r15b				Ppp3cb
Centb1		Ppp1r7				Ppt1
Cep110		Ppp2r1b				Pram1
Cep250		Ppp2r5c				Prdm16
Cep350		Pprc1				Prdx2
Cep68		Prc1				Prdx6
Cep70		Prdm5				Prkag2
Cep78		Prdx1				Prmt5
Cep97		Prdx3				Psap
Cerk		Prkcdbp				Psen1
Cfc1		Prkd1				Psip1
Cfdp1		Prmt1				Psma6
Cflar		Prpf19				Psma7
Cfp		Psmb5				Psmb10
Chchd5		Psmc3				Psmb8
Chchd6		Psmc5				Psmd1
Chd5		Psmd13				Psmd11
Chd9		Psmd9				Psme3
Chl1		Psme4				Psrc1
Chmp4b		Psmg2				Ptbp1
Chn2		Ptcd1				Ptges2
Chrdl1		Ptdss1				Ptgir
Chrna9		Ptpn14				Ptpdc1
Chst11		Pwp1				Ptplad2
Chst14		Pwp2				Ptpmt1
Chst15		Pygb				Ptpn11
Ciita		Pygo2				Ptpn21
Cirbp		Qdpr				Ptpn3
Cisd2		Qtrt1				Ptprf
Clasp2		Rab23				Pus1
Clca3		Rab24				Pvrl3
Clca5		Rab34				Pyhin1
Clcn4-2		Rab3d				Rab6
Clcn7		Rad51ap1				Rad17
Cldn10a		Rad54l				Rad23b
Clec16a		Rangap1				Raf1
Clec2d		Rap1gap				Ranbp1
Clec4b2		Rapgef5				Rangrf
Clec4g		Rchy1				Rassf4
Clec4n		Rdh5				Rbbp4
Clec9a		Rdx				Rbck1
Clic1		Rec8				Rbks
Clic5		Recql				Rbm28
Clk3		Recql4				Rbm39
Clptm1		Reep6				Rbpms2
Cmas		Rem2				Rdh11
Cmbl		Rexo1				Reps2
Cmtm6		Rexo4				Rexo2
Cmtm7		Rfc5				Rhd
Cnga3		Rfx1				Rhobtb3
Cnih3		Rgnef				Rilpl1
Cnksr3		Rgs19				Riok3
Cno		Rhbdf1				Rnase4
Cnot2		Rhoq				Rnf217
Cntnap1		Rnf121				Rnps1
Cntnap5b		Rnf145				Robo4
Cobl		Rnf185				RP23-143A14.5
Cog3		Rnf26				Rpain
Cog6		Rnf4				Rpgrip1
Col15a1		Rnmtl1				Rpl13a
Col17a1		Rock1				Rpl36al
Col18a1		Rpap3				Rpl8
Col23a1		Rpl10				Rplp1
Col5a2		Rpo1-4				Rplp2
Col8a1		Rprd2				Rpo1-3
Colq		Rps18				Rpp30
Cops4		Rrp12				Rps15a
Cops7b		Rsad2				Rps24
Coro1c		Rsc1a1				Rrm2
Coro2a		Rtn4				Rrs1
Cox10		Rtn4ip1				Rtn3
Cpa5		Ryr3				Sae1
Cpa6		Sar1a				Samd14
Cpb1		Sart3				Samd9l
Cpeb4		Sash1				Saps3
Cplx2		Scarb2				Satb1
Cpn2		Scd2				Sbds
Cpne5		Scyl3				Scamp3
Cr2		Sdad1				Scp2
Cradd		Sdccag3				Scyl2
Crbn		Sec13				Sdhd
Creb1		Sec23b				Sec23ip
Creb3l1		Sel1l				Selenbp2
Creb5		Setdb1				Sema7a
Creg2		Sf1				Senp2
Crem		Sfrs4				Sephs1
Crisp2		Sfrs8				Serp1
Crispld2		Sh3bgrl				Serpina3g
Crlf2		Sh3d19				Serpinb1a
Crlf3		Sh3kbp1				Serpinf1
Crtc3		Sh3yl1				Sestd1
Cryaa		Shkbp1				Set
Cryba4		Sigirr				Sf3b3
Csda		Slc1a5				Sfi1
Csf1		Slc25a33				Sfrs18
Csf2		Slc25a38				Sfxn1
Csf2ra		Slc25a5				Sfxn3
Csmd1		Slc30a10				Shmt1
Csnk1g2		Slc35a1				Shmt2
Csnk1g3		Slc39a4				Siglec5
Ctcf		Slc7a5				Sin3a
Ctcfl		Smap2				Sin3b
Ctdspl		Smarcd2				Slc11a2
Ctla2a		Smc1a				Slc14a1
Ctnna2		Smc6				Slc15a2
Ctnnd2		Smek1				Slc15a4
Ctsb		Smpdl3b				Slc16a1
Ctsd		Snap23				Slc22a17
Ctsk		Snn				Slc22a4
Cubn		Socs2				Slc25a1
Cuedc1		Solh				Slc25a30
Cugbp2		Sox12				Slc25a44
Cul4a		Spag7				Slc26a1
Cux1		Spata5l1				Slc27a4
Cxcl3		Specc1				Slc35a4
Cxcl5		Spn				Slc35b1
Cxcr5		Spo11				Slc38a5
Cxcr7		Sppl3				Slc9a5
Cxxc4		Ssrp1				Slmo2
Cyb5r1		Stag1				Smo
Cyp1a2		Stam2				Smpdl3a
Cyp26a1		Stard6				Snhg3
Cyp26b1		Stx18				Snrpa1
Cyp2b19		Suds3				Spata5
Cyp2g1		Sumf1				Spcs2
Cyp2r1		Supt16h				Speg
Cyp39a1		Surf4				Sphk1
Cyp4f39		Synpo2				Spire1
Cyp4x1		Syt11				Spry2
Cyp51		Taf2				Srd5a3
Cypt4		Taok1				Srr
Cyr61		Tapbpl				Ssr1
Cysltr2		Tars2				Ssr4
Cyth4		Tasp1				Ssx2ip
Cytip		Tbc1d10c				St13
Cytsa		Tbrg4				St6galnac4
D030028A08Rik		Tcea2				Stip1
D130009I18Rik		Tcf19				Stk11
D14Ertd436e		Tcf4				Stt3b
D17H6S56E-3		Tcfe2a				Stub1
D18Ertd653e		Tdp1				Stx2
D1Bwg0212e		Thbs1				Stxbp1
D3Bwg0562e		Thrap3				Stxbp2
D430042O09Rik		Timm8a1				Sulf2
D630003M21Rik		Tle2				Supt7l
D6Wsu116e		Tlk1				Suz12
D6Wsu163e		Tm2d3				Syncrip
D830046C22Rik		Tm7sf3				Taldo1
D930015E06Rik		Tmem160				Tapbp
D930020E02Rik		Tmem167				Tardbp
Dab2		Tmem168				Tbc1d2b
Dab2ip		Tmem177				Tcta
Dap		Tmem179b				Tert
Dapk1		Tnfrsf14				Tfpi
Dapp1		Tnpo1				Tgds
Dars		Tpr				Thoc5
Dars2		Tprkb				Thyn1
Dazl		Tpx2				Tia1
Dbc1		Traf5				Timeless
Dcaf13		Trib3				Tkt
Dcaf6		Trim24				Tle1
Dcaf7		Trim25				Tm2d2
Dcakd		Trim27				Tmem115
Dcp2		Trim37				Tmem14c
Dctpp1		Tro				Tmem161a
Ddah1		Trove2				Tmem176a
Ddc		Trp53i13				Tmem188
Ddr1		Trpc6				Tmem191c
Ddx1		Ttc12				Tmem192
Def6		Ttc13				Tmem222
Defa6		Ttc21b				Tmem56
Defb1		Ttc23				Tomm40l
Dennd1b		Ttpa				Tomm7
Dennd2c		Ttpal				Tox
Dennd3		Tuba4a				Tpm2
Depdc1b		Tubb2c1				Trib2
Dgcr6		Tubb5				Trim12
Dgki		Tubgcp5				Trim30
Dgkz		Tubgcp6				Trim34
Dhcr24		Tuft1				Trim68
Dhrs11		Twf2				Tslp
Dhrs3		Txnrd1				Tsn
Dhrs7		Tymp				Tsnax
Dhx33		Tysnd1				Tspan17
Dhx37		Ubac1				Tspan8
Diap1		Ube2d3				Tspo
Diap2		Ube2g2				Ttc14
Dido1		Ube2i				Ttc28
Dip2a		Ube2l3				Ttc39a
Dip2b		Ube2s				Ttll12
Dirc2		Ube4a				Tufm
Dlg3		Ubqln1				Tulp3
Dlgap1		Ubqln2				Txndc17
Dlgap5		Uchl5ip				U2af1
Dll4		Uhrf1				Uba1
Dmwd		Uhrf1bp1				Ubap2l
Dnahc6		Unc45b				Ube2a
Dnahc8		Use1				Ubfd1
Dnajb1		Usp1				Ubl4
Dnajc15		Usp15				Unc119b
Dnajc16		Usp31				Uqcrq
Dnajc28		Usp4				Urod
Dnm3		Usp46				Usp14
Dnmt3a		Usp7				Usp24
Dock10		Utp18				Vamp5
Dock4		Vdr				Vdac2
Dock5		Vps4a				Vegfc
Dock7		Vps53				Vnn1
Dock8		Wbp7				Vps18
Dohh		Wdr1				Wbscr16
Dpf3		Wdr26				Wbscr27
Dpm3		Wdr32				Wdr12
Dpp9		Wdr37				Wdr23
Dppa4		Wdr40a				Wdr40b
Dscam		Wdr57				Xbp1
Dscr3		Wdr73				Yif1a
Dspp		Wdr74				Ythdf1
Dtl		Wdr79				Ywhaq
Dtnb		Wipi2				Zan
Dtnbp1		Wrn				Zbtb20
Dtx2		Wsb2				Zbtb4
Dus3l		Xk				Zc3h15
Dusp1		Xkr8				Zdhhc7
Dusp12		Xpo4				Zfp30
Dusp2		Xrn2				Zfp354c
Dusp4		Yipf6				Zfp51
Dusp5		Yrdc				Zfp593
Dusp6		Zbtb22				Zfp612
Dym		Zcchc18				Zfp618
Dynlt1f		Zcchc6				Zfp622
Dyrk2		Zdhhc23				Zfp69
Dyrk3		Zfand2a				Zfp827
E030002O03Rik		Zfp106				Zfp828
E030011O05Rik		Zfp259				Zkscan3
E230029C05Rik		Zfp260				Zmynd19
E2f2		Zfp286				Znrf3
E2f3		Zfp397				Zscan12
E2f6		Zfp445
E430016F16Rik		Zfp467
E4f1		Zfp566
Eaf1		Zfp579
Echdc3		Zfp617
Ect2		Zfp691
Edc4		Zfp91
Edem2		Zfx
Edem3		Zfyve20
Edn3		Zmym2
Ednrb		Znf512b
Eef1a1		Zswim1
Efcab4b
Efha1
EG240055
Egflam
Egln3
Egr1
Ehbp1
Ehd2
Ehmt2
Eif1a
Eif2ak4
Eif2s2
Eif3h
Elf1
Elf4
Elfn2
Elk3
Ell
Ell2
Elmo1
Elovl6
Elovl7
Eltd1
Emb
Emid1
Eml1
Eml6
Emp1
Emp3
Emr1
Emr4
Eng
Enpp4
Enpp5
Enpp7
Ensa
Enthd1
Entpd3
Entpd4
Epas1
Epb4.1l1
Epb4.1l3
Epb4.1l4a
Epc2
Ephb2
Ephb4
Ephb6
Epn2
Eps15l1
Eps8l3
Erbb2ip
Ercc1
Ercc4
Erg
Ergic1
Eri1
Erich1
Ern1
Erv3
Esrrg
Esyt1
Etl4
Etnk1
Etohd2
Etv3
Etv5
Etv6
Evi5
Evx2
Exoc6
Exoc6b
Exosc10
Extl3
Eya2
Ezh1
Ezh2
F11r
F2r
F2rl1
F2rl2
F2rl3
F630028O10Rik
F730043M19Rik
F830045P16Rik
Fabp12
Fads1
Fads2
Fahd1
Faim
Fam102a
Fam102b
Fam105a
Fam107a
Fam107b
Fam108b
Fam109b
Fam116a
Fam117a
Fam119a
Fam120b
Fam125b
Fam129a
Fam129b
Fam134a
Fam13b
Fam163a
Fam163b
Fam170a
Fam171a1
Fam173a
Fam178a
Fam179b
Fam181b
Fam189a1
Fam190a
Fam198b
Fam19a4
Fam20b
Fam20c
Fam23a
Fam38a
Fam43b
Fam46a
Fam49a
Fam55d
Fam58b
Fam59a
Fam63a
Fam65a
Fam65b
Fam69a
Fam71a
Fam71f1
Fam82a1
Fam83f
Fam83h
Fam92b
Fancc
Far2
Fasl
Fat1
Fat3
Fbf1
Fbn1
Fbrs
Fbrsl1
Fbxl17
Fbxo28
Fbxo45
Fbxo9
Fbxw11
Fbxw5
Fcer1g
Fcer2a
Fcgr1
Fcgr4
Fchsd2
Fcrlb
Fcrls
Fert2
Fgd3
Fgf10
Fgf6
Fgfr1
Fgfr3
Fggy
Fhdc1
Fhit
Fhl3
Fhl4
Filip1
Filip1l
Fkbp1a
Fkbp5
Fkrp
Flnb
Flot1
Flt1
Flt3l
Flywch1
Fmnl1
Fmnl3
Fnbp1
Fndc7
Fnip2
Fos
Fosb
Foxi1
Foxk1
Foxl1
Foxn3
Foxo1
Foxo3
Foxp1
Foxp4
Foxred2
Foxs1
Frmd4a
Frmd5
Frmpd1
Fry
Fshr
Fsip1
Fth1
Fto
Fut10
Fut7
Fxyd5
Fyb
Fyco1
Fyn
Fzd5
Fzr1
Gab2
Gabbr2
Gabrg3
Gabrr3
Gal
Gal3st1
Gal3st2
Galm
Galnt5
Galnt6
Galnt9
Galntl4
Galr3
Gas7
Gata2
Gatc
Gbx1
Gbx2
Gcat
Gcm1
Gcnt4
Gcom1
Gdnf
Gem
Gfod1
Gfod2
Gfra1
Gfra2
Gga1
Ggct
Ggt1
Ggta1
Ghrhr
Gimap6
Giyd2
Gjb1
Glipr1
Glipr1l1
Glod5
Glp1r
Glrp1
Gls
Glt28d2
Glt8d3
Gm10584
Gm10825
Gm10941
Gm11346
Gm11992
Gm12528
Gm12824
Gm1337
Gm13889
Gm14047
Gm14085
Gm14203
Gm156
Gm1574
Gm1604b
Gm1631
Gm16532
Gm216
Gm266
Gm2a
Gm3258
Gm3417
Gm3448
Gm4659
Gm4736
Gm4906
Gm5105
Gm5148
Gm5458
Gm5544
Gm5577
Gm5617
Gm6086
Gm6578
Gm6583
Gm672
Gm6981
Gm71
Gm711
Gm766
Gm815
Gm885
Gm889
Gmds
Gmeb1
Gmfg
Gmppa
Gmpr
Gna15
Gnai2
Gnaq
Gnaz
Gng2
Gng4
Gnpda1
Gorab
Gp1ba
Gp49a
Gp6
Gp9
Gpaa1
Gpam
Gpc5
Gpd2
Gpi1
Gpr114
Gpr124
Gpr126
Gpr137b
Gpr141
Gpr146
Gpr161
Gpr20
Gpr25
Gpr33
Gpr39
Gpr55
Gpr56
Gpr61
Gpr65
Gpr97
Gpr98
Gpsm1
Gpsm3
Gpx6
Gramd1a
Gramd3
Gramd4
Grap
Grap2
Grb10
Grem2
Grhl2
Grhpr
Grifin
Grin1
Grip1
Grm4
Grtp1
Gse1
Gsr
Gtf2e2
Gtf2ird2
Gtf3c5
Gucy2d
Gucy2e
Gulp1
Gypa
H13
H2afy
H2afz
H2-DMb1
H2-Eb2
H2-M5
Haao
Hace1
Hacl1
Hand1
Havcr2
Hc
Hcn4
Hcst
Hdac4
Hdac5
Hdac7
Hdhd2
Heatr2
Hebp1
Hecw2
Heg1
Hey1
Hgfac
Hhat
Hhex
Hibadh
Hif1an
Hipk2
Hist2h2bb
Hist3h2a
Hk2
Hlx
Hmcn1
Hmga1-rs1
Hmgb1
Hmgcr
Hmgcs2
Hmgxb3
Hmha1
Hnrnpa0
Hnrnpa3
Hnrnpd
Hnrnpf
Hnrnpk
Hnrnpul1
Homer1
Homer3
Hoxb1
Hpcal1
Hpcal4
Hpse2
Hrh2
Hs2st1
Hspa4
Htr1a
Htr2a
Htr4
Htr5b
Htr7
Hunk
Hvcn1
Hyal3
Icam2
Id2
Idh2
Ido2
Ier3
Ier5l
Iffo2
Ifi204
Ifih1
Ifitm3
Ifitm6
Ifna1
Ifna13
Ifnar1
Ifne
Igf1r
Igsf5
Igsf8
Ikbkb
Ikzf1
Ikzf2
Il10
Il10ra
Il12rb2
Il15
Il16
Il17a
Il17f
Il17ra
Il1a
Il1b
Il1r2
Il1rl2
Il2
Il20ra
Il21
Il21r
Il22ra2
Il4ra
Il8ra
Il8rb
Il9r
Impa2
Impact
Impdh1
Impdh2
Incenp
Ino80c
Inpp4a
Inpp4b
Inpp5a
Inpp5b
Inpp5d
Inpp5f
Insig1
Insm1
Insr
Ints1
Ints3
Intu
Ipcef1
Ipo11
Ipo13
Ipo7
Ipp
Ippk
Iqgap1
Iqgap2
Iqgap3
Iqsec1
Irf1
Irf2
Irf2bp2
Irf9
Irgm2
Irs2
Irs3
Islr
Islr2
Isy1
Itga11
Itga2
Itga2b
Itga3
Itgad
Itgam
Itgax
Itgb3
Itgb6
Itk
Itln1
Itm2c
Itpk1
Itpkb
Itpr1
Itpr2
Itsn2
Ivns1abp
Iyd
Jak1
Jakmip2
Jmjd1c
Jun
Kalrn
Kank1
Kat2b
Kat5
Katnal1
Kbtbd12
Kcnh1
Kcnj5
Kcnmb1
Kcnn2
Kcnt1
Kcnv2
Kctd1
Kctd10
Kctd16
Kdm1a
Kdm4b
Kdm5a
Kdm6b
Kdsr
Kif13b
Kif16b
Kif1c
Kif20b
Kif23
Kifap3
Kifc1
Kifc3
Kit
Klf13
Klf2
Klf7
Klhl18
Klhl20
Klhl22
Klhl25
Klhl31
Klhl6
Klra1
Klra12
Klra13
Klra15
Klra17
Klra21
Klra22
Klrd1
Klrk1
Kpnb1
Kras
Kremen1
Krtcap2
Krtdap
Ksr2
Ktn1
Ky
Lactb2
Lair1
Lamb3
Lars2
Lass2
Lass4
Lass6
Lat
Lat2
Lax1
Layn
Lbh
Lbr
Lca5l
Lclat1
Lcn4
Lcp1
Lctl
Ldlrad3
Lect2
Lef1
Lemd1
Leo1
Leprotl1
Lfng
Lgr6
Lhfpl1
Lhx4
Lif
Lig1
Lilrb3
Lilrb4
Limch1
Limd2
Limk2
Lims1
Lin54
Lingo2
Lipc
Lipe
Lipg
Litaf
Llph
Lmbrd1
Lmf1
Lmo1
Lmo2
Lnp
Lnpep
LOC547150
Lonp1
Lonrf2
Loxl1
Lphn1
Lphn2
Lpin1
Lpo
Lrba
Lrch1
Lrch4
Lrfn3
Lrig1
Lrp5
Lrp8
Lrpprc
Lrrc1
Lrrc16a
Lrrc27
Lrrc32
Lrrc57
Lrrc6
Lrrc63
Lrrc66
Lrrc8b
Lrrc8d
Lrrfip1
Lrrfip2
Lrrk1
Lrrn2
Lrrn4
Lsr
Lst1
Lta
Ltbp1
Ltc4s
Luzp2
Ly6g6e
Ly6g6f
Ly75
Ly9
Ly96
Lyl1
Lyrm7
Lyst
Lyzl1
Lyzl4
Macrod1
Mad1l1
Mad2l1bp
Maff
Mafk
Magi2
Magix
Malat1
Maml1
Maml2
Maml3
Map3k1
Map3k2
Map3k5
Map3k6
Map4k2
Map4k3
Mapk11
Mapk14
Mapk4
Mapk6
Mapre2
March2
March6
March8
Masp1
Mast2
Mast4
Matk
Mb
Mbd6
Mbl2
Mbnl1
Mc2r
Mccc2
Mcee
Mcf2l
Mcfd2
Mcl1
Mcph1
Mdga1
Mdga2
Mdm1
Mdn1
Me3
Meaf6
Mecom
Med10
Med13l
Med27
Med29
Med4
Mef2c
Mef2d
Megf10
Megf11
Metrnl
Mettl10
Mettl13
Mettl7b
Mex3a
Mfhas1
Mfng
Mfsd2b
Mfsd4
Mfsd6
Mgst3
Miat
Mical1
Micall2
Midn
Mier3
Mir107
Mir122a
Mir133a-2
Mir142
Mir146
Mir147
Mir152
Mir17
Mir181c
Mir182
Mir205
Mir222
Mir23a
Mir26b
Mir297-1
Mir29b-1
Mir365-2
Mir598
Mir684-2
Mir704
Mir719
Mir7-2
Mir874
Mir9-3
Mirlet7i
Mitd1
Mitf
Mkl1
Mkl2
Mknk1
Mknk2
Mlec
Mlf1ip
Mll5
Mllt1
Mllt10
Mlycd
Mmp2
Mmp9
Moap1
Mobkl1a
Mobkl2a
Mocs3
Mogat1
Morn1
Moxd2
Mphosph9
Mppe1
Mpst
Mrc1
Mrfap1
Mrgprx1
Mrpl14
Mrpl21
Mrpl30
Mrpl37
Mrps18a
Mrps23
Mrps31
Mrvi1
Msh4
Msh5
Msh6
Msl2
Msra
Mta3
Mtap
Mtap1b
Mtdh
Mthfd1l
Mthfd2l
Mtmr14
Mtmr3
Mtmr7
Mtor
Mtpap
Mtss1
Mtus2
Mtx2
Mtx3
Muc13
Muc20
Mul1
Musk
Mxra8
Myb
Myh14
Myh3
Myh9
Myl10
Myl4
Myl6b
Mylip
Mylk2
Myo10
Myo16
Myo1b
Myo3a
Myo5a
Myo5c
Myof
Myom1
Myst3
Nab1
Nccrp1
Nceh1
Nck2
Ncln
Ncoa2
Ncoa4
Ncoa7
Ncor2
Ndel1
Ndfip1
Ndor1
Ndst1
Ndufb10
Ndufb6
Nedd4l
Nedd9
Nefh
Nek6
Neu4
Neurl3
Neurod6
Nf1
Nfasc
Nfatc1
Nfatc4
Nfe2
Nfe2l2
Nfib
Nfix
Nfkb1
Nfkbil1
Ngly1
Nhedc1
Nhlrc1
Ninj1
Ninj2
Nipal2
Nkx2-5
Nkx6-2
Nlgn1
Nlgn3
Nlrp2
Nmd3
Nme7
Nmnat2
Nmu
Nmur1
Nnmt
Nobox
Nol11
Nop2
Nos1ap
Nosip
Notch2
Notch3
Nova2
Noxa1
Npepps
Nploc4
Nptx1
Npvf
Nr1h4
Nr1i3
Nrap
Nrarp
Nrf1
Nrg3
Nrgn
Nrip1
Nrip3
Nrsn2
Nrtn
Nsfl1c
Nsl1
Nsmaf
Nsmce1
Nsun7
Nt5c3
Nt5dc3
Nuak1
Nub1
Nubpl
Nup155
Nwd1
Nxt1
Nynrin
Nyx
Obfc2a
Odf1
Odf4
Odz4
Ogfod2
Ogfrl1
Oit3
Olfm3
Olfml2b
Olfr1226
Olfr1228
Olfr1367
Olfr1389
Olfr1390
Olfr1391
Olfr1509
Olfr1514
Olfr335
Olfr374
Olfr417
Olfr420
Olfr432
Olfr631
Olfr645
Olfr646
Olfr648
Olfr65
Olfr750
Olfr854
Olfr855
Olfr9
Olig1
Olig3
Oplah
Oprd1
Optc
Orai2
ORF63
Osbpl9
Oscar
Osgin1
Otop1
Oxr1
Oxtr
P140
P2rx1
P2rx3
P2ry14
P2ry2
P2ry6
P4ha1
P4ha2
Pabpc1
Pabpc1l
Pacrg
Padi1
Padi2
Pag1
Pak4
Pan3
Pank1
Panx1
Paox
Papd4
Paqr7
Park2
Parl
Parp16
Pax2
Pax8
Pbx1
Pcca
Pccb
Pcdh1
Pcp4l1
Pcsk6
Pctk2
Pctp
Pdc
Pdcd1
Pdcd1lg2
Pdcd4
Pde10a
Pde11a
Pde4b
Pde4d
Pde5a
Pde6b
Pde6c
Pde6h
Pde7a
Pde7b
Pdgfb
Pdgfd
Pdgfrb
Pdhx
Pdk3
Pdpk1
Pdxp
Pebp4
Peci
Peli1
Pemt
Perp
Pex7
Pf4
Pftk2
Pgam1
Pgm5
Phactr2
Phc2
Phf15
Phf20l1
Phf21a
Phldb1
Phldb3
Phlpp1
Phxr4
Pigc
Pigg
Pigl
Pigp
Pigt
Pigu
Pigv
Pigw
Pik3c2a
Pik3c2b
Pik3cg
Pik3r1
Pik3r3
Pilrb1
Pim1
Pion
Pip4k2b
Pip5k1a
Pira3
Pisd-ps2
Pitpnc1
Pitpnm1
Pja1
Pkd1l2
Pkd2l1
Pkdcc
Pkn2
Pknox1
Pla1a
Pla2g6
Pla2r1
Plat
Plau
Plcb4
Plcg2
Plcl1
Plcl2
Plekha2
Plekhg5
Plekhh3
Plekhm1
Plekhm3
Plekho2
Plg
Plin3
Plscr1
Plscr2
Plxna4
Pmaip1
Pmepa1
Pml
Pms1
Pof1b
Pogz
Poln
Polr1a
Polr2a
Polr2e
Polr3g
Polr3gl
Pomt2
Pop1
Popdc2
Por
Pot1b
Pou2af1
Pou2f1
Ppa2
Ppapdc2
Ppapdc3
Ppard
Pparg
Ppef2
Ppie
Ppif
Ppm1a
Ppm1d
Ppp1r12c
Ppp1r13b
Ppp1r14c
Ppp1r15a
Ppp1r2
Ppp1r3b
Ppp1r9b
Ppp2r2b
Ppp2r3a
Ppp2r5a
Ppp3ca
Pqlc1
Prcc
Prcp
Prdm2
Prex1
Prf1
Prkab1
Prkacb
Prkca
Prkce
Prkci
Prkcq
Prkcz
Prkd2
Prkd3
Prkdc
Prl3b1
Prl3c1
Prnp
[truncated: 857 more rows]
